# Supplementary material for: Insights into the mechanism and origin of solvent-controlled chemodivergence in the synthesis of Au-catalyzed bicyclo[2.2.1]heptanes from 3-alkoxy-1,6-diynes: a DFT perspective
Source: Royal Society of Chemistry journal article supplement (doi:10.1039/d4qo00816b), 2024-01-01
Supplement: d4qo00816b1.pdf [file d4qo00816b1.pdf]

### Electronic supplementary information

Insights into the Mechanism and Origin of Solvent-Controlled Chemodivergence in  
the Synthesis of Au-Catalyzed Bicyclo[2.2.1]heptanes from 3-Alkoxy-1,6-Diynes: A  
DFT Perspective

Aili Feng, and Dongju Zhang\*

Key Lab of Colloid and Interface Chemistry, Ministry of Education, School of  
Chemistry and Chemical Engineering, Shandong University, Jinan 250100, P. R.  
China

Corresponding author:

E-mail: zhangdj@sdu.edu.cn

Tel: +86-531-88365833

## Table of Contents

|                                                                                                                                                       |    |
|-------------------------------------------------------------------------------------------------------------------------------------------------------|----|
| <b>I.</b> Calculated IRC results for <b>TS1</b> .....                                                                                                 | S3 |
| <b>II.</b> Calculated results for the formation of cyclopentane <b>D</b> .....                                                                        | S3 |
| <b>III.</b> Calculated results for the protodeauration process at the C <sub>5</sub> position in <b>IM3</b> .....                                     | S4 |
| <b>IV.</b> Calculated results for the formation of cyclopentene <b>E<sub>DCE</sub></b> and cyclopentanone <b>P<sub>2DCE</sub></b> in DCE solvent..... | S5 |
| <b>V.</b> Optimized geometries and calculated the relative Gibbs free energies for key transition states.....                                         | S6 |
| <b>VI.</b> Thermodynamic data.....                                                                                                                    | S7 |
| <b>VII.</b> Cartesian coordinates of all structures involved in this work.....                                                                        | S8 |

## I. Calculated IRC results for TS1

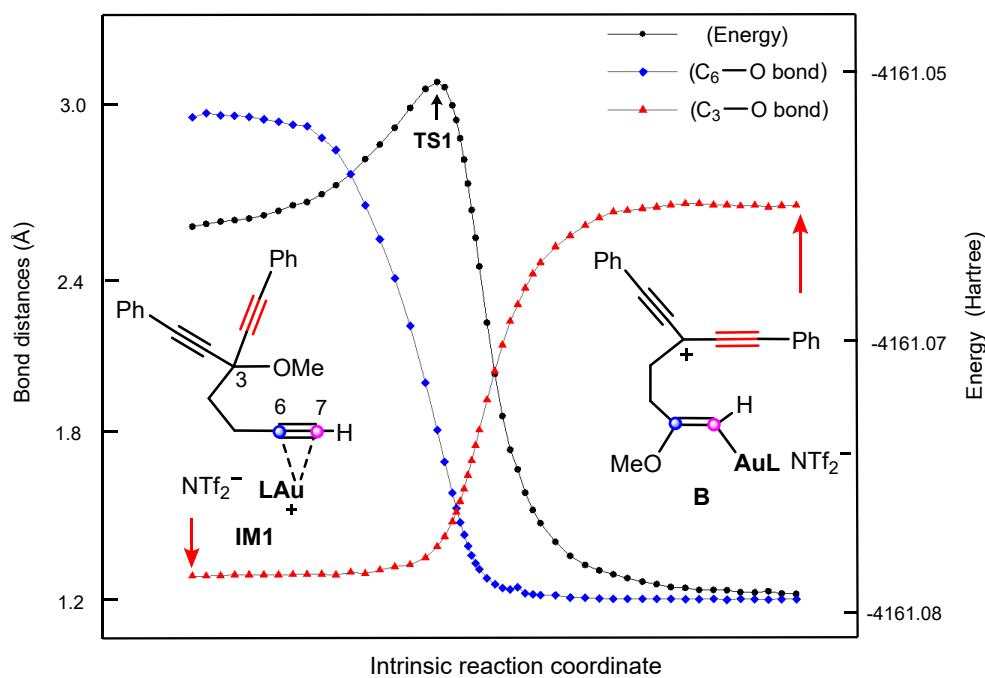

Fig. S1 IRC calculation results for transition state TS1.

## II. Calculated results for the formation of cyclopentane D

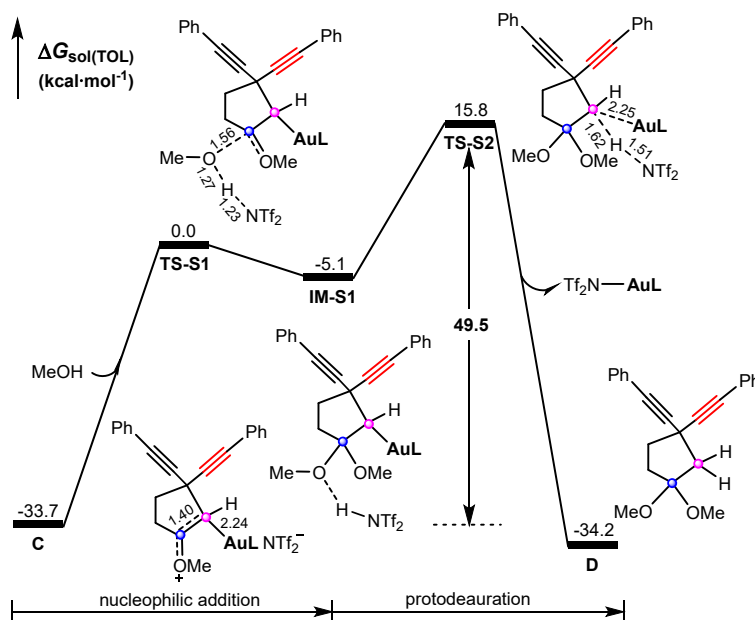

Fig. S2 Calculated free energy profile for the formation of cyclopentane D. Bond distances (black values) are in Å.

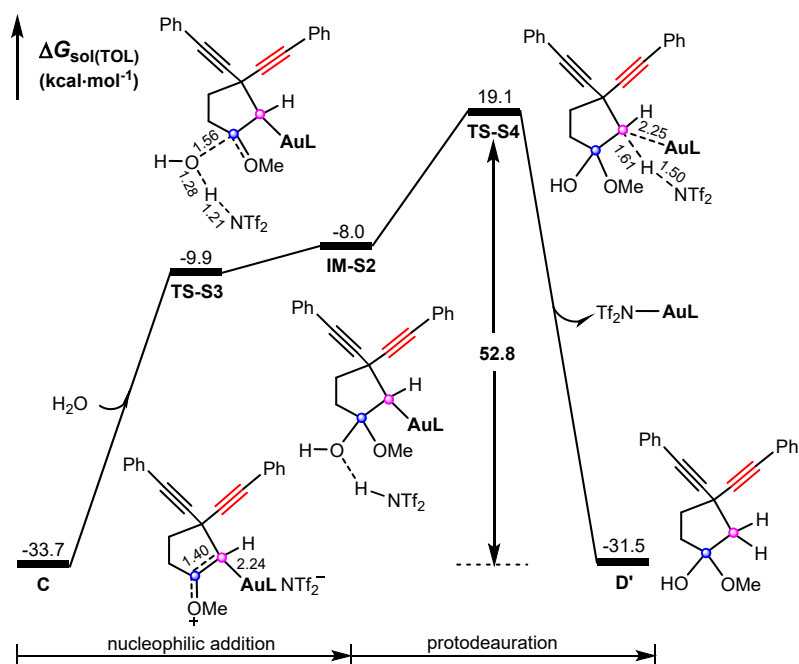

**Fig. S3** Calculated free energy profile for the formation of another cyclopentane **D'**. Bond distances (black values) are in Å.

### III. Calculated results for the protodeauration process at the C<sub>5</sub> position in **IM3**

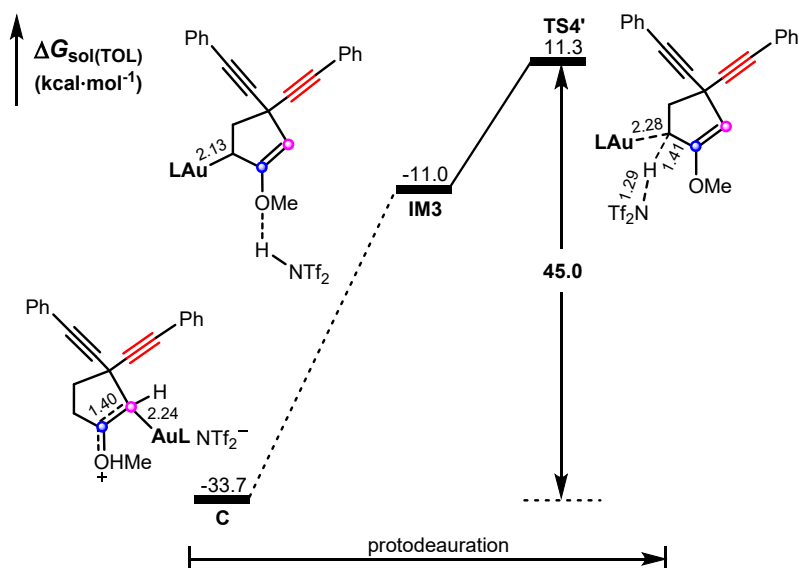

**Fig. S4** Calculated free energy profile for the protodeauration process at the C<sub>5</sub> position in **IM3**. Bond distances (black values) are in Å.

### IV. Calculated results for the formation of cyclopentene **E<sub>DCE</sub>** and cyclopentanone

## P<sub>2</sub>DCE in DCE solvent

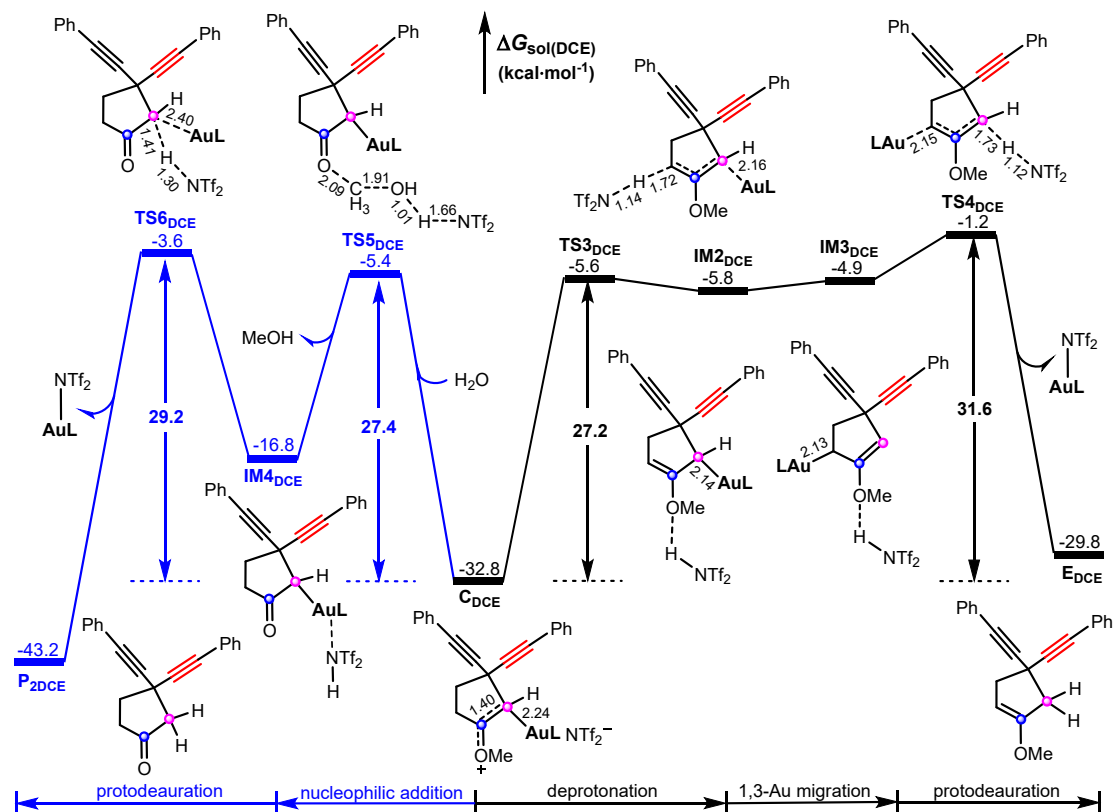

**Fig. S5** Calculated free energy profiles for the formation of cyclopentene **E<sub>DCE</sub>** (the right profile) and cyclopentanone **P<sub>2</sub>DCE** (the left profile) in DCE solvent. Bond distances (black values) are in Å.

## V. Optimized geometries and calculated the relative Gibbs free energies for key

## transition states

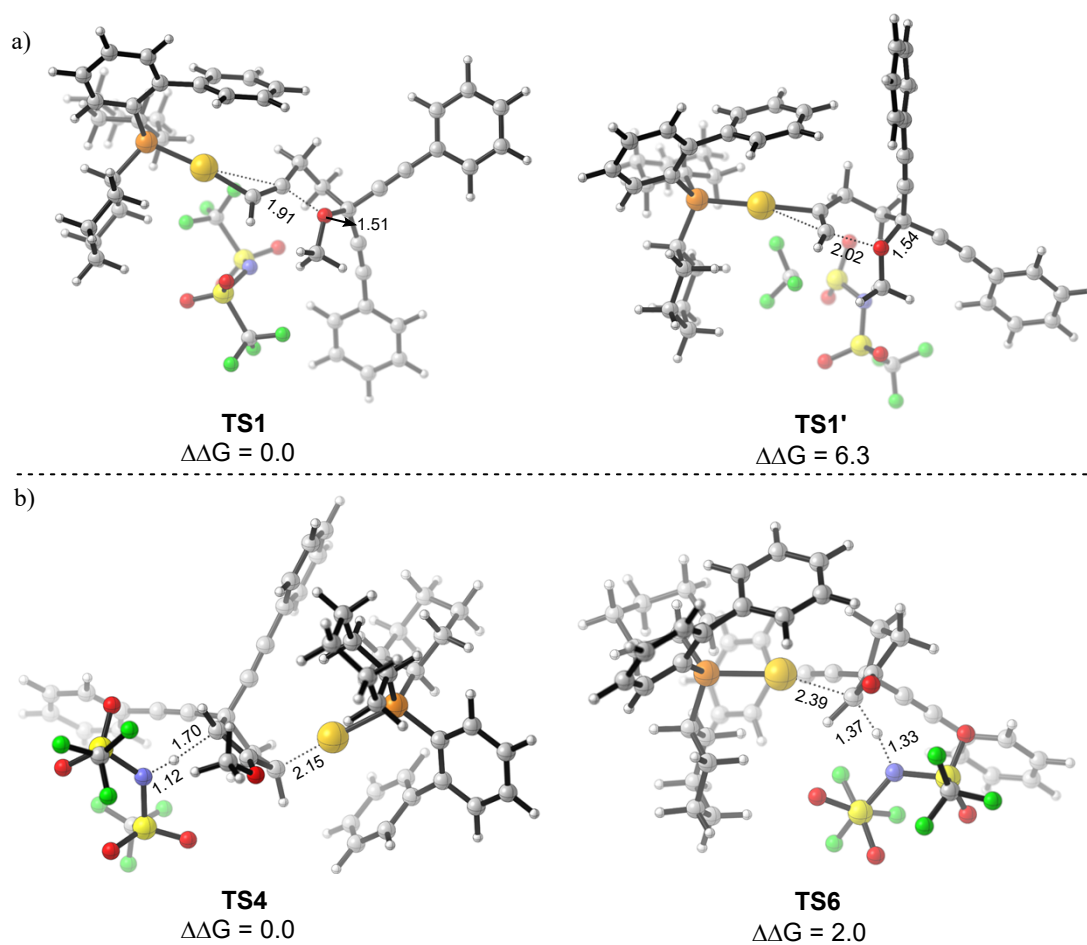

**Fig. S6** Optimized geometries and calculated the relative Gibbs free energies for (a) the regioselectivity-determining transition states (TS1 and TS1') and (b) the chemoselectivity-determining transition states (TS4 and TS6). Bond distances are in Å. Gibbs energies are in kcal mol<sup>-1</sup>.

## VI. Thermodynamic data

| Stationary point                   | Thermal correction to Gibbs free energy at B97D/SDD/6-311G(d,p) (in a.u.)<br>(1) | Single-point energy at B97D/def2-TZVP (in a.u.)<br>(2) | Gibbs free energies (G) (in a.u.)<br>(3)<br>(3)=(1)+(2) | Imaginary frequencies |
|------------------------------------|----------------------------------------------------------------------------------|--------------------------------------------------------|---------------------------------------------------------|-----------------------|
| <b>LAuCl</b>                       | 0.424806                                                                         | -1870.714999                                           | -1870.290193                                            |                       |
| <b>R</b>                           | 0.262222                                                                         | -923.8644314                                           | -923.6022094                                            |                       |
| <b>AgNTf<sub>2</sub></b>           | 0.00176                                                                          | -1974.534021                                           | -1974.532261                                            |                       |
| <b>NTf<sub>2</sub><sup>-</sup></b> | 0.005278                                                                         | -1827.342046                                           | -1827.336768                                            |                       |
| <b>AgCl</b>                        | -0.02374                                                                         | -607.5936101                                           | -607.6173501                                            |                       |
| <b>H<sub>2</sub>O</b>              | 0.002533                                                                         | -76.4260548                                            | -76.4235218                                             |                       |
| <b>MeOH</b>                        | 0.02702                                                                          | -115.7062663                                           | -115.6792463                                            |                       |
| <b>LAuNTf<sub>2</sub></b>          | 0.458788                                                                         | -3237.669934                                           | -3237.211146                                            |                       |
| <b>IM1</b>                         | 0.746639                                                                         | -4161.54027                                            | -4160.793631                                            |                       |
| <b>TS1</b>                         | 0.74758                                                                          | -4161.527926                                           | -4160.780346                                            | -188.26               |
| <b>TS1'</b>                        | 0.748965                                                                         | -4161.519163                                           | -4160.770198                                            | -208.60               |
| <b>B</b>                           | 0.75111                                                                          | -4161.562915                                           | -4160.811805                                            |                       |
| <b>TS2</b>                         | 0.752999                                                                         | -4161.562925                                           | -4160.809926                                            | -26.60                |
| <b>C</b>                           | 0.752853                                                                         | -4161.613945                                           | -4160.861092                                            |                       |
| <b>TS3</b>                         | 0.750095                                                                         | -4161.574944                                           | -4160.824849                                            | -108.58               |
| <b>IM2</b>                         | 0.74984                                                                          | -4161.577039                                           | -4160.827199                                            |                       |
| <b>IM3</b>                         | 0.752273                                                                         | -4161.577009                                           | -4160.824736                                            |                       |
| <b>TS4</b>                         | 0.748443                                                                         | -4161.571196                                           | -4160.822753                                            | -44.39                |
| <b>E</b>                           | 0.266225                                                                         | -923.91515                                             | -923.648925                                             |                       |
| <b>TS5</b>                         | 0.772026                                                                         | -4238.016476                                           | -4237.24445                                             | -384.32               |
| <b>IM4</b>                         | 0.72746                                                                          | -4122.314619                                           | -4121.587159                                            |                       |
| <b>TS6</b>                         | 0.719129                                                                         | -4122.282936                                           | -4121.563807                                            | -1114.93              |
| <b>P<sub>2</sub></b>               | 0.242671                                                                         | -884.657744                                            | -884.415073                                             |                       |
| <b>TS7</b>                         | 0.756495                                                                         | -4161.594539                                           | -4160.838044                                            | -115.36               |
| <b>F</b>                           | 0.759529                                                                         | -4161.619837                                           | -4160.860308                                            |                       |
| <b>TS8</b>                         | 0.806589                                                                         | -4277.333219                                           | -4276.52663                                             | -538.51               |
| <b>TS8'</b>                        | 0.779446                                                                         | -4238.045532                                           | -4237.266086                                            | -121.83               |
| <b>G</b>                           | 0.806184                                                                         | -4277.340296                                           | -4276.534112                                            |                       |

|                          |          |              |              |          |
|--------------------------|----------|--------------|--------------|----------|
| <b>G'</b>                | 0.780653 | -4238.052989 | -4237.272336 |          |
| <b>TS9</b>               | 0.809625 | -4277.334944 | -4276.525319 | -1033.81 |
| <b>TS9'</b>              | 0.784681 | -4238.050524 | -4237.265843 | -1044.18 |
| <b>IM5</b>               | 0.324525 | -1039.671647 | -1039.347122 |          |
| <b>IM5'</b>              | 0.298791 | -1000.393866 | -1000.095075 |          |
| <b>TS10</b>              | 0.315328 | -1076.799494 | -1076.484166 | -1368.20 |
| <b>P<sub>1</sub></b>     | 0.248479 | -884.686999  | -884.43852   |          |
| <b>TS-S1</b>             | 0.806652 | -4277.29307  | -4276.486418 | -672.30  |
| <b>IM-S1</b>             | 0.80482  | -4277.299544 | -4276.494724 |          |
| <b>TS-S2</b>             | 0.801029 | -4277.262286 | -4276.461257 | -1208.60 |
| <b>D</b>                 | 0.319256 | -1039.649243 | -1039.329987 |          |
| <b>TS-S3</b>             | 0.77277  | -4238.019446 | -4237.246676 | -541.34  |
| <b>IM-S2</b>             | 0.776238 | -4238.01982  | -4237.243582 |          |
| <b>TS-S4</b>             | 0.776402 | -4237.976759 | -4237.200357 | -1222.39 |
| <b>D'</b>                | 0.294542 | -1000.364473 | -1000.069931 |          |
| <b>TS4'</b>              | 0.746893 | -4161.536183 | -4160.78929  | -1226.97 |
| <b>C<sub>DCE</sub></b>   | 0.75385  | -4161.630249 | -4160.876399 |          |
| <b>TS3<sub>DCE</sub></b> | 0.747971 | -4161.58118  | -4160.833209 | -241.82  |
| <b>IM2<sub>DCE</sub></b> | 0.749697 | -4161.583128 | -4160.833431 |          |
| <b>IM3<sub>DCE</sub></b> | 0.750467 | -4161.582327 | -4160.83186  |          |
| <b>TS4<sub>DCE</sub></b> | 0.751533 | -4161.577465 | -4160.825932 | -61.28   |
| <b>E<sub>DCE</sub></b>   | 0.266425 | -923.918153  | -923.651728  |          |
| <b>TS5<sub>DCE</sub></b> | 0.768256 | -4238.027654 | -4237.259398 | -402.67  |
| <b>IM4<sub>DCE</sub></b> | 0.725429 | -4122.321981 | -4121.596552 |          |
| <b>TS6<sub>DCE</sub></b> | 0.718882 | -4122.294168 | -4121.575286 | -1204.79 |
| <b>P<sub>2DCE</sub></b>  | 0.242255 | -884.660996  | -884.418741  |          |
| <b>TS4<sub>gas</sub></b> | 0.748090 | -4161.525754 | -4160.777664 | -694.90  |
| <b>TS6<sub>gas</sub></b> | 0.722441 | -4122.2348   | -4121.512359 | -906.50  |

## VII. Cartesian coordinates of all structures involved in this work

### LAuCl

0 1

|   |             |            |             |
|---|-------------|------------|-------------|
| C | -1.04138600 | 2.42890400 | -1.01989900 |
| C | 0.28569700  | 1.92892500 | -0.95696100 |
| C | 1.31301800  | 2.63036000 | -1.62071700 |



|   |             |             |             |
|---|-------------|-------------|-------------|
| C | 1.04411800  | 3.79274500  | -2.34950800 |
| C | -0.26936400 | 4.26824800  | -2.43703300 |
| C | -1.29684800 | 3.58821200  | -1.77715700 |
| C | -2.17775800 | 1.77087700  | -0.31872900 |
| C | -3.18898700 | 1.13367800  | -1.05974800 |
| C | -4.21194400 | 0.43826700  | -0.40638400 |
| C | -4.24295600 | 0.38157400  | 0.99228000  |
| C | -3.25568700 | 1.03703700  | 1.73793700  |
| C | -2.22920600 | 1.72981500  | 1.08619200  |
| H | 2.33479100  | 2.26271300  | -1.58543500 |
| H | 1.85640200  | 4.31535100  | -2.85241800 |
| H | -0.49241200 | 5.16663200  | -3.01096100 |
| H | -2.31920500 | 3.95984400  | -1.82743300 |
| H | -3.14188700 | 1.14695700  | -2.14742400 |
| H | -4.96811700 | -0.08422700 | -0.98961700 |
| H | -5.02438900 | -0.18308400 | 1.49729000  |
| H | -3.27599600 | 0.99749600  | 2.82611900  |
| H | -1.45530200 | 2.23140500  | 1.66400000  |
| P | 0.70494500  | 0.35909400  | -0.07613900 |
| C | 1.34087900  | 0.92575300  | 1.59001500  |
| C | 1.20907900  | -0.16781000 | 2.67266300  |
| C | 2.76917600  | 1.50676000  | 1.52052700  |
| H | 0.65699900  | 1.74520600  | 1.85748500  |
| C | 1.66307700  | 0.37212200  | 4.04229000  |
| H | 1.82273100  | -1.03711200 | 2.39902700  |
| H | 0.16872900  | -0.51687000 | 2.71928500  |
| C | 3.20629800  | 2.03282600  | 2.90281000  |
| H | 3.46778500  | 0.72068800  | 1.19808500  |
| H | 2.81334300  | 2.31539900  | 0.77759800  |
| C | 3.09415200  | 0.93754900  | 3.97900900  |

|    |             |             |             |
|----|-------------|-------------|-------------|
| H  | 1.59760200  | -0.42836600 | 4.79317600  |
| H  | 0.97318900  | 1.17223400  | 4.35849600  |
| H  | 4.23698600  | 2.41216800  | 2.84402600  |
| H  | 2.56138200  | 2.88197800  | 3.18244500  |
| H  | 3.39001800  | 1.33721000  | 4.95981200  |
| H  | 3.79405200  | 0.12024000  | 3.73713000  |
| C  | 2.12765600  | -0.37206200 | -1.02937800 |
| C  | 2.64709800  | -1.64689600 | -0.32629900 |
| C  | 1.66298000  | -0.69664000 | -2.46804900 |
| H  | 2.94472200  | 0.36206500  | -1.06000200 |
| C  | 3.77865000  | -2.29853100 | -1.14491100 |
| H  | 1.81258200  | -2.35662200 | -0.21804100 |
| H  | 3.00749500  | -1.40868000 | 0.68204200  |
| C  | 2.79620500  | -1.35211400 | -3.27970500 |
| H  | 0.81044000  | -1.39142000 | -2.40595500 |
| H  | 1.30815700  | 0.21182300  | -2.97206000 |
| C  | 3.32206500  | -2.61806500 | -2.57937600 |
| H  | 4.11753800  | -3.21213100 | -0.63573700 |
| H  | 4.63768000  | -1.60806500 | -1.18397000 |
| H  | 2.43105000  | -1.59393800 | -4.28827500 |
| H  | 3.62271200  | -0.63125600 | -3.39673300 |
| H  | 4.15050300  | -3.05705900 | -3.15443200 |
| H  | 2.51589500  | -3.36863600 | -2.54148200 |
| Au | -0.90832000 | -1.22544400 | 0.07066900  |
| Cl | -2.42637900 | -3.03338100 | 0.22553100  |

**R**

0 1

|   |            |             |            |
|---|------------|-------------|------------|
| C | 5.47468300 | -2.01634100 | 0.61388900 |
| C | 4.31943200 | -1.32541500 | 0.98832100 |

|   |             |             |             |
|---|-------------|-------------|-------------|
| C | 3.43095500  | -0.83784400 | 0.00102900  |
| C | 3.73047300  | -1.05765400 | -1.36406900 |
| C | 4.88849000  | -1.75084600 | -1.72632700 |
| C | 5.76367400  | -2.23167200 | -0.74159200 |
| H | 6.15153700  | -2.38788400 | 1.38206500  |
| H | 4.09048200  | -1.15625500 | 2.03859500  |
| H | 3.04857800  | -0.68437700 | -2.12583500 |
| H | 5.10899100  | -1.91564300 | -2.78016900 |
| H | 6.66496500  | -2.77147800 | -1.02858600 |
| C | 2.25014100  | -0.13336200 | 0.37953100  |
| C | 1.24489900  | 0.45984600  | 0.72129800  |
| C | 0.01809400  | 1.19465100  | 1.07473800  |
| O | 0.07154800  | 1.35821500  | 2.51582000  |
| C | -1.05662200 | 2.02107800  | 3.10559800  |
| H | -0.93906300 | 1.88868900  | 4.18770100  |
| H | -1.07049500 | 3.09899300  | 2.87561300  |
| H | -2.00957400 | 1.56689600  | 2.78801300  |
| C | -1.15595600 | 0.39411400  | 0.66482100  |
| C | -2.13711500 | -0.24719200 | 0.33522400  |
| C | -3.27526000 | -1.01619600 | -0.04778600 |
| C | -4.23529600 | -0.48575600 | -0.94178800 |
| C | -3.45784700 | -2.32303000 | 0.46331000  |
| C | -5.34632000 | -1.24771400 | -1.31244600 |
| H | -4.09765400 | 0.51966600  | -1.33561500 |
| C | -4.57395600 | -3.07475300 | 0.08782400  |
| H | -2.71871000 | -2.73180200 | 1.14943600  |
| C | -5.52012900 | -2.54165400 | -0.79982000 |
| H | -6.07904700 | -0.83118400 | -2.00225100 |
| H | -4.70495400 | -4.07954300 | 0.48714700  |
| H | -6.38835000 | -3.13153400 | -1.09032000 |

|   |             |            |             |
|---|-------------|------------|-------------|
| C | -0.00338400 | 2.58982700 | 0.36783800  |
| H | 0.84499300  | 3.16300300 | 0.76226600  |
| H | -0.93262300 | 3.09882300 | 0.65008900  |
| C | 0.07916100  | 2.50128500 | -1.17317400 |
| H | 1.01908100  | 2.00717500 | -1.46039000 |
| H | -0.74147600 | 1.86885500 | -1.54525800 |
| C | 0.00508000  | 3.82033800 | -1.79904900 |
| C | -0.06037300 | 4.92712800 | -2.28879000 |
| H | -0.11600500 | 5.89884900 | -2.73053700 |

**AgNTf<sub>2</sub>**

0 1

|    |             |             |             |
|----|-------------|-------------|-------------|
| N  | -0.00105000 | 0.05309700  | 0.00021600  |
| S  | -1.18862500 | -0.72031400 | -0.89883200 |
| S  | 1.18501300  | -0.72291000 | 0.89909000  |
| O  | -0.87094600 | -2.09751900 | -1.26943300 |
| O  | -1.63909800 | 0.26345900  | -1.89389400 |
| O  | 1.63890500  | 0.26082100  | 1.89276800  |
| O  | 0.86384100  | -2.09877300 | 1.27155600  |
| C  | -2.60531800 | -0.79070600 | 0.39619300  |
| C  | 2.60110100  | -0.79833900 | -0.39630700 |
| F  | -2.22348000 | -1.49188900 | 1.46742600  |
| F  | -2.91153600 | 0.46799400  | 0.77696000  |
| F  | -3.68483400 | -1.35673300 | -0.15586500 |
| F  | 2.90829800  | 0.45909000  | -0.78076900 |
| F  | 3.68032800  | -1.36356800 | 0.15711300  |
| F  | 2.21843200  | -1.50221600 | -1.46539200 |
| Ag | 0.00561600  | 2.22800400  | -0.00017400 |

**NTf<sub>2</sub><sup>-</sup>**

-1 1

|   |             |             |             |
|---|-------------|-------------|-------------|
| N | 0.00001900  | -0.00001600 | 0.85089900  |
| S | 1.14426000  | -0.87892600 | 0.08710300  |
| S | -1.14426700 | 0.87893000  | 0.08721700  |
| O | 0.88224500  | -1.28565700 | -1.30453300 |
| O | 1.64262300  | -1.87809300 | 1.04627200  |
| O | -1.64262300 | 1.87799500  | 1.04649600  |
| O | -0.88229900 | 1.28579700  | -1.30438800 |
| C | 2.58338500  | 0.38270800  | -0.04238000 |
| C | -2.58337400 | -0.38271600 | -0.04235100 |
| F | 2.22017100  | 1.46448600  | -0.75575000 |
| F | 2.97418100  | 0.78811100  | 1.18199900  |
| F | 3.64235900  | -0.19660900 | -0.65447300 |
| F | -2.97414500 | -0.78823100 | 1.18199900  |
| F | -3.64236600 | 0.19664300  | -0.65437500 |
| F | -2.22016000 | -1.46442600 | -0.75582200 |

**AgCl**

0 1

|    |            |            |             |
|----|------------|------------|-------------|
| Ag | 0.00000000 | 0.00000000 | 0.63130600  |
| Cl | 0.00000000 | 0.00000000 | -1.74537500 |

**H<sub>2</sub>O**

0 1

|   |             |             |            |
|---|-------------|-------------|------------|
| O | 0.00000000  | 0.12057500  | 0.00000000 |
| H | 0.75538100  | -0.48229900 | 0.00000000 |
| H | -0.75538100 | -0.48230200 | 0.00000000 |

**LAuNTf<sub>2</sub>**

0 1

|   |             |            |             |
|---|-------------|------------|-------------|
| C | -2.54278300 | 2.54407900 | -0.95678600 |
|---|-------------|------------|-------------|

|   |             |             |             |
|---|-------------|-------------|-------------|
| C | -2.99723300 | 1.53437900  | -0.06789400 |
| C | -4.16914500 | 1.75493100  | 0.68428800  |
| C | -4.87641100 | 2.95661200  | 0.58231100  |
| C | -4.40997600 | 3.96617200  | -0.26790800 |
| C | -3.25415100 | 3.75643900  | -1.02564300 |
| C | -1.33381800 | 2.36591400  | -1.80702500 |
| C | -0.17379300 | 3.11532600  | -1.54545700 |
| C | 1.00098800  | 2.87205600  | -2.26672600 |
| C | 1.02608100  | 1.88721000  | -3.26041900 |
| C | -0.13504800 | 1.15957100  | -3.54958800 |
| C | -1.30978400 | 1.40030600  | -2.83017700 |
| H | -4.52773000 | 0.99287300  | 1.37173300  |
| H | -5.77923700 | 3.10492200  | 1.17270100  |
| H | -4.94583400 | 4.91106800  | -0.34563600 |
| H | -2.89400200 | 4.53179800  | -1.70003700 |
| H | -0.18336800 | 3.84962800  | -0.74228900 |
| H | 1.90411700  | 3.43050900  | -2.03153900 |
| H | 1.94865500  | 1.67506000  | -3.79586600 |
| H | -0.11902100 | 0.39138900  | -4.32073000 |
| H | -2.21065200 | 0.83055800  | -3.04865100 |
| P | -2.06722400 | -0.03631400 | 0.18302400  |
| C | -2.88469900 | -1.27543200 | -0.95144800 |
| C | -1.92727100 | -2.41602300 | -1.36004500 |
| C | -4.21680700 | -1.80540100 | -0.37757800 |
| H | -3.11385600 | -0.68778300 | -1.85169600 |
| C | -2.62157500 | -3.38005000 | -2.34081500 |
| H | -1.60563100 | -2.96754300 | -0.46606400 |
| H | -1.02297800 | -1.99227900 | -1.81551600 |
| C | -4.88754600 | -2.76903900 | -1.37763600 |
| H | -4.02163000 | -2.34311800 | 0.56211300  |

|    |             |             |             |
|----|-------------|-------------|-------------|
| H  | -4.89060200 | -0.96794300 | -0.14789500 |
| C  | -3.94119800 | -3.92102400 | -1.76089400 |
| H  | -1.93904600 | -4.20591600 | -2.58725000 |
| H  | -2.83379200 | -2.84196200 | -3.27963500 |
| H  | -5.81761600 | -3.16203300 | -0.94164800 |
| H  | -5.16410500 | -2.20916700 | -2.28584000 |
| H  | -4.43054800 | -4.58802400 | -2.48519400 |
| H  | -3.72214600 | -4.52207200 | -0.86272400 |
| C  | -2.38180100 | -0.54602100 | 1.94591600  |
| C  | -1.70195900 | -1.90379100 | 2.24044200  |
| C  | -1.84908000 | 0.54854500  | 2.89995800  |
| H  | -3.46590800 | -0.66477400 | 2.08200900  |
| C  | -1.90095800 | -2.30374900 | 3.71514100  |
| H  | -0.62519100 | -1.81532500 | 2.03050700  |
| H  | -2.10165500 | -2.68515800 | 1.58249500  |
| C  | -2.04498300 | 0.13906500  | 4.37203000  |
| H  | -0.77519400 | 0.68791700  | 2.70365200  |
| H  | -2.34628700 | 1.50660600  | 2.70078100  |
| C  | -1.37305100 | -1.21416900 | 4.66518800  |
| H  | -1.38917100 | -3.25851300 | 3.90321500  |
| H  | -2.97509500 | -2.46626800 | 3.90559500  |
| H  | -1.63270900 | 0.92187500  | 5.02457000  |
| H  | -3.12395100 | 0.06648400  | 4.58992200  |
| H  | -1.54137500 | -1.50672800 | 5.71181100  |
| H  | -0.28566500 | -1.11101100 | 4.52325400  |
| Au | 0.18235700  | 0.03918700  | -0.06248100 |
| N  | 2.33410700  | -0.10413600 | -0.02790900 |
| S  | 3.09289800  | -1.05842800 | -1.18862900 |
| S  | 3.12971000  | 0.48116300  | 1.34322100  |
| O  | 4.53876100  | -0.86227000 | -1.27508300 |

|   |            |             |             |
|---|------------|-------------|-------------|
| O | 2.25470600 | -1.03292100 | -2.39069000 |
| O | 2.19365200 | 0.43463200  | 2.47250400  |
| O | 4.50533600 | 0.00794300  | 1.48857500  |
| C | 2.80510400 | -2.80340800 | -0.42817900 |
| C | 3.23082100 | 2.33722200  | 0.86324500  |
| F | 3.24659700 | -2.83895600 | 0.83724000  |
| F | 1.48926400 | -3.09244600 | -0.43889300 |
| F | 3.45973000 | -3.72002500 | -1.15605000 |
| F | 1.99493100 | 2.86607100  | 0.82082800  |
| F | 3.95316600 | 2.98879800  | 1.78731500  |
| F | 3.81339500 | 2.47785800  | -0.33620700 |

**IM1**

0 1

|   |            |             |             |
|---|------------|-------------|-------------|
| C | 4.51635600 | 1.92434100  | -2.00150300 |
| C | 4.99726300 | 0.85556300  | -1.19978000 |
| C | 6.35940700 | 0.49775000  | -1.27246500 |
| C | 7.23611300 | 1.16635200  | -2.13146200 |
| C | 6.75719500 | 2.20053600  | -2.94426300 |
| C | 5.41073900 | 2.56971400  | -2.87625200 |
| C | 3.09771200 | 2.37732000  | -1.96582100 |
| C | 2.26068400 | 2.14160100  | -3.07261000 |
| C | 0.89936300 | 2.46009300  | -3.00996600 |
| C | 0.35934400 | 3.03153100  | -1.85085000 |
| C | 1.19421900 | 3.30501200  | -0.76000300 |
| C | 2.55560300 | 2.98015900  | -0.81553900 |
| H | 6.74271800 | -0.31750900 | -0.66397900 |
| H | 8.28394300 | 0.87314800  | -2.16965000 |
| H | 7.42962600 | 2.72106900  | -3.62456500 |
| H | 5.03444400 | 3.38158300  | -3.49660100 |



|   |             |             |             |
|---|-------------|-------------|-------------|
| H | 2.67521900  | 1.66768900  | -3.96130500 |
| H | 0.25251100  | 2.23969100  | -3.85781600 |
| H | -0.70656400 | 3.23299300  | -1.78798100 |
| H | 0.78142300  | 3.76494700  | 0.13566700  |
| H | 3.19755000  | 3.17826200  | 0.04092300  |
| P | 3.89930500  | -0.11519000 | -0.08416100 |
| C | 4.12955900  | 0.65083400  | 1.60373000  |
| C | 2.90961000  | 0.43501600  | 2.52599600  |
| C | 5.44998800  | 0.21718000  | 2.27612600  |
| H | 4.19968600  | 1.72596400  | 1.37985100  |
| C | 3.11355000  | 1.16500900  | 3.86634400  |
| H | 2.76333100  | -0.63757800 | 2.70825600  |
| H | 2.00107600  | 0.80249200  | 2.03016500  |
| C | 5.63094500  | 0.95449900  | 3.61902000  |
| H | 5.42718600  | -0.86683900 | 2.46030400  |
| H | 6.30024400  | 0.42495200  | 1.61172800  |
| C | 4.42383900  | 0.73021800  | 4.54851700  |
| H | 2.25370700  | 0.97055900  | 4.52263300  |
| H | 3.14573700  | 2.25163400  | 3.68092900  |
| H | 6.55816200  | 0.61438700  | 4.10205600  |
| H | 5.74141600  | 2.03317000  | 3.42172600  |
| H | 4.56350800  | 1.28018500  | 5.49015100  |
| H | 4.35879900  | -0.34026900 | 4.80384600  |
| C | 4.56571700  | -1.84825800 | -0.08122200 |
| C | 3.75519700  | -2.71740400 | 0.90668700  |
| C | 4.47378400  | -2.41924800 | -1.51564100 |
| H | 5.61531400  | -1.82572900 | 0.24351500  |
| C | 4.20652800  | -4.18882200 | 0.85739400  |
| H | 2.69570300  | -2.66064700 | 0.63096900  |
| H | 3.84680500  | -2.32848800 | 1.92803500  |

|    |             |             |             |
|----|-------------|-------------|-------------|
| C  | 4.92546200  | -3.89147000 | -1.55410600 |
| H  | 3.42411000  | -2.35410800 | -1.84769500 |
| H  | 5.07332700  | -1.81332100 | -2.20771700 |
| C  | 4.11018500  | -4.75117400 | -0.57138400 |
| H  | 3.58231600  | -4.77754600 | 1.54402100  |
| H  | 5.24776200  | -4.26522400 | 1.21207700  |
| H  | 4.82420400  | -4.27635600 | -2.57876300 |
| H  | 5.99450900  | -3.94847500 | -1.28929800 |
| H  | 4.45913200  | -5.79329300 | -0.59544400 |
| H  | 3.05356900  | -4.75358300 | -0.88348400 |
| Au | 1.67160600  | -0.24012200 | -0.67170400 |
| C  | -0.29482500 | 7.40632400  | 0.53463700  |
| C  | -1.05665100 | 6.31731000  | 0.10369800  |
| C  | -1.38625300 | 5.27867200  | 1.00579700  |
| C  | -0.94219400 | 5.36379600  | 2.34682500  |
| C  | -0.18299100 | 6.45926600  | 2.76703500  |
| C  | 0.14474200  | 7.48170100  | 1.86447200  |
| H  | -0.04306000 | 8.19832800  | -0.16919200 |
| H  | -1.39384200 | 6.25146200  | -0.92860800 |
| H  | -1.19853800 | 4.56794000  | 3.04383300  |
| H  | 0.15212600  | 6.51603000  | 3.80184600  |
| H  | 0.73779600  | 8.33288400  | 2.19590100  |
| C  | -2.11292200 | 4.13699800  | 0.55815800  |
| C  | -2.68787900 | 3.14514600  | 0.15323200  |
| C  | -3.25573800 | 1.86233100  | -0.29615000 |
| O  | -2.79007800 | 1.70063300  | -1.65977300 |
| C  | -3.32171700 | 0.55503700  | -2.35277300 |
| H  | -2.80621400 | 0.53911600  | -3.31994500 |
| H  | -3.11796500 | -0.38326300 | -1.82458100 |
| H  | -4.40519000 | 0.66063400  | -2.51738700 |

|   |              |             |             |
|---|--------------|-------------|-------------|
| C | -4.72867000  | 1.88695000  | -0.21420800 |
| C | -5.94110100  | 1.79373700  | -0.16826800 |
| C | -7.36055900  | 1.67299400  | -0.11003100 |
| C | -7.96213800  | 0.39236600  | -0.07357300 |
| C | -8.18327700  | 2.82360600  | -0.09244500 |
| C | -9.35314300  | 0.27324800  | -0.02049900 |
| H | -7.32941000  | -0.49277900 | -0.08976600 |
| C | -9.57312000  | 2.69162200  | -0.03695800 |
| H | -7.72035200  | 3.80813500  | -0.12096900 |
| C | -10.16210500 | 1.41910100  | -0.00173200 |
| H | -9.80706200  | -0.71635900 | 0.00646800  |
| H | -10.19846400 | 3.58331500  | -0.02217300 |
| H | -11.24599000 | 1.32083300  | 0.04049800  |
| C | -2.74307900  | 0.71393600  | 0.63437800  |
| H | -3.19652700  | -0.23348900 | 0.33368000  |
| H | -3.08129600  | 0.93107000  | 1.65388100  |
| C | -1.20359700  | 0.57453300  | 0.66948300  |
| H | -0.73494600  | 1.55840800  | 0.80765100  |
| H | -0.94710600  | -0.05548500 | 1.52924700  |
| C | -0.65751000  | -0.06164400 | -0.52825000 |
| C | -0.32039400  | -0.67707000 | -1.54382000 |
| H | -0.36489300  | -1.25215400 | -2.44793100 |
| N | -2.30598100  | -2.54183900 | 0.38630900  |
| S | -1.87792100  | -3.07398500 | 1.86124500  |
| S | -2.73018500  | -3.50715100 | -0.86049500 |
| O | -2.33540300  | -4.40791000 | 2.27132500  |
| O | -2.02257100  | -1.93867200 | 2.78898600  |
| O | -2.41148900  | -2.79655500 | -2.11296400 |
| O | -2.41042400  | -4.93789600 | -0.75027100 |
| C | 0.04642900   | -3.24592900 | 1.66451200  |

|   |             |             |             |
|---|-------------|-------------|-------------|
| C | -4.64217900 | -3.38388900 | -0.74763700 |
| F | 0.54556300  | -4.12025400 | 2.55599200  |
| F | 0.38107300  | -3.66199400 | 0.42518800  |
| F | 0.63907500  | -2.04642500 | 1.88208600  |
| F | -5.03786600 | -2.10369200 | -0.93360000 |
| F | -5.20916100 | -4.14757700 | -1.69973800 |
| F | -5.07197600 | -3.79401600 | 0.45634700  |

**TS1**

0 1

|   |             |            |             |
|---|-------------|------------|-------------|
| C | 4.80033600  | 2.86387000 | -0.89115800 |
| C | 5.19154400  | 1.51836800 | -0.66584600 |
| C | 6.50385800  | 1.12463200 | -0.99967500 |
| C | 7.41354500  | 2.02623600 | -1.55948200 |
| C | 7.01665700  | 3.34452200 | -1.81193400 |
| C | 5.72202200  | 3.75175100 | -1.47978300 |
| C | 3.45791800  | 3.39273300 | -0.52560400 |
| C | 2.58567500  | 3.85787100 | -1.52623500 |
| C | 1.31458400  | 4.33664700 | -1.19246000 |
| C | 0.90480800  | 4.36773100 | 0.14585300  |
| C | 1.76765400  | 3.91132300 | 1.15057000  |
| C | 3.03753800  | 3.42793700 | 0.81686900  |
| H | 6.82018500  | 0.09736600 | -0.83946600 |
| H | 8.42121000  | 1.69516100 | -1.80618700 |
| H | 7.71213200  | 4.05358100 | -2.25860400 |
| H | 5.41152400  | 4.78068700 | -1.65560400 |
| H | 2.89944000  | 3.81468200 | -2.56785000 |
| H | 0.63994600  | 4.67410200 | -1.97767100 |
| H | -0.08454600 | 4.74175100 | 0.40244400  |
| H | 1.45468900  | 3.93256200 | 2.19366700  |

|   |            |             |             |
|---|------------|-------------|-------------|
| H | 3.70979400 | 3.07417800  | 1.59591600  |
| P | 4.02474500 | 0.24360200  | -0.01369500 |
| C | 4.43850800 | 0.12765100  | 1.80546600  |
| C | 3.25332400 | -0.42073200 | 2.62607500  |
| C | 5.74037300 | -0.65008600 | 2.08698100  |
| H | 4.59761400 | 1.17731000  | 2.09758000  |
| C | 3.58092100 | -0.41606200 | 4.13014300  |
| H | 3.03590400 | -1.44758700 | 2.31040500  |
| H | 2.35396200 | 0.17277300  | 2.41897700  |
| C | 6.05249700 | -0.64691800 | 3.59796200  |
| H | 5.62289700 | -1.68877600 | 1.74387100  |
| H | 6.57687100 | -0.20691300 | 1.52921200  |
| C | 4.87310700 | -1.20304000 | 4.41732200  |
| H | 2.73641300 | -0.84488900 | 4.68808700  |
| H | 3.70513300 | 0.62525900  | 4.47200200  |
| H | 6.96356700 | -1.23311000 | 3.78712900  |
| H | 6.25914200 | 0.38806400  | 3.91716300  |
| H | 5.10929000 | -1.17241500 | 5.49080600  |
| H | 4.71442200 | -2.26052500 | 4.14941700  |
| C | 4.51777700 | -1.33761200 | -0.86426000 |
| C | 3.65743100 | -2.51041000 | -0.34680200 |
| C | 4.33356400 | -1.16136100 | -2.39022200 |
| H | 5.57328400 | -1.54980100 | -0.64319400 |
| C | 3.98665100 | -3.81301500 | -1.10027900 |
| H | 2.59924300 | -2.26513400 | -0.50447200 |
| H | 3.80552600 | -2.64864800 | 0.73131700  |
| C | 4.66060100 | -2.46765500 | -3.13861700 |
| H | 3.28353300 | -0.88863200 | -2.58342200 |
| H | 4.95950900 | -0.33844000 | -2.76027200 |
| C | 3.80324200 | -3.63517900 | -2.61750300 |

|    |             |             |             |
|----|-------------|-------------|-------------|
| H  | 3.33666500  | -4.61651400 | -0.72796500 |
| H  | 5.02942200  | -4.10472000 | -0.88885800 |
| H  | 4.49831400  | -2.32047200 | -4.21631800 |
| H  | 5.72840000  | -2.70748800 | -2.99932200 |
| H  | 4.06085200  | -4.56490300 | -3.14534900 |
| H  | 2.74226800  | -3.42459900 | -2.82390400 |
| Au | 1.78038200  | 0.57854500  | -0.46492300 |
| C  | -7.10086900 | 6.77225500  | -0.64832300 |
| C  | -6.54574600 | 5.49121100  | -0.60535800 |
| C  | -5.32799700 | 5.26711400  | 0.08006600  |
| C  | -4.68316700 | 6.35475600  | 0.71519300  |
| C  | -5.24795600 | 7.63149400  | 0.66581200  |
| C  | -6.45605400 | 7.84448000  | -0.01421100 |
| H  | -8.03866700 | 6.93498400  | -1.17752000 |
| H  | -7.04145100 | 4.65510100  | -1.09456300 |
| H  | -3.74714700 | 6.18407400  | 1.24395500  |
| H  | -4.74565000 | 8.46237900  | 1.15903800  |
| H  | -6.89325200 | 8.84126300  | -0.04895700 |
| C  | -4.76406300 | 3.95958100  | 0.12997700  |
| C  | -4.30239300 | 2.83395100  | 0.15759500  |
| C  | -3.74488100 | 1.48756100  | 0.24672700  |
| O  | -2.85847100 | 1.33886100  | -1.01334600 |
| C  | -3.15355300 | 0.23746200  | -1.91916100 |
| H  | -2.45294400 | 0.35609400  | -2.75019800 |
| H  | -3.00776400 | -0.71931500 | -1.41460500 |
| H  | -4.17989500 | 0.35391700  | -2.28420900 |
| C  | -4.76979900 | 0.46499200  | 0.29899100  |
| C  | -5.52860100 | -0.48563500 | 0.31809600  |
| C  | -6.31995200 | -1.66750400 | 0.33014300  |
| C  | -7.70507500 | -1.64188900 | 0.04703800  |

|   |             |             |             |
|---|-------------|-------------|-------------|
| C | -5.68432700 | -2.90173400 | 0.60483000  |
| C | -8.43482600 | -2.83337200 | 0.03925300  |
| H | -8.19141300 | -0.69118000 | -0.16356300 |
| C | -6.42267700 | -4.08595500 | 0.58312100  |
| H | -4.62155700 | -2.90473600 | 0.82657000  |
| C | -7.79704100 | -4.05527800 | 0.30333100  |
| H | -9.50194500 | -2.81083400 | -0.17742600 |
| H | -5.92240200 | -5.03155600 | 0.78472900  |
| H | -8.37023300 | -4.98142200 | 0.28965500  |
| C | -2.71818900 | 1.33504900  | 1.40785500  |
| H | -2.57761200 | 0.26814900  | 1.60491100  |
| H | -3.10663100 | 1.82420800  | 2.30758800  |
| C | -1.40430600 | 1.96580700  | 0.92167300  |
| H | -1.51582700 | 3.05233200  | 0.80375500  |
| H | -0.58806900 | 1.77160800  | 1.62598400  |
| C | -1.05820900 | 1.32568900  | -0.35519200 |
| C | -0.21243900 | 0.70816300  | -1.09861600 |
| H | -0.44826700 | 0.18881000  | -2.02411000 |
| N | -1.69845300 | -2.30579000 | 0.03995400  |
| S | -1.11779300 | -3.17532900 | -1.21913100 |
| S | -1.65475000 | -2.81018400 | 1.58934500  |
| O | -0.17535600 | -4.26430900 | -0.91913700 |
| O | -0.80167200 | -2.22993900 | -2.30426800 |
| O | -2.67157900 | -2.03932000 | 2.32641600  |
| O | -1.52534200 | -4.25342100 | 1.83780300  |
| C | -2.72363700 | -4.03562600 | -1.83054400 |
| C | 0.00601300  | -2.05110900 | 2.18283000  |
| F | -3.26625900 | -4.78436900 | -0.85357300 |
| F | -3.62776200 | -3.11118200 | -2.21800700 |
| F | -2.44441700 | -4.82840400 | -2.88215400 |

|   |             |             |            |
|---|-------------|-------------|------------|
| F | -0.04895000 | -0.70127200 | 2.14443500 |
| F | 0.27394000  | -2.42326500 | 3.45047100 |
| F | 1.01074300  | -2.46563800 | 1.39214800 |

**TS1'**

0 1

|   |            |             |             |
|---|------------|-------------|-------------|
| C | 5.41613000 | 1.27995000  | -0.85364400 |
| C | 5.31973900 | -0.13749700 | -0.88379700 |
| C | 6.34102500 | -0.88176700 | -1.50899000 |
| C | 7.43300800 | -0.24979500 | -2.11134300 |
| C | 7.51378300 | 1.14755600  | -2.10768200 |
| C | 6.51276300 | 1.89819200  | -1.48452700 |
| C | 4.39856100 | 2.14483700  | -0.19285900 |
| C | 3.59897600 | 3.00594000  | -0.96748600 |
| C | 2.58094600 | 3.75750800  | -0.37031300 |
| C | 2.35716400 | 3.66951700  | 1.00905500  |
| C | 3.16550200 | 2.83663100  | 1.79281300  |
| C | 4.18274800 | 2.08178500  | 1.19632700  |
| H | 6.28036600 | -1.96684400 | -1.54197600 |
| H | 8.20887900 | -0.84746000 | -2.58728100 |
| H | 8.35488600 | 1.65097600  | -2.58201600 |
| H | 6.57702600 | 2.98512400  | -1.46493000 |
| H | 3.75655300 | 3.05133300  | -2.04413600 |
| H | 1.95027700 | 4.40376000  | -0.97700900 |
| H | 1.55850400 | 4.25184100  | 1.46320700  |
| H | 3.00353700 | 2.76954600  | 2.86785900  |
| H | 4.80840000 | 1.43393700  | 1.80623200  |
| P | 3.87433300 | -1.03868600 | -0.17726100 |
| C | 4.42351400 | -1.54061900 | 1.53676900  |
| C | 3.23289100 | -1.68763500 | 2.50828400  |



|   |            |             |             |
|---|------------|-------------|-------------|
| C | 5.33103400 | -2.78960800 | 1.53647500  |
| H | 5.03193600 | -0.68711300 | 1.87008100  |
| C | 3.73249100 | -2.00968900 | 3.92878600  |
| H | 2.57002900 | -2.48987900 | 2.16101200  |
| H | 2.63908900 | -0.76333200 | 2.51067000  |
| C | 5.81245800 | -3.10334100 | 2.96788000  |
| H | 4.76921400 | -3.65141400 | 1.14786400  |
| H | 6.19383700 | -2.62884700 | 0.87453100  |
| C | 4.62557000 | -3.26359600 | 3.93650600  |
| H | 2.87121900 | -2.14657400 | 4.59796000  |
| H | 4.30968300 | -1.15085900 | 4.31055000  |
| H | 6.42698900 | -4.01513800 | 2.95701900  |
| H | 6.45701200 | -2.27980900 | 3.31658700  |
| H | 4.99119200 | -3.46542400 | 4.95364700  |
| H | 4.02322300 | -4.13454500 | 3.62927100  |
| C | 3.65973900 | -2.57083000 | -1.20705000 |
| C | 2.49488300 | -3.41602900 | -0.64248800 |
| C | 3.36509900 | -2.16483300 | -2.66968900 |
| H | 4.58551500 | -3.16082700 | -1.16010500 |
| C | 2.23431900 | -4.65645100 | -1.51662600 |
| H | 1.59268700 | -2.79195200 | -0.63581400 |
| H | 2.69407100 | -3.71611800 | 0.39332800  |
| C | 3.09369300 | -3.40363800 | -3.54435900 |
| H | 2.47358900 | -1.51584000 | -2.67211200 |
| H | 4.19679600 | -1.57958800 | -3.08293000 |
| C | 1.94403800 | -4.25278400 | -2.97228100 |
| H | 1.38840600 | -5.21873100 | -1.09908600 |
| H | 3.11675400 | -5.31731000 | -1.48758800 |
| H | 2.86257900 | -3.08236900 | -4.57037700 |
| H | 4.00904200 | -4.01689200 | -3.59437100 |

|    |             |             |             |
|----|-------------|-------------|-------------|
| H  | 1.78372300  | -5.14626500 | -3.59241300 |
| H  | 1.01142200  | -3.66619900 | -2.99864100 |
| Au | 1.86752000  | 0.10664900  | -0.19801800 |
| C  | 0.97833500  | 7.66313400  | -0.72795100 |
| C  | 0.13748900  | 6.55950000  | -0.89317500 |
| C  | -0.44360100 | 5.93388800  | 0.23481600  |
| C  | -0.17234000 | 6.44737100  | 1.52471500  |
| C  | 0.66718100  | 7.55392200  | 1.67710100  |
| C  | 1.24806200  | 8.16169800  | 0.55471700  |
| H  | 1.42422000  | 8.13534900  | -1.60213500 |
| H  | -0.07701600 | 6.16937600  | -1.88617600 |
| H  | -0.62229700 | 5.97002300  | 2.39321800  |
| H  | 0.87096600  | 7.94111000  | 2.67436200  |
| H  | 1.90492700  | 9.02122700  | 0.67889800  |
| C  | -1.25666800 | 4.77496300  | 0.07469500  |
| C  | -1.91879400 | 3.76624100  | -0.07324800 |
| C  | -2.64391100 | 2.49941800  | -0.18133300 |
| O  | -2.21367900 | 1.92664800  | -1.51089800 |
| C  | -3.00798100 | 0.78828100  | -1.97703100 |
| H  | -2.44323700 | 0.37011700  | -2.81668400 |
| H  | -3.12928200 | 0.03608200  | -1.19536500 |
| H  | -3.98238000 | 1.14884800  | -2.32176000 |
| C  | -4.09499200 | 2.67036000  | -0.18652500 |
| C  | -5.30867500 | 2.58621100  | -0.16509400 |
| C  | -6.71546500 | 2.36730500  | -0.14303400 |
| C  | -7.18722400 | 1.04260000  | 0.02599400  |
| C  | -7.64280800 | 3.42279200  | -0.29775400 |
| C  | -8.55951400 | 0.78648300  | 0.03554400  |
| H  | -6.47088200 | 0.23329100  | 0.14120700  |
| C  | -9.01401300 | 3.15326800  | -0.28023200 |

|   |              |             |             |
|---|--------------|-------------|-------------|
| H | -7.27841600  | 4.43988000  | -0.42941900 |
| C | -9.47534300  | 1.83850700  | -0.11531900 |
| H | -8.91071000  | -0.23658900 | 0.15964900  |
| H | -9.72536000  | 3.96965600  | -0.39748500 |
| H | -10.54522700 | 1.63447300  | -0.10589900 |
| C | -2.26747100  | 1.51849100  | 0.97824600  |
| H | -2.76007100  | 0.56234000  | 0.78084500  |
| H | -2.70730400  | 1.92308100  | 1.89736500  |
| C | -0.76124200  | 1.30472700  | 1.19079500  |
| H | -0.29560800  | 2.18832200  | 1.65078200  |
| H | -0.62385400  | 0.46844900  | 1.88452000  |
| C | -0.02637500  | 1.03927900  | -0.08939300 |
| C | -0.32029000  | 1.23575900  | -1.30956200 |
| H | -0.12306400  | 1.23041100  | -2.36477500 |
| N | -3.61527400  | -1.83986700 | 0.38749100  |
| S | -2.65317200  | -2.43221700 | 1.57003800  |
| S | -4.20363300  | -2.78612200 | -0.81515300 |
| O | -2.99753200  | -3.74916700 | 2.12421800  |
| O | -2.39546600  | -1.30817300 | 2.48605100  |
| O | -4.60383900  | -1.89127700 | -1.91349000 |
| O | -3.42208200  | -3.99942100 | -1.11430800 |
| C | -0.92910100  | -2.71227300 | 0.68792300  |
| C | -5.88487600  | -3.40976900 | -0.11858700 |
| F | -0.71090600  | -4.00895500 | 0.43031500  |
| F | -0.85476900  | -2.02303000 | -0.46991200 |
| F | 0.05829600   | -2.27266100 | 1.50529200  |
| F | -6.63745500  | -2.36324600 | 0.28234400  |
| F | -6.54730900  | -4.06674100 | -1.09139500 |
| F | -5.70752900  | -4.23533900 | 0.92031200  |

**B**

0 1

|   |            |             |             |
|---|------------|-------------|-------------|
| C | 3.78483800 | -2.76591100 | -0.04317200 |
| C | 3.93171100 | -1.48636300 | 0.55329900  |
| C | 4.92783100 | -1.30509900 | 1.53417000  |
| C | 5.74821100 | -2.35886200 | 1.94663400  |
| C | 5.57459300 | -3.62989100 | 1.38733400  |
| C | 4.60221700 | -3.82347200 | 0.40288800  |
| C | 2.81990400 | -3.05305100 | -1.14042100 |
| C | 1.77158900 | -3.96989200 | -0.94622000 |
| C | 0.85727300 | -4.22582200 | -1.97214600 |
| C | 0.99102800 | -3.58884900 | -3.21236500 |
| C | 2.04839300 | -2.69505900 | -3.42309300 |
| C | 2.95357700 | -2.42479000 | -2.39233700 |
| H | 5.04791800 | -0.33260700 | 2.00335900  |
| H | 6.50593900 | -2.18878300 | 2.71013500  |
| H | 6.19564900 | -4.46438100 | 1.71017000  |
| H | 4.47460900 | -4.80457000 | -0.05234000 |
| H | 1.65240100 | -4.44351000 | 0.02538300  |
| H | 0.03210600 | -4.91486900 | -1.79880700 |
| H | 0.27204600 | -3.78482900 | -4.00572500 |
| H | 2.16183200 | -2.19991000 | -4.38603500 |
| H | 3.77068600 | -1.72367100 | -2.54977600 |
| P | 2.81847900 | -0.06214700 | 0.15144200  |
| C | 3.83142300 | 0.93516400  | -1.07606700 |
| C | 2.94030200 | 1.80139700  | -1.98971800 |
| C | 4.93940300 | 1.77233700  | -0.40564700 |
| H | 4.31471500 | 0.16879100  | -1.70082900 |
| C | 3.78730300 | 2.55623100  | -3.03069600 |
| H | 2.38778700 | 2.52266600  | -1.37660200 |

|    |             |             |             |
|----|-------------|-------------|-------------|
| H  | 2.18944100  | 1.17067200  | -2.48344100 |
| C  | 5.78034600  | 2.51380500  | -1.46298200 |
| H  | 4.47363400  | 2.51000700  | 0.26435400  |
| H  | 5.58313000  | 1.12621600  | 0.20732500  |
| C  | 4.88992800  | 3.39540300  | -2.35772500 |
| H  | 3.13589200  | 3.19680400  | -3.64470500 |
| H  | 4.25622000  | 1.82669500  | -3.71186600 |
| H  | 6.54877000  | 3.12375900  | -0.96555200 |
| H  | 6.30611300  | 1.77417400  | -2.08904400 |
| H  | 5.49840700  | 3.90786400  | -3.11736400 |
| H  | 4.41945600  | 4.17305000  | -1.73414300 |
| C  | 2.71641400  | 0.92465200  | 1.72545500  |
| C  | 1.79779100  | 2.14878600  | 1.50379500  |
| C  | 2.16705400  | 0.03053400  | 2.85773900  |
| H  | 3.72245700  | 1.28374400  | 1.98917400  |
| C  | 1.61907700  | 2.93673200  | 2.81632100  |
| H  | 0.81680900  | 1.80000800  | 1.15370700  |
| H  | 2.21328200  | 2.80577400  | 0.72841600  |
| C  | 1.99697500  | 0.82646700  | 4.16328100  |
| H  | 1.18696400  | -0.34482100 | 2.55082100  |
| H  | 2.82075600  | -0.83473700 | 3.02162500  |
| C  | 1.07742800  | 2.03909100  | 3.94154600  |
| H  | 0.93851400  | 3.77917000  | 2.63789000  |
| H  | 2.59150800  | 3.36289600  | 3.12002100  |
| H  | 1.57558700  | 0.16358000  | 4.93042500  |
| H  | 2.98414200  | 1.17016400  | 4.51988600  |
| H  | 0.96929700  | 2.61765800  | 4.87182200  |
| H  | 0.08211400  | 1.67064900  | 3.65945800  |
| Au | 0.70909900  | -0.57884800 | -0.68952700 |
| C  | -7.33277700 | 0.45333000  | -0.05617400 |

|   |             |             |             |
|---|-------------|-------------|-------------|
| C | -6.07722300 | 0.86328700  | -0.49890500 |
| C | -5.59303800 | 0.41972100  | -1.75846300 |
| C | -6.39828800 | -0.43941300 | -2.55484100 |
| C | -7.65352700 | -0.83726200 | -2.09842800 |
| C | -8.12273200 | -0.39366400 | -0.85070700 |
| H | -7.69349900 | 0.78297800  | 0.91648600  |
| H | -5.44734000 | 1.49735100  | 0.11623700  |
| H | -6.01862300 | -0.78263300 | -3.51517900 |
| H | -8.26744400 | -1.49784200 | -2.70844700 |
| H | -9.10079700 | -0.71430300 | -0.49500200 |
| C | -4.30555900 | 0.78328700  | -2.18956400 |
| C | -3.15191600 | 1.03981000  | -2.52457000 |
| C | -1.83502700 | 1.24706400  | -2.91356400 |
| O | -2.36382300 | -2.02538600 | -3.40345700 |
| C | -3.25687900 | -2.70619300 | -2.49109200 |
| H | -2.69777500 | -3.43297600 | -1.88558900 |
| H | -3.76232500 | -1.99259000 | -1.82996600 |
| H | -3.98604700 | -3.21831800 | -3.12699700 |
| C | -1.07231900 | 2.18677100  | -2.23462900 |
| C | -0.48180500 | 3.11641500  | -1.69268600 |
| C | 0.11441100  | 4.18870700  | -1.00566000 |
| C | 1.24048700  | 4.86724400  | -1.54157700 |
| C | -0.42658100 | 4.60385200  | 0.24045300  |
| C | 1.80604300  | 5.93453700  | -0.84636700 |
| H | 1.65208200  | 4.54348500  | -2.49430600 |
| C | 0.15024200  | 5.67508300  | 0.92095400  |
| H | -1.26751500 | 4.05519100  | 0.65618400  |
| C | 1.26365800  | 6.34095600  | 0.38412600  |
| H | 2.66824300  | 6.45381000  | -1.26138200 |
| H | -0.26143800 | 5.98858100  | 1.87852100  |

|   |             |             |             |
|---|-------------|-------------|-------------|
| H | 1.70982300  | 7.17487600  | 0.92380900  |
| C | -1.33382400 | 0.66975200  | -4.24978800 |
| H | -0.71026500 | 1.41735400  | -4.75780300 |
| H | -2.20690800 | 0.45409800  | -4.87652100 |
| C | -0.54558900 | -0.62837900 | -3.96824900 |
| H | -0.45071500 | -1.23231700 | -4.88088400 |
| H | 0.45153300  | -0.38897700 | -3.58827600 |
| C | -1.31085300 | -1.34394700 | -2.87349700 |
| C | -1.07636500 | -1.12566700 | -1.54142200 |
| H | -1.89146600 | -1.40554900 | -0.87128100 |
| N | -1.19031500 | -0.33354900 | 2.36377900  |
| S | -1.43353300 | -1.72968300 | 3.18233200  |
| S | -2.31564800 | 0.45430400  | 1.50214900  |
| O | -2.82173000 | -2.19772300 | 3.31971400  |
| O | -0.54653800 | -1.71240100 | 4.35528800  |
| O | -1.62448400 | 1.51164100  | 0.74532700  |
| O | -3.35055000 | -0.35294800 | 0.83029100  |
| C | -0.60557700 | -3.02319000 | 2.02477300  |
| C | -3.27530500 | 1.46841400  | 2.82478800  |
| F | -1.22519400 | -3.07434700 | 0.83086600  |
| F | 0.69609400  | -2.74106100 | 1.82967400  |
| F | -0.68928200 | -4.24366100 | 2.59638700  |
| F | -2.43782200 | 2.30210600  | 3.47479100  |
| F | -4.21777100 | 2.22331100  | 2.20477600  |
| F | -3.88304500 | 0.67948200  | 3.72233800  |

**TS2**

0 1

|   |             |             |             |
|---|-------------|-------------|-------------|
| C | -3.75528300 | -2.78912300 | -0.00701300 |
| C | -3.91109800 | -1.50559100 | -0.59215500 |

|   |             |             |             |
|---|-------------|-------------|-------------|
| C | -4.90125800 | -1.32517000 | -1.57923000 |
| C | -5.70716000 | -2.38355100 | -2.00804000 |
| C | -5.52451300 | -3.65802300 | -1.45954200 |
| C | -4.55809300 | -3.85085800 | -0.46908700 |
| C | -2.79893300 | -3.07592500 | 1.09774900  |
| C | -1.73713800 | -3.97786300 | 0.90744500  |
| C | -0.83530900 | -4.23617000 | 1.94393200  |
| C | -0.99511200 | -3.61719300 | 3.19019100  |
| C | -2.06499000 | -2.73716500 | 3.39582100  |
| C | -2.95705700 | -2.46345500 | 2.35457800  |
| H | -5.02834400 | -0.34943600 | -2.03980700 |
| H | -6.46061300 | -2.21416800 | -2.77589000 |
| H | -6.13429700 | -4.49576500 | -1.79515500 |
| H | -4.42394600 | -4.83475100 | -0.02179600 |
| H | -1.59809400 | -4.43807400 | -0.06790700 |
| H | 0.00024800  | -4.91363400 | 1.77454600  |
| H | -0.28663900 | -3.81638800 | 3.99214200  |
| H | -2.19836100 | -2.25543700 | 4.36302600  |
| H | -3.78438600 | -1.77350300 | 2.50808900  |
| P | -2.81780400 | -0.07363500 | -0.16614400 |
| C | -3.85177300 | 0.90337200  | 1.06035100  |
| C | -2.97682000 | 1.76852400  | 1.99053000  |
| C | -4.95858000 | 1.73803200  | 0.38475100  |
| H | -4.33555700 | 0.12752800  | 1.67291800  |
| C | -3.84015600 | 2.50989800  | 3.02780900  |
| H | -2.42247600 | 2.49822500  | 1.38908600  |
| H | -2.22687500 | 1.13956300  | 2.48795600  |
| C | -5.81556900 | 2.46679000  | 1.43816100  |
| H | -4.49077600 | 2.48342900  | -0.27516800 |
| H | -5.59150400 | 1.09200200  | -0.23945000 |



|    |             |             |             |
|----|-------------|-------------|-------------|
| C  | -4.94070700 | 3.34709700  | 2.34916200  |
| H  | -3.19970500 | 3.14989500  | 3.65380800  |
| H  | -4.31183700 | 1.77229300  | 3.69831100  |
| H  | -6.58194500 | 3.07569800  | 0.93633700  |
| H  | -6.34403500 | 1.71956100  | 2.05284900  |
| H  | -5.56091300 | 3.84949400  | 3.10602200  |
| H  | -4.46852100 | 4.13289200  | 1.73724900  |
| C  | -2.70689600 | 0.92809600  | -1.73012700 |
| C  | -1.79897800 | 2.15617800  | -1.48716100 |
| C  | -2.14136800 | 0.04722300  | -2.86506000 |
| H  | -3.71275500 | 1.28249400  | -2.00030000 |
| C  | -1.60580100 | 2.95596200  | -2.79041200 |
| H  | -0.82041200 | 1.81116700  | -1.12686900 |
| H  | -2.22943700 | 2.80381400  | -0.71214200 |
| C  | -1.95613200 | 0.85685100  | -4.16015200 |
| H  | -1.16454500 | -0.33031100 | -2.55057600 |
| H  | -2.79131500 | -0.81733400 | -3.04615300 |
| C  | -1.04307300 | 2.06932700  | -3.91392300 |
| H  | -0.93222800 | 3.80024400  | -2.59507500 |
| H  | -2.57576000 | 3.37981100  | -3.10499000 |
| H  | -1.52269100 | 0.20239400  | -4.92777000 |
| H  | -2.93933300 | 1.20154800  | -4.52653600 |
| H  | -0.92079000 | 2.65564200  | -4.83753800 |
| H  | -0.05212700 | 1.70020500  | -3.61773800 |
| Au | -0.71094000 | -0.57433100 | 0.69047800  |
| C  | 7.33023300  | 0.48567200  | 0.11251900  |
| C  | 6.06645200  | 0.88248700  | 0.54410800  |
| C  | 5.56791200  | 0.41900600  | 1.79037800  |
| C  | 6.36693900  | -0.44692800 | 2.58504200  |
| C  | 7.63075400  | -0.83143800 | 2.14018200  |

|   |             |             |             |
|---|-------------|-------------|-------------|
| C | 8.11447700  | -0.36790100 | 0.90552800  |
| H | 7.70192100  | 0.83116100  | -0.85049800 |
| H | 5.44147000  | 1.52202600  | -0.07044600 |
| H | 5.97610800  | -0.80631200 | 3.53502600  |
| H | 8.23997800  | -1.49718500 | 2.74936400  |
| H | 9.09919300  | -0.67787600 | 0.55882700  |
| C | 4.27229100  | 0.77028900  | 2.20967700  |
| C | 3.11371900  | 1.01626800  | 2.53329300  |
| C | 1.78782200  | 1.20572100  | 2.90675400  |
| O | 2.32792500  | -2.07731000 | 3.39806800  |
| C | 3.22110600  | -2.74472500 | 2.47359100  |
| H | 2.65407700  | -3.43429700 | 1.83354300  |
| H | 3.75274500  | -2.01814000 | 1.84831800  |
| H | 3.92798500  | -3.29626300 | 3.10146100  |
| C | 1.03025500  | 2.15776900  | 2.23590300  |
| C | 0.44298700  | 3.09648500  | 1.70741400  |
| C | -0.15475000 | 4.17984400  | 1.03777200  |
| C | -1.28637400 | 4.84198700  | 1.58179200  |
| C | 0.38861700  | 4.62245300  | -0.19739200 |
| C | -1.85571100 | 5.91918900  | 0.90497300  |
| H | -1.70016300 | 4.49784400  | 2.52638100  |
| C | -0.19105600 | 5.70414500  | -0.85916200 |
| H | 1.23431300  | 4.08679900  | -0.62053500 |
| C | -1.31065400 | 6.35312400  | -0.31474100 |
| H | -2.72282600 | 6.42490300  | 1.32657600  |
| H | 0.22307400  | 6.03856700  | -1.80861000 |
| H | -1.75925100 | 7.19503100  | -0.83985500 |
| C | 1.28584300  | 0.63517400  | 4.24850100  |
| H | 0.65224100  | 1.38115800  | 4.74618700  |
| H | 2.15918900  | 0.43778300  | 4.88119500  |

|     |             |             |             |
|-----|-------------|-------------|-------------|
| C   | 0.51493800  | -0.67538200 | 3.97895000  |
| H   | 0.43589900  | -1.28103000 | 4.89156400  |
| H   | -0.48784600 | -0.45323400 | 3.60319800  |
| C   | 1.28895300  | -1.37279400 | 2.87931600  |
| C   | 1.07676900  | -1.09995800 | 1.55177100  |
| H   | 1.90793400  | -1.33878800 | 0.88533900  |
| N   | 1.21565600  | -0.29880200 | -2.39017000 |
| S   | 1.46486600  | -1.69777900 | -3.20135600 |
| S   | 2.32929000  | 0.48105000  | -1.50573300 |
| O   | 2.85533100  | -2.15755300 | -3.34233800 |
| O   | 0.57305500  | -1.69072600 | -4.37060200 |
| O   | 1.62693900  | 1.53112100  | -0.74934600 |
| O   | 3.35367400  | -0.33326800 | -0.82617200 |
| C   | 0.64948000  | -2.98990600 | -2.03317200 |
| C   | 3.30713200  | 1.50440000  | -2.80745900 |
| F   | 1.27065700  | -3.02568600 | -0.83931300 |
| F   | -0.65411700 | -2.71552100 | -1.83871100 |
| F   | 0.74130900  | -4.21478800 | -2.59386600 |
| F   | 2.47782600  | 2.34005300  | -3.46495300 |
| F   | 4.23958200  | 2.25681100  | -2.16996900 |
| F   | 3.92871400  | 0.72058900  | -3.69997500 |
|     |             |             |             |
| C   |             |             |             |
| 0 1 |             |             |             |
| C   | 4.13487000  | -2.25124500 | -1.50326000 |
| C   | 4.22101900  | -1.49551100 | -0.30678700 |
| C   | 5.17181200  | -1.86004800 | 0.66878100  |
| C   | 6.00770500  | -2.96517400 | 0.48707900  |
| C   | 5.89206700  | -3.73854600 | -0.67394300 |
| C   | 4.96495700  | -3.37910800 | -1.65520300 |

|   |            |             |             |
|---|------------|-------------|-------------|
| C | 3.22818900 | -1.89813800 | -2.62819400 |
| C | 2.24253100 | -2.80510400 | -3.05878300 |
| C | 1.42088500 | -2.49254600 | -4.14596900 |
| C | 1.56704400 | -1.26976800 | -4.81320100 |
| C | 2.53870700 | -0.35664200 | -4.38633400 |
| C | 3.36850900 | -0.67271200 | -3.30498900 |
| H | 5.24762700 | -1.29298300 | 1.59290100  |
| H | 6.73149400 | -3.22740300 | 1.25706100  |
| H | 6.52478200 | -4.61291700 | -0.81882300 |
| H | 4.88579500 | -3.96153100 | -2.57169400 |
| H | 2.11566900 | -3.74614600 | -2.52661000 |
| H | 0.65811800 | -3.19881900 | -4.46715200 |
| H | 0.92220100 | -1.03062600 | -5.65680600 |
| H | 2.66294100 | 0.59517200  | -4.90159500 |
| H | 4.14329800 | 0.02360500  | -2.99400100 |
| P | 3.07394300 | -0.10463800 | 0.05958400  |
| C | 4.03220600 | 1.44392500  | -0.39691200 |
| C | 3.09873100 | 2.60658300  | -0.79000400 |
| C | 5.03886700 | 1.85990900  | 0.69674300  |
| H | 4.60683400 | 1.14838700  | -1.28641700 |
| C | 3.90572200 | 3.85009100  | -1.20432600 |
| H | 2.44287800 | 2.85219300  | 0.05349200  |
| H | 2.44372300 | 2.28895400  | -1.61214900 |
| C | 5.84512100 | 3.09278200  | 0.24257600  |
| H | 4.49238900 | 2.11022600  | 1.61726900  |
| H | 5.71407500 | 1.02381700  | 0.92560900  |
| C | 4.91089500 | 4.26322600  | -0.11350000 |
| H | 3.21462400 | 4.67659200  | -1.42670100 |
| H | 4.45503000 | 3.62936600  | -2.13480300 |
| H | 6.54422200 | 3.38785800  | 1.03852100  |

|    |             |             |             |
|----|-------------|-------------|-------------|
| H  | 6.44903500  | 2.82538700  | -0.64012400 |
| H  | 5.49756300  | 5.13217200  | -0.44524600 |
| H  | 4.35806900  | 4.56553600  | 0.79005600  |
| C  | 2.86329500  | -0.10685600 | 1.90409900  |
| C  | 1.92112600  | 1.03910100  | 2.33711900  |
| C  | 2.31070100  | -1.46853500 | 2.37449300  |
| H  | 3.85206100  | 0.06793000  | 2.35283100  |
| C  | 1.75267900  | 1.03143000  | 3.86823200  |
| H  | 0.94212900  | 0.89101000  | 1.86079200  |
| H  | 2.30580600  | 2.01075200  | 2.00599900  |
| C  | 2.11698700  | -1.47468200 | 3.90303400  |
| H  | 1.34997200  | -1.63155600 | 1.87594500  |
| H  | 2.97645700  | -2.28703800 | 2.07442100  |
| C  | 1.20600800  | -0.32041300 | 4.35772100  |
| H  | 1.08247600  | 1.84957600  | 4.15995300  |
| H  | 2.73167500  | 1.22724600  | 4.33880600  |
| H  | 1.69581700  | -2.44015800 | 4.21055900  |
| H  | 3.10188700  | -1.37683200 | 4.39169000  |
| H  | 1.11052600  | -0.32051900 | 5.45375700  |
| H  | 0.20312000  | -0.47173300 | 3.93557900  |
| Au | 0.97949000  | -0.11387400 | -0.92675600 |
| C  | -7.39936400 | 2.96271900  | -0.23850400 |
| C  | -6.01088200 | 2.98647000  | -0.38727600 |
| C  | -5.40149700 | 2.32415100  | -1.47839200 |
| C  | -6.21517800 | 1.63981900  | -2.41059600 |
| C  | -7.60283800 | 1.62310900  | -2.25250100 |
| C  | -8.19936300 | 2.28248400  | -1.16798200 |
| H  | -7.85821200 | 3.46753300  | 0.61045800  |
| H  | -5.38349200 | 3.49655900  | 0.34072800  |
| H  | -5.74667500 | 1.11374500  | -3.23995200 |

|   |             |             |             |
|---|-------------|-------------|-------------|
| H | -8.22021200 | 1.08572600  | -2.97104800 |
| H | -9.28105500 | 2.25993500  | -1.04376100 |
| C | -3.98181000 | 2.28642000  | -1.58707900 |
| C | -2.76831800 | 2.20406200  | -1.61608200 |
| C | -1.32176600 | 1.93804500  | -1.54937000 |
| O | -1.29632100 | -1.24069800 | -3.33298000 |
| C | -1.47239400 | -2.33897800 | -2.38387000 |
| H | -0.55619500 | -2.44067200 | -1.79324300 |
| H | -2.32642500 | -2.14040000 | -1.73146500 |
| H | -1.65067900 | -3.22762800 | -2.99350000 |
| C | -0.74490800 | 2.66932400  | -0.41809100 |
| C | -0.27895600 | 3.31683200  | 0.49945900  |
| C | 0.27182400  | 4.04637100  | 1.59133400  |
| C | 1.35691100  | 4.93271700  | 1.39372900  |
| C | -0.25193800 | 3.88111300  | 2.89448800  |
| C | 1.90819400  | 5.62367200  | 2.47614900  |
| H | 1.75905700  | 5.06578300  | 0.39195100  |
| C | 0.30250500  | 4.58228100  | 3.96851700  |
| H | -1.08295400 | 3.19594700  | 3.04817300  |
| C | 1.38528200  | 5.45021300  | 3.76619300  |
| H | 2.74434100  | 6.30218300  | 2.31237200  |
| H | -0.10763800 | 4.44483800  | 4.96794100  |
| H | 1.81643200  | 5.99077800  | 4.60756400  |
| C | -0.59461000 | 2.28443600  | -2.90146400 |
| H | 0.48083900  | 2.33185100  | -2.69242300 |
| H | -0.93309400 | 3.24264500  | -3.30613000 |
| C | -0.90151200 | 1.08087900  | -3.80752200 |
| H | -1.84610600 | 1.21862900  | -4.35609700 |
| H | -0.11530500 | 0.85232000  | -4.53458500 |
| C | -1.10632400 | -0.04552300 | -2.83514300 |

|   |             |             |             |
|---|-------------|-------------|-------------|
| C | -1.13640900 | 0.37996500  | -1.49468600 |
| H | -1.69875300 | -0.16686200 | -0.73972300 |
| N | -2.71290700 | -2.84444100 | 0.63440800  |
| S | -1.28608200 | -2.47531600 | 1.32661600  |
| S | -4.15420800 | -2.37519600 | 1.26444500  |
| O | -1.10050000 | -1.06715300 | 1.73430800  |
| O | -0.24571400 | -3.09634600 | 0.48361500  |
| O | -5.18178300 | -3.24712000 | 0.68145200  |
| O | -4.15427800 | -2.08427300 | 2.70851000  |
| C | -1.20377900 | -3.49221700 | 2.99353400  |
| C | -4.47676800 | -0.67553300 | 0.41771600  |
| F | -1.42639800 | -2.70071800 | 4.05133300  |
| F | -2.10039100 | -4.49044800 | 2.98787600  |
| F | 0.03076100  | -4.02816700 | 3.11292900  |
| F | -4.30519000 | -0.79162400 | -0.92029200 |
| F | -5.73937700 | -0.28278400 | 0.65436400  |
| F | -3.63514300 | 0.26264200  | 0.88115800  |

**TS3**

0 1

|   |            |             |             |
|---|------------|-------------|-------------|
| C | 3.96418300 | -3.39375600 | -0.49704400 |
| C | 4.63149700 | -2.36066100 | 0.21562200  |
| C | 5.78859400 | -2.67291400 | 0.95644100  |
| C | 6.27502100 | -3.98236800 | 1.02245600  |
| C | 5.59581300 | -5.00787200 | 0.35367700  |
| C | 4.45415500 | -4.71024000 | -0.39633400 |
| C | 2.77344700 | -3.14018000 | -1.35537700 |
| C | 1.53892000 | -3.74994400 | -1.06291500 |
| C | 0.41169400 | -3.48326200 | -1.84694100 |
| C | 0.49874300 | -2.59902500 | -2.92888300 |

|   |             |             |             |
|---|-------------|-------------|-------------|
| C | 1.72381600  | -1.99475000 | -3.23520400 |
| C | 2.85486200  | -2.27249800 | -2.45992700 |
| H | 6.30874600  | -1.89025200 | 1.50366200  |
| H | 7.17202800  | -4.19913100 | 1.60080500  |
| H | 5.95775600  | -6.03367100 | 0.40719200  |
| H | 3.93479300  | -5.50008700 | -0.93696400 |
| H | 1.46016400  | -4.40998400 | -0.20042200 |
| H | -0.54191000 | -3.93725200 | -1.59032600 |
| H | -0.38435200 | -2.37827200 | -3.52451200 |
| H | 1.80200100  | -1.31086300 | -4.07929500 |
| H | 3.80896000  | -1.81988300 | -2.71617300 |
| P | 3.96028600  | -0.64399900 | 0.25584900  |
| C | 4.92770600  | 0.28177000  | -1.05200800 |
| C | 4.10362300  | 1.43966100  | -1.65264900 |
| C | 6.32552200  | 0.74349500  | -0.58778800 |
| H | 5.08201600  | -0.46819800 | -1.84009100 |
| C | 4.87437700  | 2.10183700  | -2.80867200 |
| H | 3.89500300  | 2.18914800  | -0.87920600 |
| H | 3.13094100  | 1.06196700  | -1.99529500 |
| C | 7.07979000  | 1.41854700  | -1.75145000 |
| H | 6.22425300  | 1.46350100  | 0.23661600  |
| H | 6.90217400  | -0.11342100 | -0.21130600 |
| C | 6.26404900  | 2.58040200  | -2.35015100 |
| H | 4.29011500  | 2.94460000  | -3.20113700 |
| H | 4.99382300  | 1.37089300  | -3.62631600 |
| H | 8.05843800  | 1.77595300  | -1.39838800 |
| H | 7.27101600  | 0.66870000  | -2.53662800 |
| H | 6.81012000  | 3.03087400  | -3.19208400 |
| H | 6.13604600  | 3.36611600  | -1.58796300 |
| C | 4.46018300  | 0.05983900  | 1.90884800  |



|    |             |             |             |
|----|-------------|-------------|-------------|
| C  | 3.99889200  | 1.53354400  | 2.00136800  |
| C  | 3.82981600  | -0.77285800 | 3.04803900  |
| H  | 5.55541500  | 0.03039000  | 1.99319400  |
| C  | 4.34365000  | 2.13168300  | 3.37782700  |
| H  | 2.90948800  | 1.57348400  | 1.85191000  |
| H  | 4.44942100  | 2.13568600  | 1.20460500  |
| C  | 4.16595000  | -0.16965600 | 4.42555300  |
| H  | 2.73714100  | -0.77473300 | 2.90704500  |
| H  | 4.16725200  | -1.81629900 | 2.99480800  |
| C  | 3.72215800  | 1.30152600  | 4.51504900  |
| H  | 3.98938500  | 3.17177900  | 3.42502800  |
| H  | 5.43925700  | 2.15593500  | 3.50094000  |
| H  | 3.68448100  | -0.76510100 | 5.21489200  |
| H  | 5.25468300  | -0.23066100 | 4.59066900  |
| H  | 3.99638000  | 1.72453200  | 5.49231600  |
| H  | 2.62393600  | 1.35051600  | 4.43404000  |
| Au | 1.64738900  | -0.42621700 | 0.16783700  |
| C  | -6.14434700 | 4.47581300  | 1.24643000  |
| C  | -4.95673400 | 3.96906800  | 0.71381900  |
| C  | -4.34613900 | 2.82875000  | 1.28699300  |
| C  | -4.95373200 | 2.21741300  | 2.40806100  |
| C  | -6.14449000 | 2.72939900  | 2.93014300  |
| C  | -6.74445700 | 3.85762500  | 2.35340800  |
| H  | -6.60630600 | 5.35253100  | 0.79371200  |
| H  | -4.49473800 | 4.43823600  | -0.15239400 |
| H  | -4.49024800 | 1.33745100  | 2.84676900  |
| H  | -6.60892400 | 2.24059600  | 3.78556400  |
| H  | -7.67473300 | 4.25101400  | 2.76123100  |
| C  | -3.15724300 | 2.28470100  | 0.71936500  |
| C  | -2.16895900 | 1.79403200  | 0.20638400  |

|   |             |             |             |
|---|-------------|-------------|-------------|
| C | -0.96046300 | 1.21371400  | -0.40279700 |
| O | -1.31948000 | -2.35799200 | 0.44502200  |
| C | -0.78965000 | -2.54272000 | 1.77399100  |
| H | 0.29259800  | -2.35166000 | 1.78385200  |
| H | -1.30067000 | -1.88185000 | 2.48397700  |
| H | -0.99002500 | -3.58869000 | 2.02553000  |
| C | 0.04735100  | 2.27121900  | -0.54649300 |
| C | 0.90813100  | 3.12798400  | -0.63077000 |
| C | 1.96738700  | 4.07699800  | -0.69976900 |
| C | 2.34358500  | 4.66048800  | -1.93196000 |
| C | 2.69229500  | 4.42046400  | 0.46684500  |
| C | 3.41658600  | 5.55368400  | -1.99236600 |
| H | 1.79015500  | 4.40011300  | -2.83209700 |
| C | 3.76427700  | 5.31358500  | 0.39635200  |
| H | 2.40704600  | 3.97326600  | 1.41614500  |
| C | 4.13346600  | 5.88170800  | -0.83229800 |
| H | 3.69693800  | 5.99315000  | -2.94880200 |
| H | 4.31363200  | 5.56695900  | 1.30243200  |
| H | 4.96937300  | 6.57786700  | -0.88448100 |
| C | -1.31665900 | 0.51148400  | -1.76936800 |
| H | -0.37985100 | 0.41301200  | -2.34684100 |
| H | -2.03375100 | 1.10270200  | -2.35075900 |
| C | -1.81705600 | -0.84406300 | -1.31609400 |
| H | -3.37562100 | -0.66282700 | -0.69649600 |
| H | -2.13580100 | -1.61357100 | -2.01444200 |
| C | -1.21762700 | -1.13729400 | -0.10799300 |
| C | -0.45061700 | -0.01291100 | 0.45632400  |
| H | -0.59926300 | 0.15395700  | 1.53010800  |
| N | -4.47456700 | -0.69540300 | -0.41443400 |
| S | -4.80780200 | -1.38031600 | 1.09528100  |

|   |             |             |             |
|---|-------------|-------------|-------------|
| S | -5.53785300 | -0.68654800 | -1.72935300 |
| O | -6.64732200 | -1.61844300 | -1.53418400 |
| O | -4.71074500 | -0.68942100 | -2.93611000 |
| C | -6.25335100 | 1.09375300  | -1.58803100 |
| O | -3.67701500 | -1.01746200 | 1.94777600  |
| O | -6.19137500 | -1.14779500 | 1.49494100  |
| C | -4.63079200 | -3.30113000 | 0.74874200  |
| F | -4.04097500 | -3.51246600 | -0.43506900 |
| F | -3.88422200 | -3.84003600 | 1.72290800  |
| F | -5.83939800 | -3.86617000 | 0.75057500  |
| F | -6.77504200 | 1.28720200  | -0.37836300 |
| F | -5.27382300 | 1.97550000  | -1.81723100 |
| F | -7.20767300 | 1.23293100  | -2.52122200 |

## IM2

0 1

|   |            |             |             |
|---|------------|-------------|-------------|
| C | 3.40209700 | -2.43906200 | -1.25147200 |
| C | 3.54554500 | -1.80847500 | 0.01302900  |
| C | 4.25901200 | -2.46625400 | 1.03294000  |
| C | 4.80802400 | -3.73650300 | 0.82731600  |
| C | 4.64361100 | -4.37065900 | -0.40985400 |
| C | 3.94838200 | -3.72232200 | -1.43571600 |
| C | 2.62661600 | -1.81501500 | -2.36120600 |
| C | 1.41409900 | -2.40081700 | -2.76937500 |
| C | 0.61630800 | -1.78019200 | -3.73450800 |
| C | 1.01661400 | -0.56850500 | -4.30922900 |
| C | 2.23570700 | 0.00705800  | -3.93204100 |
| C | 3.03920800 | -0.61717400 | -2.97064600 |
| H | 4.36925600 | -1.99477800 | 2.00684900  |
| H | 5.35145500 | -4.22931900 | 1.63239400  |

|   |             |             |             |
|---|-------------|-------------|-------------|
| H | 5.05674300  | -5.36449800 | -0.57733400 |
| H | 3.82170100  | -4.20880100 | -2.40199100 |
| H | 1.08024100  | -3.32216300 | -2.30041900 |
| H | -0.32847900 | -2.23600200 | -4.01882700 |
| H | 0.37940500  | -0.07374300 | -5.03902800 |
| H | 2.56182200  | 0.94435800  | -4.38087000 |
| H | 3.98911300  | -0.17018000 | -2.69082200 |
| P | 2.72836800  | -0.18898200 | 0.34502700  |
| C | 4.06259800  | 1.05617600  | -0.07890300 |
| C | 3.46372500  | 2.38494600  | -0.57994800 |
| C | 5.09360100  | 1.26726900  | 1.04892100  |
| H | 4.59996700  | 0.59019200  | -0.91547500 |
| C | 4.58188500  | 3.34580300  | -1.02480300 |
| H | 2.87961900  | 2.85307800  | 0.22105800  |
| H | 2.76436800  | 2.18516200  | -1.40270900 |
| C | 6.19946700  | 2.23901700  | 0.58799000  |
| H | 4.59564900  | 1.68549900  | 1.93458700  |
| H | 5.53446700  | 0.30323300  | 1.34134300  |
| C | 5.60257400  | 3.57434900  | 0.10469900  |
| H | 4.13983500  | 4.30071700  | -1.33884500 |
| H | 5.09987700  | 2.91569100  | -1.89891400 |
| H | 6.91027700  | 2.40830600  | 1.41042400  |
| H | 6.76138500  | 1.77331700  | -0.23856800 |
| H | 6.40416300  | 4.24723100  | -0.23440200 |
| H | 5.09450700  | 4.07141000  | 0.94637600  |
| C | 2.47612500  | -0.09109400 | 2.19004300  |
| C | 1.87987800  | 1.28905400  | 2.55552500  |
| C | 1.52477500  | -1.21585800 | 2.65252400  |
| H | 3.44817900  | -0.19590900 | 2.69288200  |
| C | 1.62635700  | 1.38554300  | 4.07121500  |

|    |             |             |             |
|----|-------------|-------------|-------------|
| H  | 0.92619500  | 1.41274700  | 2.02186800  |
| H  | 2.53682600  | 2.10223900  | 2.22702700  |
| C  | 1.23818800  | -1.11913300 | 4.16276400  |
| H  | 0.58329200  | -1.11651100 | 2.09191700  |
| H  | 1.94756200  | -2.19703500 | 2.41159200  |
| C  | 0.68232400  | 0.26490900  | 4.54382100  |
| H  | 1.19954600  | 2.37077800  | 4.31044300  |
| H  | 2.58747100  | 1.30805800  | 4.60734700  |
| H  | 0.52926700  | -1.90886000 | 4.45079100  |
| H  | 2.17332200  | -1.30091900 | 4.71949600  |
| H  | 0.52638800  | 0.32705300  | 5.63091800  |
| H  | -0.29889100 | 0.40068000  | 4.06311200  |
| Au | 0.62980200  | 0.20617000  | -0.59646600 |
| C  | -7.49155500 | 2.57222000  | 0.62442800  |
| C  | -6.20597600 | 2.26958400  | 0.16837800  |
| C  | -5.35987200 | 3.29410400  | -0.32178000 |
| C  | -5.84135100 | 4.62485900  | -0.33892900 |
| C  | -7.12839200 | 4.91711300  | 0.12079600  |
| C  | -7.95893700 | 3.89457900  | 0.60233000  |
| H  | -8.13055000 | 1.77363200  | 1.00013500  |
| H  | -5.84037600 | 1.24537900  | 0.18903800  |
| H  | -5.19425700 | 5.41685700  | -0.71170600 |
| H  | -7.48469700 | 5.94645900  | 0.10354100  |
| H  | -8.96152400 | 4.12693300  | 0.95907200  |
| C  | -4.04672400 | 2.98470100  | -0.78430400 |
| C  | -2.92904300 | 2.70174600  | -1.17708600 |
| C  | -1.56791400 | 2.28386500  | -1.56495300 |
| O  | -2.26702400 | -1.25427200 | -2.05468700 |
| C  | -3.03940600 | -1.90342600 | -3.07894200 |
| H  | -3.97587200 | -1.35134600 | -3.24504700 |

|   |             |             |             |
|---|-------------|-------------|-------------|
| H | -2.46964400 | -1.95475300 | -4.01743800 |
| H | -3.24432700 | -2.91432500 | -2.71637200 |
| C | -0.60848000 | 3.22157200  | -0.97373500 |
| C | 0.16299700  | 3.98914400  | -0.42815600 |
| C | 1.09610000  | 4.81244500  | 0.26427800  |
| C | 1.89479300  | 5.75737500  | -0.42112800 |
| C | 1.26694600  | 4.66118600  | 1.66186700  |
| C | 2.84357700  | 6.51487600  | 0.27137300  |
| H | 1.76788900  | 5.87900400  | -1.49521200 |
| C | 2.21861300  | 5.42204100  | 2.34497300  |
| H | 0.65480700  | 3.93506600  | 2.19130100  |
| C | 3.01375200  | 6.34846300  | 1.65340300  |
| H | 3.45673500  | 7.23432800  | -0.27001800 |
| H | 2.34148900  | 5.29053200  | 3.41951200  |
| H | 3.75757200  | 6.93828800  | 2.18727700  |
| C | -1.45585800 | 2.16510400  | -3.13473900 |
| H | -0.38697700 | 2.22777300  | -3.40602600 |
| H | -1.98808200 | 2.98535300  | -3.63396500 |
| C | -2.01750300 | 0.78539000  | -3.40243000 |
| H | -1.90324900 | -1.93891200 | -0.50853800 |
| H | -2.35219100 | 0.43906500  | -4.37482200 |
| C | -1.92999100 | 0.05986900  | -2.26920200 |
| C | -1.36641000 | 0.77767200  | -1.09797800 |
| H | -1.96313700 | 0.60293300  | -0.19571400 |
| N | -1.86551500 | -2.52586000 | 0.36467700  |
| S | -1.54841600 | -4.17474800 | 0.03125000  |
| S | -2.69147800 | -1.90284600 | 1.72499200  |
| O | -2.29921000 | -0.50713400 | 1.86592800  |
| O | -2.60797800 | -2.86644600 | 2.81340300  |
| C | -4.50572900 | -1.87430800 | 1.06994900  |

|   |             |             |             |
|---|-------------|-------------|-------------|
| O | -2.44249400 | -5.06362400 | 0.76036400  |
| O | -1.35036900 | -4.25077300 | -1.41466700 |
| C | 0.19676000  | -4.33293800 | 0.81953100  |
| F | 0.11624200  | -4.18739500 | 2.14312400  |
| F | 0.67098600  | -5.54814300 | 0.52057400  |
| F | 0.99166500  | -3.39807600 | 0.30081800  |
| F | -4.55205200 | -1.12517600 | -0.04050100 |
| F | -4.90845000 | -3.11596300 | 0.78995800  |
| F | -5.28696800 | -1.33827600 | 2.01121100  |

### IM3

0 1

|   |             |             |             |
|---|-------------|-------------|-------------|
| C | -3.09942300 | -1.89171100 | -2.24233300 |
| C | -2.78054100 | -2.64697700 | -1.08054200 |
| C | -3.77977600 | -3.44020600 | -0.48426400 |
| C | -5.08023800 | -3.47952800 | -0.99785300 |
| C | -5.40325500 | -2.71135100 | -2.12253800 |
| C | -4.41835200 | -1.92901900 | -2.73332700 |
| C | -2.10871200 | -1.01970900 | -2.93402000 |
| C | -2.31355300 | 0.37200700  | -2.97959100 |
| C | -1.34862000 | 1.21656800  | -3.53790300 |
| C | -0.16760100 | 0.68217000  | -4.06698900 |
| C | 0.03036900  | -0.70382900 | -4.06074700 |
| C | -0.93649600 | -1.54880600 | -3.50447100 |
| H | -3.54810800 | -4.01704400 | 0.40815000  |
| H | -5.83577300 | -4.09800800 | -0.51524800 |
| H | -6.41501700 | -2.72340400 | -2.52566400 |
| H | -4.65998000 | -1.33715800 | -3.61505700 |
| H | -3.21189800 | 0.79107000  | -2.53311900 |
| H | -1.50582000 | 2.29277100  | -3.52916400 |

|   |             |             |             |
|---|-------------|-------------|-------------|
| H | 0.59538100  | 1.34262700  | -4.47603100 |
| H | 0.94129000  | -1.12968700 | -4.47934500 |
| H | -0.77683200 | -2.62359900 | -3.50363000 |
| P | -1.12136600 | -2.52729500 | -0.27672800 |
| C | -0.17860100 | -3.97359000 | -1.00650000 |
| C | 1.33557500  | -3.69339400 | -1.08095500 |
| C | -0.47718900 | -5.32450000 | -0.32315500 |
| H | -0.56264800 | -4.04096800 | -2.03390600 |
| C | 2.05265600  | -4.84061100 | -1.81521000 |
| H | 1.74362900  | -3.59909700 | -0.06684000 |
| H | 1.51323100  | -2.73306500 | -1.58284500 |
| C | 0.25736500  | -6.46765400 | -1.05392300 |
| H | -0.13583300 | -5.28993000 | 0.72130200  |
| H | -1.56043900 | -5.51395500 | -0.31418300 |
| C | 1.77105400  | -6.19452900 | -1.13822800 |
| H | 3.13290500  | -4.64402700 | -1.84155300 |
| H | 1.69839400  | -4.87583000 | -2.85958100 |
| H | 0.06610100  | -7.42024700 | -0.53761400 |
| H | -0.15249100 | -6.56107800 | -2.07317700 |
| H | 2.27343400  | -7.00766800 | -1.68308000 |
| H | 2.19212200  | -6.17299000 | -0.12080300 |
| C | -1.38157500 | -2.90104700 | 1.52900300  |
| C | -0.01024200 | -2.86088000 | 2.24295700  |
| C | -2.33932500 | -1.86152100 | 2.15074600  |
| H | -1.80578700 | -3.90987200 | 1.63944900  |
| C | -0.17054200 | -3.08233800 | 3.75791800  |
| H | 0.45162500  | -1.87790500 | 2.06349900  |
| H | 0.66972700  | -3.61007000 | 1.82310000  |
| C | -2.49395300 | -2.07952400 | 3.66647600  |
| H | -1.92662600 | -0.85878600 | 1.97024200  |



|    |             |             |             |
|----|-------------|-------------|-------------|
| H  | -3.31943100 | -1.90263000 | 1.66176100  |
| C  | -1.12798600 | -2.04653900 | 4.37400800  |
| H  | 0.81570300  | -3.02903100 | 4.24197700  |
| H  | -0.56604700 | -4.09607900 | 3.93861300  |
| H  | -3.15962500 | -1.30807500 | 4.07878800  |
| H  | -2.97305600 | -3.05681800 | 3.84774200  |
| H  | -1.24827100 | -2.22850600 | 5.45217200  |
| H  | -0.69106100 | -1.04114700 | 4.25707500  |
| Au | -0.06164000 | -0.45876100 | -0.43602700 |
| C  | 9.36533900  | 3.01936100  | -0.07706200 |
| C  | 8.12801800  | 2.39330800  | 0.09683000  |
| C  | 6.95206400  | 2.97123900  | -0.43941300 |
| C  | 7.05473200  | 4.19021100  | -1.15149300 |
| C  | 8.29683100  | 4.80824000  | -1.31941100 |
| C  | 9.45573300  | 4.22786100  | -0.78318000 |
| H  | 10.26196800 | 2.56368700  | 0.34160900  |
| H  | 8.05446300  | 1.45604000  | 0.64534700  |
| H  | 6.15368500  | 4.63983100  | -1.56468700 |
| H  | 8.36076400  | 5.74699400  | -1.86849400 |
| H  | 10.42152900 | 4.71394400  | -0.91491200 |
| C  | 5.68547500  | 2.34068600  | -0.25638200 |
| C  | 4.60315900  | 1.80659900  | -0.09327700 |
| C  | 3.28422500  | 1.19008300  | 0.11267800  |
| O  | 0.10226400  | 2.42647500  | 1.50626300  |
| C  | 0.32828900  | 2.81502600  | 2.87516200  |
| H  | 0.69635200  | 1.95200700  | 3.44727000  |
| H  | 1.05621500  | 3.63718700  | 2.91848300  |
| H  | -0.64072600 | 3.13719000  | 3.26682100  |
| C  | 3.46540800  | -0.23577200 | 0.45904500  |
| C  | 3.66412300  | -1.38723000 | 0.80286800  |

|   |             |             |             |
|---|-------------|-------------|-------------|
| C | 3.88346700  | -2.73832700 | 1.19776900  |
| C | 3.33398900  | -3.23489400 | 2.40297200  |
| C | 4.63833000  | -3.61466700 | 0.38241800  |
| C | 3.52517800  | -4.56894700 | 2.77215000  |
| H | 2.74944800  | -2.56744000 | 3.03095600  |
| C | 4.82706600  | -4.94608100 | 0.76062200  |
| H | 5.06244400  | -3.23765700 | -0.54597700 |
| C | 4.26992000  | -5.43068200 | 1.95341400  |
| H | 3.09073600  | -4.93734200 | 3.70084800  |
| H | 5.40460700  | -5.61045900 | 0.11920000  |
| H | 4.41641400  | -6.47061900 | 2.24204900  |
| C | 2.34773700  | 1.37226800  | -1.15120700 |
| H | 2.51384200  | 0.57554300  | -1.88270900 |
| H | 2.60572600  | 2.34025800  | -1.60622300 |
| C | 0.91387400  | 1.42927300  | -0.56580900 |
| H | 0.27126300  | 2.09976100  | -1.15235200 |
| C | 1.18012700  | 1.96494700  | 0.79195900  |
| C | 2.46215200  | 1.88451000  | 1.20751800  |
| H | 2.87107200  | 2.09438500  | 2.18882400  |
| N | -2.37241100 | 2.89051700  | 0.55706900  |
| S | -2.47143400 | 4.18417200  | -0.54007400 |
| S | -3.58784100 | 2.29371000  | 1.59274300  |
| O | -3.84877800 | 4.33877900  | -0.98722100 |
| O | -1.33917600 | 4.03515500  | -1.44801900 |
| O | -2.87157500 | 1.59565100  | 2.65788400  |
| O | -4.62170100 | 3.28968700  | 1.84039600  |
| C | -2.03149400 | 5.68447400  | 0.58710400  |
| C | -4.36719600 | 0.93727400  | 0.47083200  |
| F | -2.94177800 | 5.81949500  | 1.55265500  |
| F | -0.82525500 | 5.47128700  | 1.13130300  |

|   |             |            |             |
|---|-------------|------------|-------------|
| F | -2.00014600 | 6.78390200 | -0.17101400 |
| F | -3.40140800 | 0.16775100 | -0.02181700 |
| F | -5.19632100 | 0.20521700 | 1.22610300  |
| F | -5.04697100 | 1.50887600 | -0.52649400 |
| H | -1.39011200 | 2.61053200 | 0.83670800  |

#### TS4

0 1

|   |            |             |             |
|---|------------|-------------|-------------|
| C | 4.98754900 | -2.76490200 | -1.12007600 |
| C | 5.23085400 | -1.77178300 | -0.13387600 |
| C | 6.36387200 | -1.89704100 | 0.69529900  |
| C | 7.23377000 | -2.98540500 | 0.57913700  |
| C | 6.97505400 | -3.98063600 | -0.37061200 |
| C | 5.86144100 | -3.86587900 | -1.20747800 |
| C | 3.83536300 | -2.69501900 | -2.06149200 |
| C | 2.81201400 | -3.65810900 | -1.99483500 |
| C | 1.68584500 | -3.55378600 | -2.81847500 |
| C | 1.56972200 | -2.48887100 | -3.72057400 |
| C | 2.59436400 | -1.53833900 | -3.81069100 |
| C | 3.72295300 | -1.64333100 | -2.98941100 |
| H | 6.56505000 | -1.14491600 | 1.45406300  |
| H | 8.10154500 | -3.05720400 | 1.23324300  |
| H | 7.63936900 | -4.83866000 | -0.46375600 |
| H | 5.66249500 | -4.62848700 | -1.95907000 |
| H | 2.88493300 | -4.46253100 | -1.26474300 |
| H | 0.88817400 | -4.29083700 | -2.73812600 |
| H | 0.68179100 | -2.39617900 | -4.34413000 |
| H | 2.51205800 | -0.70998800 | -4.51305900 |
| H | 4.51491200 | -0.89988200 | -3.05172100 |
| P | 4.07826900 | -0.35110300 | 0.13360800  |

|   |            |             |             |
|---|------------|-------------|-------------|
| C | 4.89736000 | 1.05950100  | -0.78156500 |
| C | 3.86384300 | 2.10050500  | -1.25745500 |
| C | 6.05417200 | 1.71583700  | -0.00107200 |
| H | 5.32527500 | 0.57396300  | -1.67190800 |
| C | 4.55173400 | 3.18300200  | -2.10907300 |
| H | 3.38494800 | 2.56734700  | -0.38781000 |
| H | 3.06734100 | 1.60010200  | -1.82526000 |
| C | 6.72818200 | 2.80904700  | -0.85516300 |
| H | 5.65814300 | 2.17316300  | 0.91795300  |
| H | 6.79072300 | 0.95537300  | 0.29460000  |
| C | 5.70203200 | 3.85267000  | -1.33625000 |
| H | 3.81199500 | 3.93307800  | -2.41901900 |
| H | 4.95391200 | 2.71761700  | -3.02502700 |
| H | 7.52642900 | 3.29360900  | -0.27353400 |
| H | 7.20349100 | 2.33673000  | -1.73062200 |
| H | 6.19660300 | 4.60756400  | -1.96536500 |
| H | 5.28291900 | 4.37834100  | -0.46377800 |
| C | 4.17203500 | 0.00629700  | 1.95878700  |
| C | 3.28993800 | 1.23024600  | 2.28904800  |
| C | 3.68505800 | -1.23198200 | 2.74568800  |
| H | 5.21113600 | 0.23580300  | 2.23449600  |
| C | 3.29198000 | 1.51052300  | 3.80310400  |
| H | 2.26265300 | 1.01992800  | 1.95531000  |
| H | 3.62847700 | 2.11494400  | 1.73837800  |
| C | 3.67296300 | -0.95393400 | 4.26062600  |
| H | 2.66403000 | -1.47261900 | 2.40895900  |
| H | 4.31410300 | -2.10334300 | 2.52176300  |
| C | 2.81566900 | 0.28032700  | 4.59596800  |
| H | 2.65064000 | 2.37705500  | 4.01821900  |
| H | 4.31378500 | 1.77634600  | 4.12244500  |

|    |             |             |             |
|----|-------------|-------------|-------------|
| H  | 3.29698300  | -1.83945000 | 4.79376900  |
| H  | 4.70609200  | -0.78164200 | 4.60586100  |
| H  | 2.84484600  | 0.48485400  | 5.67627100  |
| H  | 1.76648700  | 0.07031100  | 4.33069300  |
| Au | 1.84408500  | -0.72021900 | -0.37041700 |
| C  | -7.20940200 | 3.51179000  | -1.15877500 |
| C  | -5.95056700 | 3.06419400  | -0.74956000 |
| C  | -5.03834200 | 2.54066100  | -1.69570100 |
| C  | -5.42134800 | 2.48124800  | -3.05654700 |
| C  | -6.68172400 | 2.93392900  | -3.45516900 |
| C  | -7.58065300 | 3.44898500  | -2.50962600 |
| H  | -7.90575400 | 3.90490300  | -0.41907300 |
| H  | -5.66298300 | 3.09563200  | 0.29825000  |
| H  | -4.72496900 | 2.07171300  | -3.78571000 |
| H  | -6.96552100 | 2.88056300  | -4.50572900 |
| H  | -8.56457500 | 3.79564100  | -2.82305400 |
| C  | -3.77045000 | 2.04060700  | -1.27771900 |
| C  | -2.71365200 | 1.56427500  | -0.90938200 |
| C  | -1.47641000 | 0.90213800  | -0.47225700 |
| O  | -0.65295200 | -2.12509400 | 1.44927800  |
| C  | -1.28595300 | -2.00821700 | 2.73926700  |
| H  | -0.97833900 | -1.07891900 | 3.23985900  |
| H  | -2.37533000 | -2.03308200 | 2.62491500  |
| H  | -0.95122200 | -2.87562400 | 3.31688400  |
| C  | -0.45644300 | 1.93189300  | -0.18750700 |
| C  | 0.30865900  | 2.84338300  | 0.07233300  |
| C  | 1.21199200  | 3.90515000  | 0.36381600  |
| C  | 1.66086100  | 4.76981900  | -0.66261300 |
| C  | 1.68875800  | 4.10641500  | 1.68005000  |
| C  | 2.56689300  | 5.79425000  | -0.37835800 |

|   |             |             |             |
|---|-------------|-------------|-------------|
| H | 1.29452800  | 4.62080500  | -1.67608300 |
| C | 2.59753200  | 5.13155700  | 1.95497800  |
| H | 1.34613800  | 3.44573200  | 2.47252200  |
| C | 3.04251500  | 5.97770200  | 0.92852500  |
| H | 2.90740200  | 6.44908500  | -1.17924700 |
| H | 2.95860200  | 5.27169200  | 2.97324300  |
| H | 3.75102300  | 6.77588800  | 1.14551900  |
| C | -0.97645000 | -0.13601200 | -1.55397000 |
| H | -0.38217000 | 0.35709900  | -2.32950800 |
| H | -1.86632600 | -0.58416400 | -2.01571600 |
| C | -0.21575800 | -1.19447900 | -0.73055600 |
| H | -0.23239300 | -2.19675600 | -1.17755800 |
| C | -0.87630500 | -1.13210900 | 0.57676500  |
| C | -1.68059100 | -0.01414400 | 0.75596400  |
| H | -1.90887800 | 0.42734200  | 1.72416400  |
| N | -4.33847100 | -0.96064900 | 0.67373900  |
| S | -4.72915300 | -2.30543400 | -0.27472600 |
| S | -5.37534300 | -0.09832300 | 1.69603800  |
| O | -5.85670600 | -3.04662600 | 0.28089000  |
| O | -3.45107800 | -2.93349700 | -0.60596100 |
| O | -4.75076300 | 1.20316000  | 1.91562200  |
| O | -6.76917900 | -0.26050600 | 1.29970800  |
| C | -5.35892600 | -1.48907000 | -1.90612300 |
| C | -5.16667700 | -1.04798700 | 3.36795600  |
| F | -6.30905300 | -0.59409100 | -1.64302800 |
| F | -4.33521700 | -0.89719600 | -2.53307700 |
| F | -5.85315200 | -2.46350600 | -2.68395000 |
| F | -4.01036000 | -0.67772400 | 3.94414600  |
| F | -6.18559000 | -0.72112700 | 4.16996400  |
| F | -5.15641900 | -2.36982600 | 3.16658700  |

|          |             |             |             |
|----------|-------------|-------------|-------------|
| H        | -3.26447100 | -0.62715200 | 0.63477300  |
| <b>E</b> |             |             |             |
| 0 1      |             |             |             |
| C        | -5.93842100 | -0.67198200 | -0.97579700 |
| C        | -4.70022100 | -0.03906100 | -0.83737100 |
| C        | -3.71659600 | -0.57505300 | 0.02735500  |
| C        | -4.00893100 | -1.75869700 | 0.74627500  |
| C        | -5.25019100 | -2.38361300 | 0.60029300  |
| C        | -6.21841500 | -1.84487500 | -0.25962600 |
| H        | -6.68671400 | -0.24922200 | -1.64505200 |
| H        | -4.48017300 | 0.87105300  | -1.39263600 |
| H        | -3.25470400 | -2.17517700 | 1.41139600  |
| H        | -5.46248700 | -3.29449000 | 1.15876900  |
| H        | -7.18419000 | -2.33591500 | -0.37104000 |
| C        | -2.44739100 | 0.06091700  | 0.17121800  |
| C        | -1.35823600 | 0.58961500  | 0.29840000  |
| C        | -0.04289300 | 1.22011200  | 0.45919400  |
| O        | 1.74209400  | 4.39087800  | -0.33227800 |
| C        | 2.10785400  | 4.26497000  | -1.71976600 |
| H        | 2.75958900  | 3.39227900  | -1.88088300 |
| H        | 1.21949100  | 4.18820200  | -2.36541900 |
| H        | 2.65610200  | 5.18068700  | -1.96667200 |
| C        | 1.01108800  | 0.20378400  | 0.29395300  |
| C        | 1.88306700  | -0.63358000 | 0.15422300  |
| C        | 2.90756500  | -1.61328200 | -0.00918100 |
| C        | 3.92955200  | -1.75483700 | 0.95958400  |
| C        | 2.91534400  | -2.46309000 | -1.14082300 |
| C        | 4.92812900  | -2.71861800 | 0.79531300  |
| H        | 3.92802000  | -1.10298400 | 1.83131100  |

|   |             |             |             |
|---|-------------|-------------|-------------|
| C | 3.91837200  | -3.42377000 | -1.29524000 |
| H | 2.12943100  | -2.35964900 | -1.88679200 |
| C | 4.92684300  | -3.55646100 | -0.32954800 |
| H | 5.70936000  | -2.81725600 | 1.54804200  |
| H | 3.91160500  | -4.07231000 | -2.17044400 |
| H | 5.70620000  | -4.30721800 | -0.45271900 |
| C | 0.13199400  | 1.93751700  | 1.86587700  |
| H | 0.51748700  | 1.23184600  | 2.61352600  |
| H | -0.85383900 | 2.28790500  | 2.21515300  |
| C | 1.06146300  | 3.08057800  | 1.54534000  |
| H | 1.58556300  | 3.66704100  | 2.29585900  |
| C | 1.08998900  | 3.33255900  | 0.22426700  |
| C | 0.19921400  | 2.39178700  | -0.56849500 |
| H | -0.75490700 | 2.88233900  | -0.81917200 |
| H | 0.64236100  | 2.01633500  | -1.49766900 |

**TS5**

0 1

|   |             |             |             |
|---|-------------|-------------|-------------|
| C | -1.39813900 | -3.14319800 | -1.70387500 |
| C | -0.52409900 | -3.50913000 | -0.64731900 |
| C | -0.81758500 | -4.64795700 | 0.12851300  |
| C | -1.96304600 | -5.41156100 | -0.11481500 |
| C | -2.83961400 | -5.03797400 | -1.13954000 |
| C | -2.55393100 | -3.91631400 | -1.92195000 |
| C | -1.17164100 | -1.96150800 | -2.58150400 |
| C | -2.10797200 | -0.91051300 | -2.59407300 |
| C | -1.91804200 | 0.20209900  | -3.41881000 |
| C | -0.79334400 | 0.27570800  | -4.24985700 |
| C | 0.14361600  | -0.76464500 | -4.24792900 |
| C | -0.04607000 | -1.87825300 | -3.42104400 |



|   |             |             |             |
|---|-------------|-------------|-------------|
| H | -0.16205300 | -4.93217200 | 0.94756500  |
| H | -2.17543400 | -6.28192200 | 0.50391100  |
| H | -3.74578600 | -5.61181600 | -1.32638800 |
| H | -3.23291300 | -3.62117000 | -2.71981300 |
| H | -2.97765000 | -0.96364200 | -1.94644400 |
| H | -2.64475700 | 1.01084100  | -3.40688600 |
| H | -0.65191600 | 1.14079400  | -4.89493600 |
| H | 1.01797900  | -0.71714000 | -4.89636800 |
| H | 0.66998500  | -2.69579100 | -3.44381300 |
| P | 0.94344800  | -2.48576800 | -0.22124100 |
| C | 2.36733200  | -3.30660600 | -1.12002600 |
| C | 3.50216600  | -2.30779600 | -1.42602700 |
| C | 2.87871300  | -4.57514900 | -0.40385900 |
| H | 1.92752200  | -3.62702700 | -2.07513200 |
| C | 4.63589200  | -2.98951200 | -2.21235600 |
| H | 3.89573800  | -1.89788400 | -0.48834700 |
| H | 3.09903800  | -1.45938300 | -1.99544000 |
| C | 4.00548300  | -5.23660200 | -1.22201200 |
| H | 3.27016500  | -4.30662200 | 0.58722400  |
| H | 2.05017100  | -5.28165000 | -0.25490600 |
| C | 5.15315600  | -4.24403100 | -1.48394300 |
| H | 5.45359600  | -2.27206700 | -2.37575800 |
| H | 4.25888900  | -3.28078200 | -3.20683300 |
| H | 4.37698000  | -6.12312100 | -0.68794500 |
| H | 3.59697200  | -5.58295400 | -2.18549500 |
| H | 5.94774900  | -4.72595300 | -2.07207000 |
| H | 5.59353400  | -3.94375000 | -0.51943000 |
| C | 1.22276800  | -2.70523400 | 1.60669200  |
| C | 2.50865600  | -1.97398600 | 2.05665100  |
| C | -0.00336300 | -2.16551500 | 2.37444800  |

|    |             |             |             |
|----|-------------|-------------|-------------|
| H  | 1.34388400  | -3.77718800 | 1.81609100  |
| C  | 2.69828000  | -2.10722100 | 3.57976600  |
| H  | 2.42829900  | -0.91016000 | 1.78814700  |
| H  | 3.39042100  | -2.36667400 | 1.53753900  |
| C  | 0.19196000  | -2.27693900 | 3.89663900  |
| H  | -0.14245800 | -1.10690100 | 2.10460700  |
| H  | -0.90860600 | -2.69700200 | 2.06826800  |
| C  | 1.47938200  | -1.56391800 | 4.34557700  |
| H  | 3.61290400  | -1.57680500 | 3.87440500  |
| H  | 2.84254800  | -3.17089200 | 3.83380600  |
| H  | -0.68662300 | -1.85392300 | 4.40417200  |
| H  | 0.25026400  | -3.34158500 | 4.17829800  |
| H  | 1.62455500  | -1.67996500 | 5.42953900  |
| H  | 1.38141700  | -0.48421300 | 4.14284000  |
| Au | 0.86912100  | -0.19737300 | -0.59129300 |
| C  | 2.51242100  | 8.57122600  | -0.24048000 |
| C  | 2.36554000  | 7.21067000  | -0.52311700 |
| C  | 3.27853100  | 6.26861600  | 0.00823700  |
| C  | 4.33785800  | 6.72657200  | 0.82700900  |
| C  | 4.47449600  | 8.08939000  | 1.10406000  |
| C  | 3.56506600  | 9.01566200  | 0.57280200  |
| H  | 1.80299100  | 9.28640300  | -0.65470400 |
| H  | 1.54814200  | 6.86231500  | -1.15219400 |
| H  | 5.04182500  | 6.00481000  | 1.23694700  |
| H  | 5.29329200  | 8.43016500  | 1.73647900  |
| H  | 3.67534500  | 10.07672200 | 0.79212400  |
| C  | 3.12826700  | 4.87900300  | -0.27652500 |
| C  | 3.00225500  | 3.69253000  | -0.52097900 |
| C  | 2.75731500  | 2.27100500  | -0.82322000 |
| O  | -0.66301000 | 2.74564900  | -1.86430900 |

|   |             |             |             |
|---|-------------|-------------|-------------|
| C | -1.75136000 | 2.67179600  | -0.10265300 |
| H | -1.39882700 | 1.65866000  | 0.06391100  |
| H | -1.15936400 | 3.51643300  | 0.22274200  |
| H | -2.63073100 | 2.83113500  | -0.71483500 |
| C | 3.69507900  | 1.43689300  | -0.06500300 |
| C | 4.49110800  | 0.75083600  | 0.54857300  |
| C | 5.39913100  | -0.07539800 | 1.27203600  |
| C | 6.19519100  | -1.03189000 | 0.59816600  |
| C | 5.50685700  | 0.03450500  | 2.67803700  |
| C | 7.06190000  | -1.86054900 | 1.31572900  |
| H | 6.12143900  | -1.11753100 | -0.48317500 |
| C | 6.37968500  | -0.79593000 | 3.38622300  |
| H | 4.89852100  | 0.77049100  | 3.19987700  |
| C | 7.15573400  | -1.74878500 | 2.71074000  |
| H | 7.66835200  | -2.59300000 | 0.78467200  |
| H | 6.45132800  | -0.70187700 | 4.46889000  |
| H | 7.83274800  | -2.39592900 | 3.26642200  |
| C | 2.84937000  | 2.01015400  | -2.37512100 |
| H | 2.90700300  | 0.92348900  | -2.51755700 |
| H | 3.73513900  | 2.48399400  | -2.81030000 |
| C | 1.51710600  | 2.55044700  | -2.91754800 |
| H | 1.58759900  | 3.61721900  | -3.17601600 |
| H | 1.14429300  | 2.01302900  | -3.79515900 |
| C | 0.54432600  | 2.43409700  | -1.74833200 |
| C | 1.23969900  | 1.95797200  | -0.56068100 |
| H | 0.86909900  | 2.33308100  | 0.39762200  |
| O | -2.80750000 | 2.74903200  | 1.51855600  |
| H | -3.56595800 | 2.11678900  | 1.28013800  |
| H | -2.34262300 | 2.25857100  | 2.21681300  |
| N | -4.58436300 | 0.89269500  | 0.88628500  |

|   |             |             |             |
|---|-------------|-------------|-------------|
| S | -5.75074600 | 1.10591900  | -0.26179800 |
| S | -4.51467600 | -0.31563900 | 1.99612700  |
| O | -6.50472800 | -0.09751000 | -0.62642500 |
| O | -5.14197900 | 1.95912800  | -1.29365600 |
| O | -3.50915600 | 0.12654300  | 2.98144400  |
| O | -5.78750600 | -0.89633700 | 2.43004800  |
| C | -6.98585800 | 2.25873900  | 0.64694400  |
| C | -3.61198900 | -1.68761000 | 1.01131600  |
| F | -7.51325800 | 1.63819900  | 1.71066400  |
| F | -6.34756300 | 3.37019000  | 1.05540400  |
| F | -7.97078900 | 2.60459900  | -0.19927300 |
| F | -2.43766700 | -1.20104200 | 0.56120900  |
| F | -3.37248900 | -2.73965300 | 1.81442100  |
| F | -4.34686000 | -2.09318700 | -0.03177800 |

**IM4**

0 1

|   |            |             |             |
|---|------------|-------------|-------------|
| C | 5.36307800 | 1.43708800  | -1.11603300 |
| C | 4.76943200 | 0.23915400  | -1.59675400 |
| C | 5.26304400 | -0.34389300 | -2.78077700 |
| C | 6.31140800 | 0.24555500  | -3.49508000 |
| C | 6.87637200 | 1.44180900  | -3.03733800 |
| C | 6.40210500 | 2.02703600  | -1.85929500 |
| C | 4.91654400 | 2.09706700  | 0.14374500  |
| C | 4.25059000 | 3.33471700  | 0.09288900  |
| C | 3.76387000 | 3.92734300  | 1.26321800  |
| C | 3.94281700 | 3.29240100  | 2.49824700  |
| C | 4.62004000 | 2.06818000  | 2.56154800  |
| C | 5.10846500 | 1.47706500  | 1.39154700  |
| H | 4.81508400 | -1.25804400 | -3.16251900 |
| H | 6.67647800 | -0.22320800 | -4.40788300 |

|   |            |             |             |
|---|------------|-------------|-------------|
| H | 7.68525000 | 1.91611500  | -3.59146600 |
| H | 6.84565500 | 2.95090900  | -1.49102300 |
| H | 4.07251600 | 3.80671400  | -0.87147800 |
| H | 3.20205500 | 4.85548200  | 1.19814000  |
| H | 3.55020000 | 3.74560600  | 3.40697700  |
| H | 4.76836700 | 1.57164200  | 3.51981700  |
| H | 5.64525600 | 0.53337300  | 1.44557200  |
| P | 3.32290900 | -0.51195600 | -0.73080700 |
| C | 4.07991000 | -1.78621700 | 0.41228900  |
| C | 3.19923700 | -2.04045900 | 1.65299300  |
| C | 4.47294300 | -3.09554700 | -0.30363100 |
| H | 5.01028900 | -1.30982000 | 0.75018000  |
| C | 3.90291600 | -3.01066200 | 2.61947600  |
| H | 2.23640600 | -2.46761700 | 1.34728400  |
| H | 2.97489700 | -1.08659900 | 2.14893000  |
| C | 5.16386700 | -4.05906300 | 0.68282000  |
| H | 3.57310500 | -3.58233300 | -0.70564900 |
| H | 5.13759200 | -2.87513100 | -1.15135600 |
| C | 4.27583300 | -4.32662800 | 1.91262800  |
| H | 3.24930200 | -3.21028300 | 3.47913600  |
| H | 4.82053900 | -2.53463400 | 3.00508300  |
| H | 5.40742800 | -5.00118000 | 0.16975900  |
| H | 6.11590600 | -3.61204100 | 1.01400900  |
| H | 4.78873900 | -5.00477100 | 2.61062200  |
| H | 3.35039200 | -4.82961100 | 1.58836200  |
| C | 2.37850300 | -1.44812800 | -2.03563300 |
| C | 1.20039200 | -2.21562800 | -1.39292700 |
| C | 1.84986900 | -0.47692800 | -3.11372100 |
| H | 3.05124100 | -2.18267200 | -2.50224100 |
| C | 0.42928300 | -3.00217000 | -2.47047000 |

|    |             |             |             |
|----|-------------|-------------|-------------|
| H  | 0.52993500  | -1.49290000 | -0.90658500 |
| H  | 1.55366200  | -2.89762000 | -0.61154400 |
| C  | 1.06462600  | -1.24404700 | -4.19601700 |
| H  | 1.19224100  | 0.25673400  | -2.62253800 |
| H  | 2.67688100  | 0.08303800  | -3.56942200 |
| C  | -0.08081800 | -2.07413200 | -3.58689100 |
| H  | -0.41298200 | -3.53439300 | -2.00686100 |
| H  | 1.09814600  | -3.76514600 | -2.90333800 |
| H  | 0.66925100  | -0.53466700 | -4.93754800 |
| H  | 1.75751100  | -1.91735200 | -4.72831200 |
| H  | -0.58362300 | -2.66033700 | -4.36977000 |
| H  | -0.83186300 | -1.39454100 | -3.16411200 |
| Au | 1.81010400  | 0.95137200  | 0.23426300  |
| C  | -6.93423200 | 1.77059300  | 1.82685800  |
| C  | -5.60076900 | 1.63506800  | 2.22310400  |
| C  | -4.58337700 | 2.38023800  | 1.57495100  |
| C  | -4.94793100 | 3.27152900  | 0.53348300  |
| C  | -6.28609400 | 3.39914600  | 0.14887700  |
| C  | -7.28234400 | 2.64930600  | 0.79022800  |
| H  | -7.70315300 | 1.18184000  | 2.32478400  |
| H  | -5.32461500 | 0.94137600  | 3.01294400  |
| H  | -4.17108800 | 3.83940100  | 0.02679500  |
| H  | -6.54793800 | 4.07566000  | -0.66268700 |
| H  | -8.32188600 | 2.74423700  | 0.48055900  |
| C  | -3.20990600 | 2.17223200  | 1.89591800  |
| C  | -2.03194000 | 1.93088800  | 2.09072100  |
| C  | -0.60746100 | 1.55492400  | 2.13823000  |
| O  | 0.74117100  | 4.40482500  | 0.36958800  |
| C  | -0.52073100 | 0.09836400  | 2.28711500  |
| C  | -0.41861300 | -1.11132100 | 2.37709900  |

|   |             |             |             |
|---|-------------|-------------|-------------|
| C | -0.25851900 | -2.52536200 | 2.42283600  |
| C | 0.36635700  | -3.15007700 | 3.52740300  |
| C | -0.69007000 | -3.32641900 | 1.33887700  |
| C | 0.56148500  | -4.53352900 | 3.53963900  |
| H | 0.70067000  | -2.53716200 | 4.36217900  |
| C | -0.48985100 | -4.70906800 | 1.36042700  |
| H | -1.17655700 | -2.85256700 | 0.49109600  |
| C | 0.13908600  | -5.31843500 | 2.45655400  |
| H | 1.04869600  | -5.00077600 | 4.39458300  |
| H | -0.82757000 | -5.31323300 | 0.51912900  |
| H | 0.29475500  | -6.39637900 | 2.46916400  |
| C | 0.18757200  | 2.30762500  | 3.26986200  |
| H | 1.14328300  | 1.77996000  | 3.38216500  |
| H | -0.35313500 | 2.28600500  | 4.22284600  |
| C | 0.41988500  | 3.70960100  | 2.69567500  |
| H | -0.42819500 | 4.37762800  | 2.91091200  |
| H | 1.33252800  | 4.19567800  | 3.05870500  |
| C | 0.46706100  | 3.51472300  | 1.16807800  |
| C | 0.09986400  | 2.10876000  | 0.84482500  |
| H | -0.54890200 | 2.06528800  | -0.03221800 |
| H | -4.77048200 | 0.81707000  | -0.13321000 |
| N | -4.53498200 | 0.04469400  | -0.76850500 |
| S | -4.14909700 | 0.49510800  | -2.37254900 |
| S | -4.34698100 | -1.48376800 | -0.01243000 |
| O | -4.94791100 | 1.67752800  | -2.66964600 |
| O | -4.12108900 | -0.69818400 | -3.20333400 |
| O | -3.39829800 | -2.29106900 | -0.76507900 |
| O | -4.25568100 | -1.23145400 | 1.41843300  |
| C | -2.32188700 | 1.09816600  | -2.15401400 |
| C | -6.10254400 | -2.20367500 | -0.33265600 |

|   |             |             |             |
|---|-------------|-------------|-------------|
| F | -1.66410900 | 0.25710500  | -1.35270100 |
| F | -1.73818100 | 1.13371100  | -3.35516200 |
| F | -2.34387700 | 2.32146600  | -1.62104600 |
| F | -6.30868600 | -2.32677500 | -1.64390300 |
| F | -6.17308200 | -3.40020100 | 0.25843700  |
| F | -7.01137100 | -1.37846400 | 0.19895900  |

**TS6**

0 1

|   |            |             |             |
|---|------------|-------------|-------------|
| C | 4.18523800 | -3.04240400 | -0.34693400 |
| C | 4.26750700 | -2.03574900 | 0.65077800  |
| C | 5.02845400 | -2.27355700 | 1.81289600  |
| C | 5.68852700 | -3.49150000 | 2.00281500  |
| C | 5.58371200 | -4.49637400 | 1.03414200  |
| C | 4.83990400 | -4.26797400 | -0.12778800 |
| C | 3.42570100 | -2.84578500 | -1.61475500 |
| C | 2.22220100 | -3.54067100 | -1.82983000 |
| C | 1.46276600 | -3.29939300 | -2.98044800 |
| C | 1.89718600 | -2.36521700 | -3.92898800 |
| C | 3.10782000 | -1.68691200 | -3.73490300 |
| C | 3.86938200 | -1.93096200 | -2.58684300 |
| H | 5.09622200 | -1.51252400 | 2.58606200  |
| H | 6.26954700 | -3.65633000 | 2.90877800  |
| H | 6.08364700 | -5.45295200 | 1.17877000  |
| H | 4.76641700 | -5.04131000 | -0.89087700 |
| H | 1.85905600 | -4.23167500 | -1.07222800 |
| H | 0.51381500 | -3.81317700 | -3.10604300 |
| H | 1.29777400 | -2.16820500 | -4.81647800 |
| H | 3.46125500 | -0.97100100 | -4.47597300 |
| H | 4.81850300 | -1.41901800 | -2.44769600 |



|   |            |             |             |
|---|------------|-------------|-------------|
| P | 3.35424000 | -0.44837800 | 0.48718900  |
| C | 4.54861800 | 0.71592800  | -0.34628100 |
| C | 3.83864900 | 1.82273300  | -1.15193800 |
| C | 5.59320100 | 1.28428700  | 0.63837100  |
| H | 5.08234700 | 0.07055200  | -1.05619400 |
| C | 4.87653100 | 2.69227400  | -1.88597900 |
| H | 3.24634400 | 2.45554600  | -0.48054100 |
| H | 3.13471400 | 1.36822800  | -1.86234800 |
| C | 6.61284400 | 2.16267400  | -0.11394300 |
| H | 5.08888000 | 1.89516400  | 1.40053800  |
| H | 6.10858800 | 0.46302400  | 1.15668500  |
| C | 5.90670600 | 3.27972000  | -0.90419200 |
| H | 4.36054700 | 3.49689500  | -2.42631000 |
| H | 5.40076300 | 2.07496500  | -2.63474800 |
| H | 7.32998900 | 2.58866100  | 0.60259200  |
| H | 7.18510000 | 1.53016700  | -0.81213200 |
| H | 6.64642000 | 3.88702400  | -1.44577300 |
| H | 5.38686300 | 3.94915800  | -0.19974600 |
| C | 3.03171700 | 0.17326200  | 2.21132700  |
| C | 2.34464600 | 1.55721500  | 2.14430300  |
| C | 2.14979500 | -0.83512900 | 2.98343200  |
| H | 4.00076100 | 0.28885200  | 2.71743300  |
| C | 2.01728300 | 2.07432400  | 3.55683500  |
| H | 1.41181200 | 1.46262900  | 1.57017700  |
| H | 2.97272500 | 2.28261000  | 1.61553700  |
| C | 1.81909900 | -0.30880000 | 4.39292800  |
| H | 1.21070400 | -0.97972400 | 2.42976100  |
| H | 2.64594800 | -1.81198600 | 3.04652000  |
| C | 1.14124200 | 1.07147100  | 4.32747200  |
| H | 1.51042700 | 3.04675700  | 3.47565300  |

|    |             |             |             |
|----|-------------|-------------|-------------|
| H  | 2.95763000  | 2.24288500  | 4.10824600  |
| H  | 1.16576500  | -1.03068300 | 4.90214800  |
| H  | 2.74875100  | -0.23293700 | 4.98217900  |
| H  | 0.93590700  | 1.44401600  | 5.34157500  |
| H  | 0.17473700  | 0.96540200  | 3.81309900  |
| Au | 1.29305900  | -0.59022500 | -0.49056200 |
| C  | -7.59503100 | 1.68919100  | -1.87442700 |
| C  | -6.27900900 | 1.23603900  | -1.99529000 |
| C  | -5.20432500 | 2.06164900  | -1.59161200 |
| C  | -5.48101700 | 3.34466000  | -1.06381800 |
| C  | -6.80110500 | 3.78758100  | -0.94893900 |
| C  | -7.86167600 | 2.96360600  | -1.35393100 |
| H  | -8.41580900 | 1.04130400  | -2.17933300 |
| H  | -6.06475200 | 0.24095700  | -2.37523000 |
| H  | -4.65449600 | 3.97609500  | -0.74329700 |
| H  | -7.00384300 | 4.77590900  | -0.53789100 |
| H  | -8.88990200 | 3.31006800  | -1.25770100 |
| C  | -3.85886500 | 1.60185500  | -1.69385700 |
| C  | -2.71151400 | 1.20460100  | -1.75840700 |
| C  | -1.31125800 | 0.74842400  | -1.80038700 |
| O  | -1.10576900 | -2.88801800 | -1.22640800 |
| C  | -0.45431700 | 1.89525200  | -1.47685700 |
| C  | 0.22920100  | 2.85157200  | -1.16062300 |
| C  | 1.04470000  | 3.93892100  | -0.73653800 |
| C  | 1.09586600  | 4.29313700  | 0.63264700  |
| C  | 1.83930600  | 4.65706200  | -1.65997100 |
| C  | 1.93283500  | 5.32576000  | 1.06243200  |
| H  | 0.48347100  | 3.74517200  | 1.34472800  |
| C  | 2.67058200  | 5.69039500  | -1.22057700 |
| H  | 1.80041900  | 4.38849100  | -2.71363400 |

|   |             |             |             |
|---|-------------|-------------|-------------|
| C | 2.72548800  | 6.02545200  | 0.14038200  |
| H | 1.96606700  | 5.58593700  | 2.11955100  |
| H | 3.28041900  | 6.23390600  | -1.94088700 |
| H | 3.37672200  | 6.83006000  | 0.47863500  |
| C | -0.96519000 | 0.11409000  | -3.20473900 |
| H | 0.13031700  | 0.11897100  | -3.29727700 |
| H | -1.40697500 | 0.69206800  | -4.02313000 |
| C | -1.46991200 | -1.32969500 | -3.09865800 |
| H | -2.56180400 | -1.37716900 | -3.22574000 |
| H | -1.00408400 | -2.02212500 | -3.80702800 |
| C | -1.16944900 | -1.74487000 | -1.65255400 |
| C | -1.07311400 | -0.47930500 | -0.86486100 |
| H | -0.71641300 | -0.35037600 | 0.17672500  |
| H | -2.20418900 | -0.76060200 | -0.14814900 |
| N | -3.18590900 | -1.03326400 | 0.71847600  |
| S | -4.66872300 | -1.58979800 | 0.17741400  |
| S | -2.82730300 | -0.54904400 | 2.26719700  |
| O | -4.58159000 | -1.58629000 | -1.28533500 |
| O | -5.81115400 | -1.01402100 | 0.88727300  |
| O | -3.77735500 | -0.99766500 | 3.28317300  |
| O | -1.37894900 | -0.74909500 | 2.42797200  |
| C | -4.61245700 | -3.45375000 | 0.66625500  |
| C | -3.01453600 | 1.36061800  | 2.15102500  |
| F | -4.34062800 | -3.59764400 | 1.96890700  |
| F | -5.82200000 | -3.98182000 | 0.40425400  |
| F | -3.68688400 | -4.08868000 | -0.05691600 |
| F | -4.22202400 | 1.69533400  | 1.69322300  |
| F | -2.83561100 | 1.88476900  | 3.37674800  |
| F | -2.06837400 | 1.85410900  | 1.32889400  |

**P<sub>2</sub>**

0 1

|   |             |             |             |
|---|-------------|-------------|-------------|
| C | -5.49797100 | -1.68312100 | -0.02272500 |
| C | -4.44415700 | -0.76592800 | 0.01336300  |
| C | -3.10446600 | -1.22001800 | 0.03413400  |
| C | -2.85040300 | -2.61200700 | 0.01827300  |
| C | -3.91180900 | -3.51999600 | -0.01836100 |
| C | -5.23691600 | -3.06104300 | -0.03852600 |
| H | -6.52541000 | -1.32189600 | -0.03913900 |
| H | -4.64321700 | 0.30422000  | 0.02308700  |
| H | -1.82066100 | -2.96391300 | 0.03391300  |
| H | -3.70404200 | -4.58916900 | -0.03101800 |
| H | -6.06054000 | -3.77313600 | -0.06681000 |
| C | -2.02245500 | -0.29044000 | 0.06906200  |
| C | -1.09000300 | 0.49120500  | 0.09480700  |
| C | 0.01695400  | 1.46268400  | 0.12242300  |
| O | -1.75951000 | 4.36242000  | -1.12206000 |
| C | 1.30361200  | 0.76294000  | 0.06285200  |
| C | 2.37508100  | 0.18664200  | 0.02630300  |
| C | 3.63121100  | -0.48952500 | -0.01707800 |
| C | 4.36825100  | -0.71080900 | 1.17048900  |
| C | 4.15429800  | -0.95731700 | -1.24587700 |
| C | 5.59553800  | -1.37737600 | 1.12433200  |
| H | 3.96785700  | -0.35537900 | 2.11809800  |
| C | 5.38268000  | -1.62277700 | -1.28064500 |
| H | 3.58897200  | -0.79213200 | -2.16115600 |
| C | 6.10663100  | -1.83598500 | -0.09853800 |
| H | 6.15355500  | -1.54162600 | 2.04526300  |
| H | 5.77505000  | -1.97825200 | -2.23251100 |
| H | 7.06325100  | -2.35563300 | -0.13014400 |

|   |             |            |             |
|---|-------------|------------|-------------|
| C | -0.10106100 | 2.38185300 | 1.40524900  |
| H | 0.85498600  | 2.90903900 | 1.52255600  |
| H | -0.28798900 | 1.78267900 | 2.30196500  |
| C | -1.22490400 | 3.37075100 | 1.05894600  |
| H | -2.21431800 | 2.95053200 | 1.29509700  |
| H | -1.14597100 | 4.34178300 | 1.56272400  |
| C | -1.15282700 | 3.54354500 | -0.46591300 |
| C | -0.16631600 | 2.50983000 | -1.02813800 |
| H | 0.79259700  | 3.02508500 | -1.19580600 |
| H | -0.50385100 | 2.07978600 | -1.97623400 |

**TS7**

0 1

|   |             |             |             |
|---|-------------|-------------|-------------|
| C | 2.38538800  | 5.23248100  | -0.84400100 |
| C | 1.48469000  | 4.19788800  | -1.10740000 |
| C | 1.53204200  | 3.50693700  | -2.34177600 |
| C | 2.49397300  | 3.89039100  | -3.30423000 |
| C | 3.38837500  | 4.92938100  | -3.03236800 |
| C | 3.34213300  | 5.60044500  | -1.80176100 |
| H | 2.33954200  | 5.75266300  | 0.11197900  |
| H | 0.74368200  | 3.90854100  | -0.36895600 |
| H | 2.53397000  | 3.36238600  | -4.25502900 |
| H | 4.12720800  | 5.21279100  | -3.78077300 |
| H | 4.04350500  | 6.40695000  | -1.59279500 |
| C | 0.64946400  | 2.41265400  | -2.57622200 |
| C | -0.09683100 | 1.46170800  | -2.71014300 |
| C | -0.99400500 | 0.32247900  | -2.81918600 |
| O | -4.42766000 | -0.91649500 | -3.03107600 |
| C | -5.15887700 | -0.27265300 | -1.94303900 |
| H | -4.59313100 | -0.33967700 | -1.00971100 |

|   |             |             |             |
|---|-------------|-------------|-------------|
| H | -5.34892300 | 0.77886000  | -2.18528200 |
| H | -6.09839400 | -0.82784700 | -1.86568600 |
| C | -0.67735000 | -0.83059300 | -1.83440100 |
| C | -1.37344600 | -1.90748000 | -1.87848200 |
| C | -1.95561700 | -3.12160100 | -1.44434900 |
| C | -2.35221900 | -4.13361800 | -2.34962000 |
| C | -2.09101000 | -3.33509900 | -0.04927100 |
| C | -2.86839300 | -5.33587800 | -1.86698500 |
| H | -2.25551300 | -3.95596300 | -3.41777300 |
| C | -2.58764200 | -4.55191900 | 0.41874300  |
| H | -1.79168700 | -2.54632900 | 0.63397000  |
| C | -2.98016900 | -5.55200200 | -0.48341900 |
| H | -3.18273100 | -6.10893800 | -2.56634300 |
| H | -2.68404400 | -4.71196500 | 1.49153300  |
| H | -3.38092500 | -6.49394700 | -0.11177000 |
| C | -1.04400200 | -0.35305100 | -4.23456100 |
| H | -0.15344100 | -0.95816900 | -4.43671100 |
| H | -1.11535900 | 0.44255000  | -4.99574900 |
| C | -2.32602000 | -1.14118200 | -4.12699500 |
| H | -2.59384100 | -1.99629300 | -4.73936600 |
| C | -3.17813100 | -0.51361000 | -3.25180200 |
| C | -2.50451900 | 0.67889900  | -2.59653900 |
| H | -2.75169800 | 1.60171800  | -3.14458100 |
| H | -2.75219500 | 0.81922100  | -1.54274100 |
| C | 3.33031000  | -3.22333000 | 1.26167900  |
| C | 3.38984300  | -1.92568400 | 1.83257200  |
| C | 4.00665600  | -1.75600200 | 3.08856000  |
| C | 4.54460500  | -2.84252000 | 3.78442400  |
| C | 4.46119200  | -4.12714900 | 3.23508400  |
| C | 3.85737600  | -4.30900300 | 1.98780400  |

|   |            |             |             |
|---|------------|-------------|-------------|
| C | 2.72332600 | -3.49571000 | -0.07122100 |
| C | 1.56252500 | -4.28485300 | -0.15901200 |
| C | 0.95686700 | -4.52122400 | -1.39674700 |
| C | 1.49946900 | -3.96725100 | -2.56280000 |
| C | 2.66600400 | -3.19616500 | -2.48901000 |
| C | 3.27908900 | -2.96868000 | -1.25187400 |
| H | 4.05415900 | -0.76866800 | 3.53994500  |
| H | 5.01636300 | -2.68472800 | 4.75309600  |
| H | 4.86760100 | -4.98308800 | 3.77205800  |
| H | 3.79975700 | -5.30390600 | 1.54888700  |
| H | 1.12200800 | -4.68689400 | 0.75159600  |
| H | 0.04704800 | -5.11429600 | -1.44576900 |
| H | 1.01311000 | -4.13447700 | -3.52269000 |
| H | 3.09863300 | -2.76706700 | -3.39185400 |
| H | 4.18879500 | -2.37564100 | -1.19874200 |
| P | 2.67313500 | -0.45045000 | 0.99219500  |
| C | 4.13704500 | 0.28056900  | 0.07320400  |
| C | 3.71258600 | 1.02800200  | -1.20612200 |
| C | 5.03261800 | 1.15602200  | 0.97534000  |
| H | 4.72426100 | -0.60064900 | -0.22172800 |
| C | 4.94829800 | 1.53181000  | -1.97345800 |
| H | 3.07724900 | 1.88022300  | -0.93682700 |
| H | 3.10603600 | 0.36777300  | -1.84017900 |
| C | 6.26147700 | 1.66078300  | 0.19149600  |
| H | 4.45659700 | 2.02348900  | 1.32937800  |
| H | 5.35433000 | 0.58656700  | 1.85886400  |
| C | 5.83814100 | 2.41576700  | -1.08216600 |
| H | 4.62295200 | 2.08927000  | -2.86172300 |
| H | 5.53350100 | 0.66363300  | -2.32156400 |
| H | 6.86978000 | 2.30792700  | 0.84042300  |

|    |             |             |             |
|----|-------------|-------------|-------------|
| H  | 6.88854900  | 0.79838200  | -0.08858500 |
| H  | 6.72652900  | 2.74837300  | -1.63892000 |
| H  | 5.27341200  | 3.31865400  | -0.80041500 |
| C  | 2.21022800  | 0.73670400  | 2.33661800  |
| C  | 1.61766200  | 2.02320700  | 1.71622700  |
| C  | 1.19348800  | 0.09756100  | 3.30554800  |
| H  | 3.12500900  | 1.00588900  | 2.88435900  |
| C  | 1.25892600  | 3.02758200  | 2.82933600  |
| H  | 0.71328900  | 1.75432400  | 1.14922000  |
| H  | 2.32041200  | 2.47673100  | 1.00677600  |
| C  | 0.83719500  | 1.09228700  | 4.42743700  |
| H  | 0.28745100  | -0.16050300 | 2.74088600  |
| H  | 1.59427000  | -0.82986400 | 3.73535200  |
| C  | 0.28844300  | 2.41050700  | 3.85264400  |
| H  | 0.81488600  | 3.92869500  | 2.38356500  |
| H  | 2.18652000  | 3.33961200  | 3.33925300  |
| H  | 0.09301000  | 0.63693100  | 5.09594700  |
| H  | 1.73980400  | 1.29531100  | 5.02952400  |
| H  | 0.08948600  | 3.12633800  | 4.66365200  |
| H  | -0.67162000 | 2.20401700  | 3.36464000  |
| Au | 0.85339300  | -0.78434700 | -0.40178200 |
| N  | -3.35219900 | 1.16164100  | 0.67330500  |
| S  | -3.00645700 | 0.36680400  | 2.05261500  |
| S  | -4.06186700 | 2.63342100  | 0.59594300  |
| O  | -2.99129900 | 1.14248500  | 3.30229600  |
| O  | -1.88615800 | -0.54897700 | 1.76922100  |
| O  | -4.63972300 | 2.75684900  | -0.75253400 |
| O  | -4.83380900 | 3.07782900  | 1.76391900  |
| C  | -4.52029500 | -0.80350500 | 2.20174600  |
| C  | -2.52514500 | 3.77839500  | 0.52679000  |



|   |             |             |             |
|---|-------------|-------------|-------------|
| F | -5.66182500 | -0.09833300 | 2.25814700  |
| F | -4.58012600 | -1.63556700 | 1.13773800  |
| F | -4.40835200 | -1.55021200 | 3.31738500  |
| F | -1.74625200 | 3.44594300  | -0.52331400 |
| F | -2.90952700 | 5.05993700  | 0.38890500  |
| F | -1.79181300 | 3.66561400  | 1.65144600  |

**F**

0 1

|   |             |             |             |
|---|-------------|-------------|-------------|
| C | 2.17902200  | 5.34475500  | -0.93596800 |
| C | 1.35250200  | 4.24731300  | -1.18676700 |
| C | 1.41949200  | 3.57145700  | -2.42906100 |
| C | 2.32977200  | 4.02932900  | -3.40888400 |
| C | 3.15141100  | 5.12992400  | -3.14830300 |
| C | 3.08296800  | 5.78915600  | -1.91257500 |
| H | 2.11781100  | 5.85331000  | 0.02544200  |
| H | 0.65568000  | 3.89629300  | -0.43188200 |
| H | 2.38744200  | 3.51131900  | -4.36437200 |
| H | 3.85089300  | 5.47145900  | -3.91019000 |
| H | 3.72689100  | 6.64441400  | -1.71281000 |
| C | 0.60349200  | 2.42502200  | -2.65396000 |
| C | -0.09126400 | 1.43390300  | -2.77802500 |
| C | -0.94819900 | 0.26846100  | -2.83208900 |
| O | -4.25600800 | -1.16176300 | -2.74890800 |
| C | -5.17824600 | -0.36426600 | -1.90324000 |
| H | -4.65732900 | -0.05673000 | -0.99616500 |
| H | -5.50419600 | 0.50443200  | -2.48250900 |
| H | -6.01004600 | -1.03968500 | -1.69439100 |
| C | -0.60562600 | -0.91143500 | -1.85232100 |
| C | -1.36705200 | -1.96452500 | -2.29098800 |

|   |             |             |             |
|---|-------------|-------------|-------------|
| C | -1.68007500 | -3.23236300 | -1.62788200 |
| C | -2.04695100 | -4.37574100 | -2.36911900 |
| C | -1.59934400 | -3.33601600 | -0.22240800 |
| C | -2.29211400 | -5.59490000 | -1.72857500 |
| H | -2.11439900 | -4.32059300 | -3.45453200 |
| C | -1.84313900 | -4.55422600 | 0.41416000  |
| H | -1.36470100 | -2.45127700 | 0.36089400  |
| C | -2.18410900 | -5.69126700 | -0.33384100 |
| H | -2.56271900 | -6.47046700 | -2.31772800 |
| H | -1.78102200 | -4.61090600 | 1.50031200  |
| H | -2.37790100 | -6.63953300 | 0.16612700  |
| C | -1.05962700 | -0.50446900 | -4.18182800 |
| H | -0.10969900 | -0.96412200 | -4.47637700 |
| H | -1.46245100 | 0.11995200  | -4.99173300 |
| C | -2.05224500 | -1.55214600 | -3.64336000 |
| H | -2.42405700 | -2.35896100 | -4.27425800 |
| C | -3.06291200 | -0.72464800 | -2.95524600 |
| C | -2.46133000 | 0.58449700  | -2.53578600 |
| H | -2.86025100 | 1.39340300  | -3.17012300 |
| H | -2.64702800 | 0.83613400  | -1.48828300 |
| C | 3.48945000  | -3.04882400 | 1.26498600  |
| C | 3.42169500  | -1.77453800 | 1.88544200  |
| C | 3.98893600  | -1.60396900 | 3.16391200  |
| C | 4.59835700  | -2.66850100 | 3.83527300  |
| C | 4.64004500  | -3.93270700 | 3.23605500  |
| C | 4.08869800  | -4.11448500 | 1.96450400  |
| C | 2.93986900  | -3.31962600 | -0.09343100 |
| C | 1.84880200  | -4.19432600 | -0.23526800 |
| C | 1.29384000  | -4.44166700 | -1.49371600 |
| C | 1.81856900  | -3.81347300 | -2.62908100 |

|   |            |             |             |
|---|------------|-------------|-------------|
| C | 2.91578900 | -2.95259400 | -2.50238300 |
| C | 3.47819100 | -2.71306900 | -1.24374200 |
| H | 3.94108900 | -0.63414600 | 3.65212800  |
| H | 5.02783500 | -2.51064700 | 4.82356700  |
| H | 5.10351600 | -4.77215600 | 3.75260000  |
| H | 4.12833200 | -5.09217600 | 1.48640900  |
| H | 1.41549600 | -4.65410900 | 0.65070800  |
| H | 0.43446800 | -5.10125300 | -1.57950300 |
| H | 1.37048700 | -3.99055800 | -3.60594500 |
| H | 3.33461600 | -2.46291100 | -3.38078900 |
| H | 4.33701700 | -2.05326600 | -1.15462600 |
| P | 2.60939600 | -0.34018500 | 1.05658100  |
| C | 4.05580200 | 0.49954000  | 0.19543600  |
| C | 3.61919600 | 1.22591400  | -1.09117700 |
| C | 4.87091700 | 1.41880000  | 1.12738000  |
| H | 4.70929600 | -0.33715400 | -0.08779900 |
| C | 4.83699200 | 1.82206800  | -1.81971500 |
| H | 2.91369300 | 2.02575500  | -0.83628700 |
| H | 3.08064300 | 0.52820000  | -1.74547600 |
| C | 6.08444100 | 2.00836200  | 0.38006500  |
| H | 4.23420200 | 2.24422200  | 1.47633700  |
| H | 5.20453400 | 0.85988800  | 2.01341600  |
| C | 5.64472400 | 2.75060700  | -0.89585300 |
| H | 4.49856300 | 2.36842200  | -2.71008000 |
| H | 5.48756100 | 0.99883000  | -2.16197300 |
| H | 6.63599000 | 2.68474800  | 1.04988100  |
| H | 6.77054600 | 1.18994000  | 0.10598500  |
| H | 6.52289600 | 3.14873900  | -1.42549600 |
| H | 5.01515100 | 3.61065400  | -0.61774400 |
| C | 2.06676000 | 0.79817400  | 2.41516300  |

|    |             |             |             |
|----|-------------|-------------|-------------|
| C  | 1.41876300  | 2.06352700  | 1.80511300  |
| C  | 1.06960500  | 0.09381700  | 3.35903300  |
| H  | 2.95832300  | 1.10553400  | 2.98052100  |
| C  | 0.99520700  | 3.03006700  | 2.92809500  |
| H  | 0.53916100  | 1.76034900  | 1.21718000  |
| H  | 2.11025300  | 2.56284800  | 1.11451500  |
| C  | 0.64206200  | 1.05097200  | 4.48796300  |
| H  | 0.18803900  | -0.20497400 | 2.77646100  |
| H  | 1.51263800  | -0.81754800 | 3.78154800  |
| C  | 0.03719100  | 2.34911400  | 3.92351100  |
| H  | 0.51962200  | 3.91966400  | 2.49213200  |
| H  | 1.89862300  | 3.37166200  | 3.46220800  |
| H  | -0.08938800 | 0.54799300  | 5.13644000  |
| H  | 1.52178000  | 1.29140000  | 5.10971700  |
| H  | -0.21304600 | 3.04066300  | 4.74154800  |
| H  | -0.90239100 | 2.10329300  | 3.41316000  |
| Au | 0.82703500  | -0.74953500 | -0.39789600 |
| N  | -3.38880100 | 1.05456700  | 0.65112000  |
| S  | -3.14080800 | 0.20194900  | 2.02311300  |
| S  | -4.14536100 | 2.50162200  | 0.55898200  |
| O  | -3.28988800 | 0.92144700  | 3.29612900  |
| O  | -1.96375500 | -0.65522400 | 1.81358300  |
| O  | -4.68573300 | 2.60688400  | -0.80860800 |
| O  | -4.96842400 | 2.92068700  | 1.70055500  |
| C  | -4.60993100 | -1.03212600 | 1.93811700  |
| C  | -2.64283600 | 3.69046100  | 0.53799900  |
| F  | -5.77823100 | -0.37810400 | 1.79335200  |
| F  | -4.45543300 | -1.86305400 | 0.88287700  |
| F  | -4.65672600 | -1.76982800 | 3.06051200  |
| F  | -1.81150800 | 3.36680800  | -0.47424200 |

|   |             |            |            |
|---|-------------|------------|------------|
| F | -3.05904500 | 4.95730700 | 0.36620000 |
| F | -1.95947200 | 3.61068400 | 1.69439500 |

**TS8**

0 1

|   |             |             |             |
|---|-------------|-------------|-------------|
| C | 0.77035300  | 5.87783400  | -1.75458500 |
| C | 0.32142000  | 4.56393600  | -1.59890200 |
| C | 0.57688400  | 3.59637900  | -2.60023700 |
| C | 1.29262100  | 3.98582800  | -3.75658000 |
| C | 1.73330900  | 5.30399400  | -3.90526900 |
| C | 1.47782700  | 6.25425000  | -2.90608200 |
| H | 0.56630000  | 6.61139000  | -0.97558500 |
| H | -0.23525400 | 4.27162700  | -0.71058600 |
| H | 1.49421500  | 3.24548600  | -4.52847000 |
| H | 2.28301700  | 5.58881200  | -4.80154000 |
| H | 1.82559400  | 7.27959700  | -3.02353500 |
| C | 0.13407700  | 2.25334000  | -2.43105100 |
| C | -0.24312100 | 1.10788600  | -2.26185300 |
| C | -0.69859400 | -0.24024500 | -1.98935500 |
| O | -2.38535200 | -2.62817800 | -0.01456600 |
| C | -2.43267400 | -2.14486300 | 1.34497300  |
| H | -1.43849800 | -1.78306100 | 1.64389600  |
| H | -3.18036000 | -1.35653500 | 1.46669200  |
| H | -2.71058000 | -3.00778800 | 1.95781700  |
| C | 0.37689700  | -1.27368400 | -1.54208200 |
| C | -0.20074700 | -2.49261300 | -1.73918200 |
| C | 0.28651900  | -3.81932700 | -1.33366900 |
| C | 0.00398500  | -4.94956500 | -2.13160300 |
| C | 1.03845200  | -4.01588000 | -0.15570500 |
| C | 0.48003500  | -6.21908900 | -1.78618200 |

|   |             |             |             |
|---|-------------|-------------|-------------|
| H | -0.57807600 | -4.82221100 | -3.04386200 |
| C | 1.51179200  | -5.28405500 | 0.19354500  |
| H | 1.24163900  | -3.16471400 | 0.48902400  |
| C | 1.24034200  | -6.39327300 | -0.62105100 |
| H | 0.25760900  | -7.07318100 | -2.42567600 |
| H | 2.08579700  | -5.41027100 | 1.11168600  |
| H | 1.60650800  | -7.38179700 | -0.34587600 |
| C | -1.44908000 | -1.00034900 | -3.12047000 |
| H | -0.81100300 | -1.16204200 | -3.99616400 |
| H | -2.38964200 | -0.51291700 | -3.40579800 |
| C | -1.62673700 | -2.27472200 | -2.27780700 |
| H | -2.11737000 | -3.14227100 | -2.72620100 |
| C | -2.37621500 | -1.70755000 | -1.02849700 |
| C | -1.75112800 | -0.30335200 | -0.82119700 |
| H | -2.49211400 | 0.48519100  | -0.94737000 |
| H | -1.25529900 | -0.19218700 | 0.14487200  |
| C | 5.39056000  | -1.56566400 | 1.02296100  |
| C | 4.76778200  | -0.55806500 | 1.80813700  |
| C | 5.21079200  | -0.34766300 | 3.12922600  |
| C | 6.23741200  | -1.12038000 | 3.68128200  |
| C | 6.83330100  | -2.13028600 | 2.91630700  |
| C | 6.40867700  | -2.34676300 | 1.60166700  |
| C | 4.98259800  | -1.84150500 | -0.38403800 |
| C | 4.32392000  | -3.04410200 | -0.69605600 |
| C | 3.83443200  | -3.27308200 | -1.98657400 |
| C | 4.00930100  | -2.30721300 | -2.98418300 |
| C | 4.68950700  | -1.11799000 | -2.69123200 |
| C | 5.17563500  | -0.88668300 | -1.39963200 |
| H | 4.73820000  | 0.41557200  | 3.74306400  |
| H | 6.56142200  | -0.93893900 | 4.70516800  |

|   |            |             |             |
|---|------------|-------------|-------------|
| H | 7.62745800 | -2.74435500 | 3.33888000  |
| H | 6.87457200 | -3.12364100 | 0.99699800  |
| H | 4.14892200 | -3.77614900 | 0.08925900  |
| H | 3.28518800 | -4.18813800 | -2.19689500 |
| H | 3.60595400 | -2.47429900 | -3.98160100 |
| H | 4.82834600 | -0.36263500 | -3.46356100 |
| H | 5.69413700 | 0.04232700  | -1.17147700 |
| P | 3.34785100 | 0.41935100  | 1.14921000  |
| C | 4.12271100 | 2.00698100  | 0.53573700  |
| C | 3.25660200 | 2.67519400  | -0.55334800 |
| C | 4.49654300 | 2.98657700  | 1.66708700  |
| H | 5.05700300 | 1.66928100  | 0.06284600  |
| C | 3.95168700 | 3.93396800  | -1.10167800 |
| H | 2.28049200 | 2.95398200  | -0.13619200 |
| H | 3.05435500 | 1.95765800  | -1.35896800 |
| C | 5.18248400 | 4.24422900  | 1.09556500  |
| H | 3.58415200 | 3.29201600  | 2.20039800  |
| H | 5.15614900 | 2.49154000  | 2.39418700  |
| C | 4.30100300 | 4.91878800  | 0.02824000  |
| H | 3.30354300 | 4.41464800  | -1.84340100 |
| H | 4.88014900 | 3.63484500  | -1.61729100 |
| H | 5.40835700 | 4.94538200  | 1.91270900  |
| H | 6.14359500 | 3.95392100  | 0.64019600  |
| H | 4.80717000 | 5.80561000  | -0.38084800 |
| H | 3.36709400 | 5.26755000  | 0.49978500  |
| C | 2.29241100 | 0.83076500  | 2.63423400  |
| C | 1.11417200 | 1.74174400  | 2.21069800  |
| C | 1.76677800 | -0.48921100 | 3.24539000  |
| H | 2.89811800 | 1.36642300  | 3.37915200  |
| C | 0.15030000 | 1.99248900  | 3.38681600  |

|    |             |             |             |
|----|-------------|-------------|-------------|
| H  | 0.56854600  | 1.25797400  | 1.38670500  |
| H  | 1.49155500  | 2.69693500  | 1.82606200  |
| C  | 0.80961200  | -0.22285500 | 4.42106700  |
| H  | 1.22798800  | -1.04110000 | 2.45845300  |
| H  | 2.60531100  | -1.12078000 | 3.56686200  |
| C  | -0.36488000 | 0.67107200  | 3.98434600  |
| H  | -0.68909300 | 2.61384200  | 3.04391900  |
| H  | 0.67534400  | 2.56178900  | 4.17186400  |
| H  | 0.43843600  | -1.17985200 | 4.81629200  |
| H  | 1.36173100  | 0.27348200  | 5.23621700  |
| H  | -1.03480600 | 0.87125200  | 4.83287800  |
| H  | -0.95574400 | 0.13779800  | 3.22341300  |
| Au | 1.92727400  | -0.60560300 | -0.38565400 |
| N  | -5.09400300 | 0.16646500  | 0.07807500  |
| S  | -6.07618800 | -0.51991100 | 1.24692800  |
| S  | -4.87720700 | 1.82527000  | -0.07728800 |
| O  | -6.16845100 | 0.28583600  | 2.46497700  |
| O  | -5.71050000 | -1.93996600 | 1.27671400  |
| O  | -4.25810000 | 2.02154500  | -1.39029700 |
| O  | -6.04268400 | 2.59631100  | 0.34793700  |
| C  | -7.82100700 | -0.49862300 | 0.42809900  |
| C  | -3.47030300 | 2.21422700  | 1.24767000  |
| F  | -8.30775700 | 0.73894800  | 0.35024900  |
| F  | -7.73664700 | -1.02414900 | -0.80814800 |
| F  | -8.63661900 | -1.25763500 | 1.17477700  |
| F  | -2.36398100 | 2.62688300  | 0.60810800  |
| F  | -3.88854800 | 3.17686800  | 2.07113400  |
| F  | -3.17171500 | 1.11834300  | 1.96503700  |
| C  | -4.68094100 | -2.54447300 | -1.75526400 |
| H  | -5.70114200 | -2.16127000 | -1.83738500 |



|   |             |             |             |
|---|-------------|-------------|-------------|
| H | -4.35163100 | -2.94367400 | -2.71982800 |
| H | -4.61183600 | -3.29906100 | -0.96593000 |
| O | -3.84808100 | -1.39548500 | -1.42710700 |
| H | -4.41270700 | -0.65364300 | -0.69726700 |

**TS8'**

0 1

|   |             |             |             |
|---|-------------|-------------|-------------|
| C | 4.01485600  | 5.89418700  | 0.78733800  |
| C | 3.01900200  | 4.91487700  | 0.81878500  |
| C | 2.28845200  | 4.59813700  | -0.35172400 |
| C | 2.58935700  | 5.28743300  | -1.54980500 |
| C | 3.58677000  | 6.26648700  | -1.57087100 |
| C | 4.30251700  | 6.57483200  | -0.40499000 |
| H | 4.57021700  | 6.12605100  | 1.69529700  |
| H | 2.79518700  | 4.38445100  | 1.74255600  |
| H | 2.03324400  | 5.04642600  | -2.45384700 |
| H | 3.80674800  | 6.78961800  | -2.50058000 |
| H | 5.08000000  | 7.33711800  | -0.42561600 |
| C | 1.27356000  | 3.59802000  | -0.31516600 |
| C | 0.41125900  | 2.73916200  | -0.26342100 |
| C | -0.58438300 | 1.69477100  | -0.13010100 |
| O | -2.86827600 | -0.20174600 | 1.78335100  |
| C | -2.75308000 | 0.00021400  | 3.21527600  |
| H | -1.69411700 | 0.03938400  | 3.50495600  |
| H | -3.27167600 | 0.91836300  | 3.51634700  |
| H | -3.23667500 | -0.86867000 | 3.66741900  |
| C | -0.07669100 | 0.22521800  | -0.29416400 |
| C | -1.20002200 | -0.51705600 | -0.50905200 |
| C | -1.33588000 | -1.97382700 | -0.61914500 |
| C | -2.32406400 | -2.53431700 | -1.45628400 |

|   |             |             |             |
|---|-------------|-------------|-------------|
| C | -0.48524300 | -2.85305400 | 0.08412700  |
| C | -2.43854300 | -3.91925300 | -1.61135800 |
| H | -3.00103200 | -1.87804400 | -1.99982400 |
| C | -0.59470900 | -4.23738400 | -0.07397600 |
| H | 0.25547600  | -2.43797300 | 0.76351100  |
| C | -1.56844000 | -4.77923700 | -0.92638200 |
| H | -3.21012100 | -4.32589600 | -2.26429500 |
| H | 0.07353700  | -4.89709400 | 0.47961700  |
| H | -1.65874100 | -5.85868700 | -1.04246400 |
| C | -1.79743300 | 1.70050400  | -1.10788300 |
| H | -1.49077400 | 1.55506000  | -2.14823800 |
| H | -2.40874100 | 2.61212600  | -1.03621000 |
| C | -2.41911200 | 0.42291700  | -0.50733300 |
| H | -3.35105300 | 0.04332900  | -0.92595400 |
| C | -2.53485300 | 0.81200300  | 0.98013700  |
| C | -1.32412800 | 1.72678500  | 1.26536500  |
| H | -1.63575000 | 2.74179400  | 1.53706100  |
| H | -0.68536100 | 1.32627600  | 2.05771600  |
| C | 4.32664800  | -2.89305400 | -1.57878200 |
| C | 4.84158200  | -2.32320200 | -0.38399000 |
| C | 5.87764300  | -2.98763700 | 0.30252600  |
| C | 6.39273500  | -4.20208600 | -0.16167800 |
| C | 5.86436700  | -4.77947100 | -1.32254700 |
| C | 4.84189400  | -4.12783000 | -2.01808600 |
| C | 3.24963700  | -2.24231500 | -2.37640500 |
| C | 1.98576800  | -2.85151900 | -2.47332600 |
| C | 0.93785500  | -2.21039300 | -3.14202900 |
| C | 1.14477700  | -0.95900100 | -3.73421400 |
| C | 2.40770200  | -0.35651000 | -3.66846400 |
| C | 3.45564000  | -0.99568000 | -2.99667900 |

|   |             |             |             |
|---|-------------|-------------|-------------|
| H | 6.27655400  | -2.56391800 | 1.22120400  |
| H | 7.19386600  | -4.69663700 | 0.38581800  |
| H | 6.24933100  | -5.73033200 | -1.68866200 |
| H | 4.43637600  | -4.56584000 | -2.92893500 |
| H | 1.81264700  | -3.80563200 | -1.98025700 |
| H | -0.04485000 | -2.67550700 | -3.16857900 |
| H | 0.32234300  | -0.45062900 | -4.23506700 |
| H | 2.57518700  | 0.61635000  | -4.12879300 |
| H | 4.43334300  | -0.52231400 | -2.93575800 |
| P | 4.13537900  | -0.76964700 | 0.32121200  |
| C | 5.31067800  | 0.56877200  | -0.25001100 |
| C | 4.61433800  | 1.94392200  | -0.32712700 |
| C | 6.62399400  | 0.63164300  | 0.55573300  |
| H | 5.56261400  | 0.26646600  | -1.27758100 |
| C | 5.56953000  | 2.99403500  | -0.91910500 |
| H | 4.30425800  | 2.26053400  | 0.67817700  |
| H | 3.69820000  | 1.86649800  | -0.92623600 |
| C | 7.56712400  | 1.70358600  | -0.02999100 |
| H | 6.39694300  | 0.88479100  | 1.60192400  |
| H | 7.11818500  | -0.35023500 | 0.55203200  |
| C | 6.87494900  | 3.07794500  | -0.10790500 |
| H | 5.07002400  | 3.96900700  | -0.94823300 |
| H | 5.80838000  | 2.71355400  | -1.95883300 |
| H | 8.48191200  | 1.76384600  | 0.57815200  |
| H | 7.86999600  | 1.39537400  | -1.04420200 |
| H | 7.55433600  | 3.82095700  | -0.55099000 |
| H | 6.63935000  | 3.42239600  | 0.91303900  |
| C | 4.30925600  | -0.94649200 | 2.16878700  |
| C | 3.82499700  | 0.34535500  | 2.86908300  |
| C | 3.47204700  | -2.16188800 | 2.63194600  |

|    |             |             |             |
|----|-------------|-------------|-------------|
| H  | 5.36550900  | -1.10793600 | 2.42679400  |
| C  | 3.85342000  | 0.18876600  | 4.40159900  |
| H  | 2.79497200  | 0.55785100  | 2.54238900  |
| H  | 4.44347600  | 1.19968600  | 2.56616000  |
| C  | 3.50046700  | -2.30852100 | 4.16421700  |
| H  | 2.43244100  | -2.00955600 | 2.30001000  |
| H  | 3.83428200  | -3.08052600 | 2.15191400  |
| C  | 3.01559200  | -1.02057700 | 4.85381400  |
| H  | 3.48222700  | 1.11175600  | 4.87097100  |
| H  | 4.89578700  | 0.05155300  | 4.73420300  |
| H  | 2.87713300  | -3.16371400 | 4.46342500  |
| H  | 4.53118800  | -2.52742500 | 4.48990300  |
| H  | 3.06060600  | -1.13030300 | 5.94712600  |
| H  | 1.96021500  | -0.84641600 | 4.58538200  |
| Au | 1.88955700  | -0.29950800 | -0.09374400 |
| N  | -5.87091200 | 0.43355700  | 0.33484300  |
| S  | -6.42761400 | 1.10555500  | -1.07085300 |
| S  | -6.61393100 | -0.78986600 | 1.18476000  |
| O  | -7.21651300 | 0.22741500  | -1.93427600 |
| O  | -5.27552600 | 1.86322200  | -1.59561200 |
| O  | -6.11684900 | -0.68943100 | 2.56140300  |
| O  | -8.04132900 | -0.93931500 | 0.89458900  |
| C  | -7.61177000 | 2.47905800  | -0.43700400 |
| C  | -5.76562000 | -2.35767400 | 0.44618600  |
| F  | -8.65338900 | 1.95969900  | 0.21783100  |
| F  | -6.92595600 | 3.29085000  | 0.39317700  |
| F  | -8.05181000 | 3.19366000  | -1.48448400 |
| F  | -4.51404000 | -2.46232500 | 0.90209100  |
| F  | -6.46683400 | -3.43941400 | 0.82357700  |
| F  | -5.74527200 | -2.29241600 | -0.89515800 |

|          |             |             |             |
|----------|-------------|-------------|-------------|
| O        | -3.89714800 | 1.83662400  | 1.11559900  |
| H        | -4.73829700 | 1.19833100  | 0.87655100  |
| H        | -3.87929600 | 2.46569300  | 0.37141000  |
| <b>G</b> |             |             |             |
| 01       |             |             |             |
| C        | -0.72172500 | 5.69984900  | -2.03653800 |
| C        | -0.86334500 | 4.30967800  | -2.00295200 |
| C        | -0.69246800 | 3.60159500  | -0.78985500 |
| C        | -0.38343800 | 4.32780600  | 0.38479600  |
| C        | -0.24277900 | 5.71703100  | 0.34117800  |
| C        | -0.40881200 | 6.40907100  | -0.86769900 |
| H        | -0.85370900 | 6.23148500  | -2.97821500 |
| H        | -1.10321700 | 3.75578100  | -2.90866400 |
| H        | -0.25489100 | 3.78809400  | 1.32101900  |
| H        | -0.00215800 | 6.26263100  | 1.25283700  |
| H        | -0.29603700 | 7.49181700  | -0.89812200 |
| C        | -0.81705100 | 2.18395800  | -0.75273500 |
| C        | -0.92548200 | 0.97102300  | -0.73281500 |
| C        | -1.08828200 | -0.46592800 | -0.64741000 |
| O        | -2.16491800 | -3.37381500 | 1.07847400  |
| C        | -2.70060200 | -3.19945700 | 2.40210200  |
| H        | -2.25994300 | -2.32216600 | 2.90008800  |
| H        | -3.79410200 | -3.08845100 | 2.37765800  |
| H        | -2.43014900 | -4.10555800 | 2.95574700  |
| C        | 0.21400700  | -1.32070900 | -0.56605200 |
| C        | -0.18765300 | -2.59368100 | -0.84511000 |
| C        | 0.61487500  | -3.82013300 | -0.79920800 |
| C        | 0.37882500  | -4.87196900 | -1.71181400 |
| C        | 1.67053900  | -3.97455700 | 0.12574300  |

|   |             |             |             |
|---|-------------|-------------|-------------|
| C | 1.19424000  | -6.00893100 | -1.73244900 |
| H | -0.43243300 | -4.78055300 | -2.43309300 |
| C | 2.48476000  | -5.10996300 | 0.10740200  |
| H | 1.84265400  | -3.19031600 | 0.85908500  |
| C | 2.25906200  | -6.13109600 | -0.82789400 |
| H | 1.00222200  | -6.79885600 | -2.45854800 |
| H | 3.29499400  | -5.20237900 | 0.83089700  |
| H | 2.89394500  | -7.01638500 | -0.84193500 |
| C | -1.84095700 | -1.18511400 | -1.80911300 |
| H | -1.29999600 | -1.09624100 | -2.75763000 |
| H | -2.87934700 | -0.85656900 | -1.92736600 |
| C | -1.68796600 | -2.57836200 | -1.16363900 |
| H | -2.07498600 | -3.44469100 | -1.70542500 |
| C | -2.42712900 | -2.32769200 | 0.19250800  |
| C | -1.94258600 | -0.90705700 | 0.60423300  |
| H | -2.77349600 | -0.22210400 | 0.78809900  |
| H | -1.31310900 | -0.94103700 | 1.49815200  |
| C | 5.80168300  | -0.94283900 | -0.78843200 |
| C | 5.57734000  | -0.10105400 | 0.33337300  |
| C | 6.62914400  | 0.11829700  | 1.24521400  |
| C | 7.87666900  | -0.49054700 | 1.07432500  |
| C | 8.08915600  | -1.34182900 | -0.01646800 |
| C | 7.05814200  | -1.56138000 | -0.93489700 |
| C | 4.74305600  | -1.22328600 | -1.79893300 |
| C | 4.19684700  | -2.51559900 | -1.88807100 |
| C | 3.13340100  | -2.78054900 | -2.75648800 |
| C | 2.60901800  | -1.75766300 | -3.55477300 |
| C | 3.16715900  | -0.47383600 | -3.49816300 |
| C | 4.23061500  | -0.20811700 | -2.62842500 |
| H | 6.47250300  | 0.75776200  | 2.11050100  |

|   |            |             |             |
|---|------------|-------------|-------------|
| H | 8.67260500 | -0.30595300 | 1.79454700  |
| H | 9.05355200 | -1.82899000 | -0.15467000 |
| H | 7.21915300 | -2.21295800 | -1.79269100 |
| H | 4.57379400 | -3.30067500 | -1.23621300 |
| H | 2.69248000 | -3.77422800 | -2.77575400 |
| H | 1.76005600 | -1.95640100 | -4.20700400 |
| H | 2.76347200 | 0.32670800  | -4.11669800 |
| H | 4.65559900 | 0.79228700  | -2.58019000 |
| P | 3.92098500 | 0.65765000  | 0.63892300  |
| C | 4.07639200 | 2.37421500  | -0.09156600 |
| C | 2.70032300 | 2.94996700  | -0.48625000 |
| C | 4.88676100 | 3.34783600  | 0.78833900  |
| H | 4.64862000 | 2.20622000  | -1.01551800 |
| C | 2.85726100 | 4.32218500  | -1.16472100 |
| H | 2.07198100 | 3.05907800  | 0.40675700  |
| H | 2.17776900 | 2.24593000  | -1.14609000 |
| C | 5.02715000 | 4.71759400  | 0.09258800  |
| H | 4.37159100 | 3.48561500  | 1.75033400  |
| H | 5.87976900 | 2.92709500  | 1.00247000  |
| C | 3.64905900 | 5.29795600  | -0.27588100 |
| H | 1.86592900 | 4.73059000  | -1.39570000 |
| H | 3.39234300 | 4.19122900  | -2.12056700 |
| H | 5.57763200 | 5.41056400  | 0.74631800  |
| H | 5.62397400 | 4.59206600  | -0.82595000 |
| H | 3.76629700 | 6.26718900  | -0.78278700 |
| H | 3.07697100 | 5.48316600  | 0.64841400  |
| C | 3.78954900 | 0.83761600  | 2.49049500  |
| C | 2.48183300 | 1.57916800  | 2.85581300  |
| C | 3.81160800 | -0.57029300 | 3.12908000  |
| H | 4.63777200 | 1.42613900  | 2.86824900  |

|    |             |             |             |
|----|-------------|-------------|-------------|
| C  | 2.29375200  | 1.64827500  | 4.38378900  |
| H  | 1.63227700  | 1.04454900  | 2.40384300  |
| H  | 2.48826700  | 2.59146300  | 2.43368200  |
| C  | 3.62290100  | -0.49187900 | 4.65523600  |
| H  | 2.99020900  | -1.15916500 | 2.69043000  |
| H  | 4.74928600  | -1.08635000 | 2.88363900  |
| C  | 2.32014600  | 0.24470500  | 5.01478800  |
| H  | 1.34486500  | 2.15535400  | 4.61237000  |
| H  | 3.10219600  | 2.25746900  | 4.82192200  |
| H  | 3.62003000  | -1.50675800 | 5.07919000  |
| H  | 4.47784300  | 0.04431100  | 5.10038200  |
| H  | 2.20738500  | 0.31439100  | 6.10672400  |
| H  | 1.46403200  | -0.33565100 | 4.63333200  |
| Au | 2.01582700  | -0.49244000 | -0.06242700 |
| N  | -5.31112400 | -0.01837100 | 0.04191700  |
| S  | -5.95104000 | 0.53350400  | -1.43400100 |
| S  | -5.79423000 | 0.41443900  | 1.60921700  |
| O  | -7.29025600 | 1.07882000  | -1.25586100 |
| O  | -5.63155900 | -0.50837300 | -2.40886900 |
| O  | -4.68852300 | 0.05627800  | 2.49288800  |
| O  | -6.42701600 | 1.72575300  | 1.60300600  |
| C  | -4.78321400 | 2.03339500  | -1.81084100 |
| C  | -7.16429900 | -0.89642900 | 1.93957700  |
| F  | -5.40091200 | 2.81567300  | -2.70280700 |
| F  | -4.54385300 | 2.71865500  | -0.69282400 |
| F  | -3.63903300 | 1.57915800  | -2.32560600 |
| F  | -7.64651000 | -0.71232300 | 3.17230500  |
| F  | -8.14393800 | -0.77359300 | 1.04219800  |
| F  | -6.62183400 | -2.12224900 | 1.84590600  |
| C  | -4.53549700 | -3.36303900 | -0.58764800 |



|           |             |             |             |
|-----------|-------------|-------------|-------------|
| H         | -5.60757800 | -3.22843100 | -0.40901400 |
| H         | -4.34806100 | -3.41839600 | -1.66864500 |
| H         | -4.18789500 | -4.27993900 | -0.09520800 |
| O         | -3.88057700 | -2.21696900 | -0.00868900 |
| H         | -4.68029400 | -0.89114700 | -0.01652700 |
| <b>G'</b> |             |             |             |
| 0 1       |             |             |             |
| C         | -0.87521600 | 5.64892000  | -2.01082100 |
| C         | -0.99998800 | 4.25697900  | -1.98379900 |
| C         | -0.82153800 | 3.54551100  | -0.77380800 |
| C         | -0.52278000 | 4.26999400  | 0.40453800  |
| C         | -0.39857100 | 5.66094800  | 0.36741700  |
| C         | -0.57177300 | 6.35644000  | -0.83846000 |
| H         | -1.01270000 | 6.18325200  | -2.95017100 |
| H         | -1.23215100 | 3.70440400  | -2.89233700 |
| H         | -0.38900400 | 3.72770200  | 1.33850500  |
| H         | -0.16518700 | 6.20515700  | 1.28177900  |
| H         | -0.47190200 | 7.44058000  | -0.86384000 |
| C         | -0.92730700 | 2.12608500  | -0.74355200 |
| C         | -1.01502500 | 0.91142800  | -0.72945800 |
| C         | -1.14775400 | -0.52920200 | -0.65298800 |
| O         | -2.10445600 | -3.47881600 | 1.05964900  |
| C         | -2.60183800 | -3.33184500 | 2.40168700  |
| H         | -2.16339300 | -2.45211200 | 2.89797500  |
| H         | -3.69767900 | -3.24511800 | 2.41074100  |
| H         | -2.29588600 | -4.23900100 | 2.93467800  |
| C         | 0.17440000  | -1.35561500 | -0.59371500 |
| C         | -0.19779600 | -2.63396800 | -0.88865300 |
| C         | 0.63289100  | -3.84219300 | -0.86237600 |

|   |             |             |             |
|---|-------------|-------------|-------------|
| C | 0.42258400  | -4.88158700 | -1.79510300 |
| C | 1.68848000  | -3.99004100 | 0.06332300  |
| C | 1.26241100  | -6.00009400 | -1.83337000 |
| H | -0.38798100 | -4.79375500 | -2.51784900 |
| C | 2.52738200  | -5.10695500 | 0.02725600  |
| H | 1.84079900  | -3.21543100 | 0.81106400  |
| C | 2.32660200  | -6.11548300 | -0.92713600 |
| H | 1.09043500  | -6.78046200 | -2.57462700 |
| H | 3.33721900  | -5.19506600 | 0.75169000  |
| H | 2.98103900  | -6.98606700 | -0.95533100 |
| C | -1.89745100 | -1.25474100 | -1.81170400 |
| H | -1.37142900 | -1.14455400 | -2.76628900 |
| H | -2.94438500 | -0.95069500 | -1.91508600 |
| C | -1.70314900 | -2.64954700 | -1.18080700 |
| H | -2.09135400 | -3.52191100 | -1.71893400 |
| C | -2.42053600 | -2.43335700 | 0.19180800  |
| C | -1.98103300 | -0.99867100 | 0.60383100  |
| H | -2.83558000 | -0.34298400 | 0.78692500  |
| H | -1.34761100 | -1.00794500 | 1.49512200  |
| C | 5.76723000  | -0.85844300 | -0.76549600 |
| C | 5.50780000  | -0.04339800 | 0.36844700  |
| C | 6.54150200  | 0.18321200  | 1.29897000  |
| C | 7.80585000  | -0.39139600 | 1.13323700  |
| C | 8.05499000  | -1.21259100 | 0.02727600  |
| C | 7.04122200  | -1.44078200 | -0.90818200 |
| C | 4.72494200  | -1.15543900 | -1.78871100 |
| C | 4.20971800  | -2.45959600 | -1.88950500 |
| C | 3.16176400  | -2.74529900 | -2.77009200 |
| C | 2.62184800  | -1.73109200 | -3.56899400 |
| C | 3.14896800  | -0.43482700 | -3.50014600 |

|   |            |             |             |
|---|------------|-------------|-------------|
| C | 4.19721100 | -0.14864100 | -2.61841400 |
| H | 6.35765600 | 0.80089300  | 2.17464200  |
| H | 8.58719600 | -0.20242600 | 1.86815600  |
| H | 9.03345200 | -1.67160300 | -0.10815900 |
| H | 7.22925500 | -2.07183300 | -1.77576200 |
| H | 4.59839100 | -3.23915500 | -1.23787100 |
| H | 2.74534800 | -3.74917600 | -2.79964000 |
| H | 1.78448200 | -1.94634900 | -4.23091300 |
| H | 2.73308200 | 0.35896300  | -4.11927300 |
| H | 4.59861600 | 0.86090600  | -2.56119200 |
| P | 3.83354800 | 0.68115900  | 0.65665400  |
| C | 3.96780900 | 2.40345100  | -0.06502000 |
| C | 2.58659100 | 2.95843100  | -0.47127200 |
| C | 4.75347500 | 3.38594700  | 0.82734000  |
| H | 4.55190900 | 2.24961100  | -0.98400800 |
| C | 2.72735800 | 4.33704000  | -1.14036100 |
| H | 1.94637500 | 3.05121700  | 0.41497600  |
| H | 2.08392500 | 2.24979000  | -1.14149700 |
| C | 4.87869400 | 4.76097700  | 0.13924700  |
| H | 4.22660500 | 3.51114900  | 1.78468100  |
| H | 5.75097600 | 2.98048600  | 1.04987700  |
| C | 3.49504300 | 5.32110800  | -0.23952300 |
| H | 1.73156200 | 4.73051400  | -1.37834100 |
| H | 3.27323000 | 4.22025500  | -2.09196400 |
| H | 5.41200400 | 5.45950500  | 0.80124800  |
| H | 5.48598200 | 4.64918200  | -0.77419800 |
| H | 3.60161800 | 6.29430300  | -0.74116500 |
| H | 2.91161200 | 5.49350900  | 0.68018200  |
| C | 3.67385600 | 0.85238600  | 2.50685100  |
| C | 2.34967300 | 1.57303800  | 2.85516900  |

|    |             |             |             |
|----|-------------|-------------|-------------|
| C  | 3.71037900  | -0.55772500 | 3.14029500  |
| H  | 4.50710700  | 1.45337000  | 2.89792000  |
| C  | 2.13266000  | 1.62771800  | 4.37979400  |
| H  | 1.51503100  | 1.03192900  | 2.38369900  |
| H  | 2.35093300  | 2.58895200  | 2.44179500  |
| C  | 3.49110000  | -0.49143400 | 4.66293700  |
| H  | 2.90961700  | -1.16103700 | 2.68348500  |
| H  | 4.66252500  | -1.05411300 | 2.91054800  |
| C  | 2.16896800  | 0.22020100  | 5.00114800  |
| H  | 1.17221900  | 2.11890400  | 4.59432600  |
| H  | 2.92361300  | 2.24546000  | 4.83742700  |
| H  | 3.49804900  | -1.50878800 | 5.08085200  |
| H  | 4.32749800  | 0.05712600  | 5.12781700  |
| H  | 2.03283200  | 0.27990700  | 6.09100200  |
| H  | 1.33061300  | -0.37142200 | 4.59812600  |
| Au | 1.95846500  | -0.49880100 | -0.07396400 |
| N  | -5.38260000 | -0.19333100 | 0.00348600  |
| S  | -6.02318600 | 0.36916700  | -1.47089800 |
| S  | -5.87651900 | 0.21186100  | 1.57864000  |
| O  | -7.36784400 | 0.89822000  | -1.28841800 |
| O  | -5.68770700 | -0.65818600 | -2.45550500 |
| O  | -4.77295200 | -0.15828100 | 2.45966200  |
| O  | -6.50732300 | 1.52390100  | 1.58285700  |
| C  | -4.87231100 | 1.89003900  | -1.82250300 |
| C  | -7.24756400 | -1.10534700 | 1.88351100  |
| F  | -5.50983400 | 2.68909300  | -2.68470300 |
| F  | -4.62453100 | 2.54754100  | -0.69017200 |
| F  | -3.73139600 | 1.46090200  | -2.36503700 |
| F  | -7.70977900 | -0.95640100 | 3.12902300  |
| F  | -8.23970100 | -0.94549900 | 1.00636200  |

|   |             |             |             |
|---|-------------|-------------|-------------|
| F | -6.71149500 | -2.32658200 | 1.74158500  |
| O | -3.87620800 | -2.39682800 | 0.00031700  |
| H | -4.76831200 | -1.06180200 | -0.06355600 |
| H | -4.13477700 | -3.19430800 | -0.48485900 |

**TS9**

0 1

|   |             |             |            |
|---|-------------|-------------|------------|
| C | 2.78284800  | 5.68848600  | 0.99462000 |
| C | 1.75653900  | 4.76797300  | 1.22497400 |
| C | 2.02183200  | 3.55545700  | 1.90184400 |
| C | 3.34141100  | 3.30011200  | 2.34799700 |
| C | 4.36113200  | 4.22505600  | 2.11040100 |
| C | 4.08832500  | 5.42131100  | 1.43059500 |
| H | 2.56286300  | 6.61492300  | 0.46539300 |
| H | 0.74747600  | 4.97218000  | 0.88113900 |
| H | 3.55181700  | 2.36859600  | 2.86957000 |
| H | 5.37256600  | 4.01182100  | 2.45466600 |
| H | 4.88631200  | 6.13832400  | 1.24304400 |
| C | 1.00205400  | 2.58069000  | 2.10136700 |
| C | 0.16618100  | 1.70651500  | 2.24692600 |
| C | -0.71471800 | 0.57215900  | 2.44149300 |
| O | -1.26374400 | -2.73853800 | 3.49554800 |
| C | -0.14661100 | -3.46569500 | 4.02097000 |
| H | 0.77919300  | -3.20591000 | 3.48642000 |
| H | -0.01126500 | -3.27745800 | 5.09688800 |
| H | -0.36712300 | -4.52755700 | 3.85775100 |
| C | -1.14306700 | -0.20705500 | 1.13896200 |
| C | -2.17476400 | -1.02139200 | 1.57889900 |
| C | -2.86664700 | -2.09326300 | 0.86246300 |
| C | -4.24707400 | -2.30750600 | 1.07545700 |

|   |             |             |             |
|---|-------------|-------------|-------------|
| C | -2.18845000 | -2.94297100 | -0.03525800 |
| C | -4.93291000 | -3.30497900 | 0.37950600  |
| H | -4.78743400 | -1.65302700 | 1.75371400  |
| C | -2.87250500 | -3.95106500 | -0.71909100 |
| H | -1.11708300 | -2.82802800 | -0.16978000 |
| C | -4.24820600 | -4.13244100 | -0.52243300 |
| H | -6.00280400 | -3.43505400 | 0.53726200  |
| H | -2.32771300 | -4.60181700 | -1.40208900 |
| H | -4.78048300 | -4.91746300 | -1.05863500 |
| C | -2.08651600 | 0.78698200  | 3.13542200  |
| H | -2.74772500 | 1.44208200  | 2.56465400  |
| H | -1.99065700 | 1.13388300  | 4.17126600  |
| C | -2.47970200 | -0.70185500 | 3.03246200  |
| H | -3.46365900 | -1.00771800 | 3.39131400  |
| C | -1.29453200 | -1.36103100 | 3.83540600  |
| C | -0.06771400 | -0.51987400 | 3.37928900  |
| H | 0.42090800  | -0.05657600 | 4.24267200  |
| H | 0.65809200  | -1.11780600 | 2.82346900  |
| C | 1.99282900  | -2.86197600 | -2.93967400 |
| C | 2.95790500  | -2.48767300 | -1.96724300 |
| C | 4.13205400  | -3.25846600 | -1.83886300 |
| C | 4.34847100  | -4.39310900 | -2.62588100 |
| C | 3.37763000  | -4.78713300 | -3.55420200 |
| C | 2.21725300  | -4.02417500 | -3.70566500 |
| C | 0.75739100  | -2.07841000 | -3.21171100 |
| C | -0.50590300 | -2.68547200 | -3.09316500 |
| C | -1.67014800 | -1.96494600 | -3.37492900 |
| C | -1.58948600 | -0.62809500 | -3.78364900 |
| C | -0.33719000 | -0.01630000 | -3.91046700 |
| C | 0.82708000  | -0.73614500 | -3.62806200 |

|   |             |             |             |
|---|-------------|-------------|-------------|
| H | 4.88521100  | -2.98673700 | -1.10439500 |
| H | 5.26533300  | -4.96829800 | -2.50473000 |
| H | 3.52800300  | -5.67643300 | -4.16485000 |
| H | 1.47021300  | -4.30865100 | -4.44514800 |
| H | -0.56954800 | -3.71884000 | -2.75665400 |
| H | -2.64007700 | -2.43909900 | -3.24724600 |
| H | -2.49386600 | -0.06042400 | -3.98814500 |
| H | -0.26842200 | 1.02378600  | -4.21910100 |
| H | 1.79688200  | -0.26114400 | -3.74935700 |
| P | 2.65832400  | -1.08791100 | -0.80309300 |
| C | 3.59962100  | 0.36477700  | -1.50672400 |
| C | 3.03860400  | 1.70202100  | -0.97866000 |
| C | 5.12766100  | 0.25842600  | -1.32248700 |
| H | 3.39571200  | 0.31515000  | -2.58593800 |
| C | 3.76787800  | 2.89369900  | -1.62448700 |
| H | 3.15741500  | 1.75553300  | 0.10899300  |
| H | 1.96435700  | 1.75755400  | -1.17713000 |
| C | 5.83051800  | 1.45913100  | -1.98949000 |
| H | 5.36999100  | 0.25805000  | -0.24963700 |
| H | 5.49843000  | -0.68451700 | -1.74907800 |
| C | 5.29251100  | 2.79261000  | -1.43791300 |
| H | 3.38832900  | 3.82664900  | -1.18740700 |
| H | 3.53638800  | 2.91450600  | -2.70304600 |
| H | 6.91697400  | 1.38490200  | -1.83229200 |
| H | 5.65442400  | 1.41811600  | -3.07713400 |
| H | 5.79502300  | 3.63822200  | -1.93049800 |
| H | 5.52509000  | 2.85899000  | -0.36301100 |
| C | 3.52827300  | -1.59558200 | 0.77228500  |
| C | 3.49838700  | -0.45431500 | 1.81267200  |
| C | 2.85493100  | -2.86577600 | 1.33797000  |

|    |             |             |             |
|----|-------------|-------------|-------------|
| H  | 4.58007000  | -1.81346600 | 0.54042000  |
| C  | 4.15928500  | -0.89933600 | 3.13249000  |
| H  | 2.45615500  | -0.16105200 | 1.99592400  |
| H  | 4.01679800  | 0.42978800  | 1.42622200  |
| C  | 3.51765200  | -3.30633300 | 2.65640200  |
| H  | 1.79182800  | -2.64201900 | 1.51730900  |
| H  | 2.89173800  | -3.67931100 | 0.60156900  |
| C  | 3.50478400  | -2.17158900 | 3.69669300  |
| H  | 4.09604600  | -0.08182500 | 3.86576400  |
| H  | 5.22992100  | -1.09170200 | 2.95065700  |
| H  | 2.99948900  | -4.19343200 | 3.04946900  |
| H  | 4.56061100  | -3.60270400 | 2.45592700  |
| H  | 4.01989400  | -2.48999300 | 4.61470000  |
| H  | 2.46444800  | -1.94334500 | 3.97121500  |
| Au | 0.47557500  | -0.63149800 | -0.14978900 |
| N  | -2.54823600 | 1.49506400  | -0.48384500 |
| S  | -1.76802200 | 2.51873900  | -1.56737200 |
| S  | -4.21752500 | 1.48836900  | -0.30240000 |
| O  | -2.48740700 | 2.64906400  | -2.83646200 |
| O  | -0.35280200 | 2.15954900  | -1.52560600 |
| O  | -4.49377300 | 0.84199800  | 0.98071200  |
| O  | -4.81686100 | 2.77721500  | -0.65109400 |
| C  | -1.85598700 | 4.26294900  | -0.71087000 |
| C  | -4.82696600 | 0.22462400  | -1.63298500 |
| F  | -2.94697100 | 4.93102200  | -1.08162900 |
| F  | -1.83627900 | 4.12777600  | 0.62274000  |
| F  | -0.76665300 | 4.95029600  | -1.10260400 |
| F  | -6.03819000 | -0.21507000 | -1.25546600 |
| F  | -4.92327400 | 0.81069600  | -2.83111500 |
| F  | -3.98280800 | -0.80800600 | -1.70855500 |



|   |             |             |            |
|---|-------------|-------------|------------|
| C | -2.58809800 | -1.75165700 | 5.83660600 |
| H | -2.40656300 | -1.76988100 | 6.91812800 |
| H | -3.48012900 | -1.13682500 | 5.63404400 |
| H | -2.76056100 | -2.77573100 | 5.47423300 |
| O | -1.41258700 | -1.17729500 | 5.24478800 |
| H | -1.87587400 | 0.68808300  | 0.20949400 |

**TS9'**

0 1

|   |             |             |             |
|---|-------------|-------------|-------------|
| C | 4.37052300  | 4.35181700  | 1.66765100  |
| C | 3.35748400  | 3.45860400  | 2.02501500  |
| C | 2.02668200  | 3.66932100  | 1.58866200  |
| C | 1.74175800  | 4.80737000  | 0.80002700  |
| C | 2.76157900  | 5.69671300  | 0.44976900  |
| C | 4.07836000  | 5.47283300  | 0.87630300  |
| H | 5.39048000  | 4.17295300  | 2.00636400  |
| H | 3.58112300  | 2.58522200  | 2.63366400  |
| H | 0.72339200  | 4.97884800  | 0.46565000  |
| H | 2.52727500  | 6.56640100  | -0.16293800 |
| H | 4.87034200  | 6.16532500  | 0.59465800  |
| C | 1.01696900  | 2.71924400  | 1.91612100  |
| C | 0.19847300  | 1.85761900  | 2.18291100  |
| C | -0.63974800 | 0.72274400  | 2.51368400  |
| O | -1.01111100 | -2.51823000 | 3.82277700  |
| C | 0.18143500  | -3.16484800 | 4.28822700  |
| H | 1.04706500  | -2.89552800 | 3.66483700  |
| H | 0.39237300  | -2.91119000 | 5.33813300  |
| H | -0.00038400 | -4.24273300 | 4.20123600  |
| C | -1.12106900 | -0.16162700 | 1.29900100  |
| C | -2.10694400 | -0.96199400 | 1.85422100  |

|   |             |             |             |
|---|-------------|-------------|-------------|
| C | -2.81598300 | -2.09268800 | 1.25404800  |
| C | -4.18450400 | -2.29647300 | 1.54092600  |
| C | -2.16562900 | -3.00988400 | 0.40358100  |
| C | -4.88778200 | -3.35442500 | 0.96156200  |
| H | -4.70310300 | -1.58977700 | 2.18257400  |
| C | -2.86607600 | -4.08049000 | -0.15833800 |
| H | -1.10296400 | -2.89636800 | 0.20941300  |
| C | -4.23062100 | -4.25398700 | 0.10952500  |
| H | -5.94938500 | -3.47640900 | 1.17258400  |
| H | -2.34248800 | -4.78458900 | -0.80361600 |
| H | -4.77522200 | -5.08714600 | -0.33351700 |
| C | -1.97110900 | 0.95040900  | 3.27699800  |
| H | -2.68684000 | 1.54537500  | 2.70682100  |
| H | -1.82269000 | 1.37027000  | 4.27885300  |
| C | -2.32226600 | -0.55319900 | 3.30272300  |
| H | -3.26569700 | -0.86417800 | 3.76070400  |
| C | -1.06731800 | -1.12196400 | 4.06644500  |
| C | 0.09919500  | -0.27637100 | 3.48464100  |
| H | 0.61983400  | 0.26400900  | 4.28193300  |
| H | 0.81211400  | -0.88532500 | 2.92548000  |
| C | 1.86282700  | -3.12289900 | -2.66588700 |
| C | 2.86776900  | -2.62892800 | -1.79184000 |
| C | 4.06134200  | -3.36414300 | -1.63663600 |
| C | 4.26133700  | -4.57639400 | -2.30349100 |
| C | 3.25537400  | -5.08299100 | -3.13479300 |
| C | 2.07391800  | -4.35865900 | -3.31086700 |
| C | 0.59590200  | -2.39653900 | -2.95084700 |
| C | -0.64301700 | -3.01545200 | -2.70443700 |
| C | -1.83926100 | -2.34876000 | -2.98414300 |
| C | -1.81685000 | -1.05616400 | -3.52137400 |

|   |             |             |             |
|---|-------------|-------------|-------------|
| C | -0.59013800 | -0.43375700 | -3.77844000 |
| C | 0.60624100  | -1.09949600 | -3.49655700 |
| H | 4.84186400  | -3.00140400 | -0.97281200 |
| H | 5.19312800  | -5.12289300 | -2.16490400 |
| H | 3.39395400  | -6.03126000 | -3.65242900 |
| H | 1.29859200  | -4.73391400 | -3.97702700 |
| H | -0.66213100 | -4.01238200 | -2.26767500 |
| H | -2.78782000 | -2.82806900 | -2.75552900 |
| H | -2.74644400 | -0.52962800 | -3.72233100 |
| H | -0.56439400 | 0.57418400  | -4.18545200 |
| H | 1.55398000  | -0.61662500 | -3.71764600 |
| P | 2.59528600  | -1.11529000 | -0.77369900 |
| C | 3.44302800  | 0.27602800  | -1.69323900 |
| C | 2.86538200  | 1.64912400  | -1.29091000 |
| C | 4.98231900  | 0.23323800  | -1.59049800 |
| H | 3.18256500  | 0.09643100  | -2.74580300 |
| C | 3.50952600  | 2.77064000  | -2.12531000 |
| H | 3.05488900  | 1.84347200  | -0.22931000 |
| H | 1.77896500  | 1.64414200  | -1.41849000 |
| C | 5.60598200  | 1.37053800  | -2.42608400 |
| H | 5.28733200  | 0.35266800  | -0.54061800 |
| H | 5.35748800  | -0.74088900 | -1.93585700 |
| C | 5.04466300  | 2.74295700  | -2.00896900 |
| H | 3.11618600  | 3.74006000  | -1.79174800 |
| H | 3.22312300  | 2.64353200  | -3.18300800 |
| H | 6.70069200  | 1.35023300  | -2.31729500 |
| H | 5.38140600  | 1.19589300  | -3.49116800 |
| H | 5.49054400  | 3.53760200  | -2.62542400 |
| H | 5.32587000  | 2.94686000  | -0.96311200 |
| C | 3.58361900  | -1.40202500 | 0.78610700  |

|    |             |             |             |
|----|-------------|-------------|-------------|
| C  | 3.55565500  | -0.14129100 | 1.67938500  |
| C  | 3.01794200  | -2.62440700 | 1.54253700  |
| H  | 4.62857400  | -1.59704000 | 0.50752400  |
| C  | 4.30021200  | -0.38455400 | 3.00546900  |
| H  | 2.51494000  | 0.14392200  | 1.88343400  |
| H  | 4.01596100  | 0.70355000  | 1.15791500  |
| C  | 3.77482700  | -2.85988100 | 2.86315500  |
| H  | 1.95471300  | -2.43461100 | 1.75473500  |
| H  | 3.06247300  | -3.52100000 | 0.91068900  |
| C  | 3.74449800  | -1.60717200 | 3.75702700  |
| H  | 4.22724400  | 0.51586300  | 3.63308700  |
| H  | 5.37029300  | -0.54649700 | 2.79307300  |
| H  | 3.33288900  | -3.71800600 | 3.39036700  |
| H  | 4.82185900  | -3.12211800 | 2.63803000  |
| H  | 4.31947700  | -1.78208900 | 4.67824400  |
| H  | 2.70526300  | -1.40520600 | 4.05619100  |
| Au | 0.43597200  | -0.65806200 | -0.03878400 |
| N  | -2.64051800 | 1.41587200  | -0.34519800 |
| S  | -4.29896700 | 1.38757700  | -0.07899600 |
| S  | -1.94566700 | 2.35061700  | -1.55934000 |
| O  | -4.94421500 | 2.63825500  | -0.48018000 |
| O  | -4.49482500 | 0.82448800  | 1.25713500  |
| O  | -0.52395800 | 2.01594600  | -1.57613300 |
| O  | -2.74261300 | 2.36001200  | -2.78830300 |
| C  | -4.94209600 | 0.02497700  | -1.29356200 |
| C  | -2.00878400 | 4.15992100  | -0.84834000 |
| F  | -5.13763600 | 0.53804900  | -2.51261000 |
| F  | -4.06060600 | -0.97675100 | -1.36690100 |
| F  | -6.10727200 | -0.43950100 | -0.81570500 |
| F  | -0.96276200 | 4.82576000  | -1.37341900 |

|   |             |             |             |
|---|-------------|-------------|-------------|
| F | -3.13535200 | 4.78032000  | -1.19455900 |
| F | -1.89288700 | 4.13553300  | 0.48641100  |
| O | -1.14485300 | -0.85678200 | 5.46493200  |
| H | -1.91773800 | 0.65783200  | 0.35403500  |
| H | -1.93679600 | -1.31970000 | 5.77896400  |

## IM5

0 1

|   |             |             |             |
|---|-------------|-------------|-------------|
| C | 6.49924500  | -0.70296800 | 1.35291900  |
| C | 5.12703200  | -0.44433400 | 1.29688500  |
| C | 4.44279400  | -0.47644400 | 0.05811500  |
| C | 5.17316900  | -0.77498400 | -1.11726700 |
| C | 6.54527500  | -1.03117900 | -1.05041700 |
| C | 7.21345800  | -0.99691600 | 0.18224800  |
| H | 7.01276200  | -0.67555400 | 2.31325200  |
| H | 4.57079600  | -0.21711800 | 2.20454600  |
| H | 4.65241500  | -0.80260100 | -2.07269900 |
| H | 7.09512000  | -1.25902600 | -1.96280900 |
| H | 8.28277300  | -1.19824500 | 0.23017400  |
| C | 3.04126800  | -0.21486200 | -0.00666300 |
| C | 1.84382800  | 0.00289600  | -0.07081500 |
| C | 0.42072900  | 0.27555500  | -0.14817200 |
| O | -2.52219700 | 1.57479600  | 1.03503200  |
| C | -2.56999200 | 2.44369200  | 2.17323800  |
| H | -1.60180900 | 2.48297200  | 2.70005500  |
| H | -2.86383500 | 3.46381400  | 1.88788000  |
| H | -3.32386600 | 2.01406300  | 2.84391200  |
| C | -0.52219800 | -0.88003000 | 0.21263400  |
| C | -1.73497200 | -0.61485300 | -0.32476900 |
| C | -2.97793100 | -1.37810300 | -0.19385000 |

|   |             |             |             |
|---|-------------|-------------|-------------|
| C | -4.23151700 | -0.74474500 | -0.33184500 |
| C | -2.95058600 | -2.76691200 | 0.06636500  |
| C | -5.41794100 | -1.47449200 | -0.20062600 |
| H | -4.26425100 | 0.32858000  | -0.50090000 |
| C | -4.13682100 | -3.49314700 | 0.19683900  |
| H | -1.98955300 | -3.27311100 | 0.14874100  |
| C | -5.37756900 | -2.85047400 | 0.06353700  |
| H | -6.37676000 | -0.96628600 | -0.30048000 |
| H | -4.09573100 | -4.56396900 | 0.39470000  |
| H | -6.30225400 | -3.41798600 | 0.16216900  |
| C | -0.15932000 | 0.64328300  | -1.55066500 |
| H | -0.02460000 | -0.16785400 | -2.27510200 |
| H | 0.26654400  | 1.57088600  | -1.94469200 |
| C | -1.61549900 | 0.74111100  | -1.03465500 |
| H | -2.40366000 | 0.97977000  | -1.75397500 |
| C | -1.48983800 | 1.82181000  | 0.11174700  |
| C | -0.04957100 | 1.54102100  | 0.67988500  |
| H | 0.62903100  | 2.38089900  | 0.49180600  |
| H | -0.06560600 | 1.33155100  | 1.75312000  |
| C | -0.90877400 | 3.71607900  | -1.36631200 |
| H | -1.19194900 | 4.77411500  | -1.43570900 |
| H | 0.17298800  | 3.65676800  | -1.15536100 |
| H | -1.11275600 | 3.23171000  | -2.33569700 |
| O | -1.70240200 | 3.17153700  | -0.31857300 |
| H | -0.25460600 | -1.69004700 | 0.88524800  |

**IM5'**

0 1

|   |            |            |            |
|---|------------|------------|------------|
| C | 6.71695100 | 0.40305900 | 0.16415200 |
| C | 5.34652400 | 0.67680300 | 0.15947000 |

|   |             |             |             |
|---|-------------|-------------|-------------|
| C | 4.40844000  | -0.37192600 | 0.00462900  |
| C | 4.88417100  | -1.69698800 | -0.14376400 |
| C | 6.25645200  | -1.95984900 | -0.13695200 |
| C | 7.17765100  | -0.91338400 | 0.01626300  |
| H | 7.42813100  | 1.21961800  | 0.28302500  |
| H | 4.98687900  | 1.69782000  | 0.27353500  |
| H | 4.16727500  | -2.50735500 | -0.26275300 |
| H | 6.60816900  | -2.98443000 | -0.25197400 |
| H | 8.24655300  | -1.12236200 | 0.02036400  |
| C | 3.00768500  | -0.10145400 | -0.00324900 |
| C | 1.80964100  | 0.12124600  | -0.01453700 |
| C | 0.38644600  | 0.39688800  | -0.02996300 |
| C | -0.54739800 | -0.79350000 | 0.22029500  |
| C | -1.77559300 | -0.47121400 | -0.24930700 |
| C | -3.02283800 | -1.23473100 | -0.14116300 |
| C | -4.27358400 | -0.58107100 | -0.20181200 |
| C | -3.00574800 | -2.63785300 | 0.03389200  |
| C | -5.46559500 | -1.30449200 | -0.07822200 |
| H | -4.30489700 | 0.49956200  | -0.32283200 |
| C | -4.19649600 | -3.35665800 | 0.15292700  |
| H | -2.04952200 | -3.15861600 | 0.05653900  |
| C | -5.43334700 | -2.69350600 | 0.09943100  |
| H | -6.42026700 | -0.78134700 | -0.12037700 |
| H | -4.16352000 | -4.43817600 | 0.28056300  |
| H | -6.36113700 | -3.25670600 | 0.19025900  |
| C | -0.23083600 | 0.94202300  | -1.36484600 |
| H | -0.08795200 | 0.24429900  | -2.19820800 |
| H | 0.14485100  | 1.93972300  | -1.62182400 |
| C | -1.67275500 | 0.94902200  | -0.81435300 |
| H | -2.47808000 | 1.24092800  | -1.49232100 |

|   |             |             |             |
|---|-------------|-------------|-------------|
| C | -1.49576900 | 1.92906600  | 0.42134600  |
| C | -0.08313000 | 1.53199800  | 0.96714300  |
| H | 0.59345700  | 2.39156300  | 0.91288000  |
| H | -0.13402500 | 1.17265900  | 1.99989100  |
| C | -2.59665500 | 3.81740700  | -0.59573800 |
| H | -2.41902000 | 4.89539000  | -0.68685400 |
| H | -2.74341200 | 3.39432300  | -1.60325800 |
| H | -3.49540700 | 3.64351200  | 0.01210500  |
| O | -1.42357400 | 3.28195200  | 0.03751100  |
| H | -0.26296500 | -1.67258300 | 0.79241500  |
| O | -2.54491500 | 1.81816500  | 1.38500300  |
| H | -2.67250700 | 0.87592400  | 1.56486300  |

**TS10**

0 1

|   |             |             |             |
|---|-------------|-------------|-------------|
| C | -6.57459900 | -0.61065000 | -1.29526400 |
| C | -5.19378800 | -0.39960200 | -1.25476400 |
| C | -4.49831100 | -0.45117000 | -0.02293000 |
| C | -5.22557100 | -0.71995900 | 1.16128000  |
| C | -6.60635900 | -0.92875000 | 1.10980500  |
| C | -7.28582100 | -0.87627100 | -0.11602400 |
| H | -7.09703900 | -0.56845600 | -2.25022600 |
| H | -4.63973800 | -0.19414000 | -2.16890400 |
| H | -4.69582100 | -0.76127300 | 2.11123000  |
| H | -7.15414000 | -1.13384800 | 2.02880300  |
| H | -8.36188700 | -1.04073200 | -0.15203200 |
| C | -3.08738300 | -0.24275700 | 0.02423800  |
| C | -1.88229700 | -0.06802400 | 0.06832600  |
| C | -0.44764300 | 0.13708000  | 0.11207500  |
| C | 0.43110200  | -1.07690700 | -0.23246300 |



|   |             |             |             |
|---|-------------|-------------|-------------|
| C | 1.67249700  | -0.84858000 | 0.25334800  |
| C | 2.88858700  | -1.64646600 | 0.08347300  |
| C | 4.15824800  | -1.03039700 | 0.09824100  |
| C | 2.81809500  | -3.04559900 | -0.10043500 |
| C | 5.32038900  | -1.78974600 | -0.07575900 |
| H | 4.22010500  | 0.05042200  | 0.20302800  |
| C | 3.98086100  | -3.80076700 | -0.27185000 |
| H | 1.84509400  | -3.53516900 | -0.08919000 |
| C | 5.23816600  | -3.17669600 | -0.25945900 |
| H | 6.29203900  | -1.29660100 | -0.07270200 |
| H | 3.90906900  | -4.87964500 | -0.40657100 |
| H | 6.14408200  | -3.76743700 | -0.38969000 |
| C | 0.18441200  | 0.53156100  | 1.49023000  |
| H | 0.01228700  | -0.23929000 | 2.24972700  |
| H | -0.15105300 | 1.51415200  | 1.83943300  |
| C | 1.63058000  | 0.52634200  | 0.94662300  |
| H | 2.45367200  | 0.73722900  | 1.63261000  |
| C | 1.51363300  | 1.52797200  | -0.22445900 |
| C | 0.08238400  | 1.32543300  | -0.79337300 |
| H | -0.54155300 | 2.21488000  | -0.66571000 |
| H | 0.12226400  | 1.04940600  | -1.85195800 |
| C | 2.31887100  | 3.49099500  | 1.48263700  |
| H | 2.32410000  | 4.57770400  | 1.65990300  |
| H | 2.18713600  | 2.97865800  | 2.44618000  |
| H | 3.28510900  | 3.19673700  | 1.03856500  |
| O | 1.23343100  | 3.17332900  | 0.60649600  |
| H | 0.10852600  | -1.89213800 | -0.87410800 |
| O | 2.53872700  | 1.74120500  | -0.99101400 |
| H | 2.29023000  | 2.80410900  | -1.51945400 |
| O | 1.83039900  | 3.94492400  | -1.59256200 |

|                      |             |             |             |
|----------------------|-------------|-------------|-------------|
| H                    | 1.45709600  | 3.76040700  | -0.45291400 |
| H                    | 2.55365600  | 4.58710900  | -1.60035600 |
| <b>P<sub>1</sub></b> |             |             |             |
| 0 1                  |             |             |             |
| C                    | -6.19983500 | -0.57759400 | -1.29918200 |
| C                    | -4.83954600 | -0.26204200 | -1.24889800 |
| C                    | -4.15076200 | -0.26249300 | -0.01230800 |
| C                    | -4.86291700 | -0.58688000 | 1.16699400  |
| C                    | -6.22356500 | -0.89983700 | 1.10563300  |
| C                    | -6.89686200 | -0.89632600 | -0.12465200 |
| H                    | -6.71767800 | -0.57343700 | -2.25749000 |
| H                    | -4.29648100 | -0.01349300 | -2.15888300 |
| H                    | -4.33855200 | -0.58880100 | 2.12079600  |
| H                    | -6.76078600 | -1.14632000 | 2.02060600  |
| H                    | -7.95735500 | -1.14060600 | -0.16785200 |
| C                    | -2.76281500 | 0.06593700  | 0.04165700  |
| C                    | -1.57885900 | 0.35068700  | 0.08090700  |
| C                    | -0.17425000 | 0.70920800  | 0.11355500  |
| C                    | 0.84293000  | -0.40729600 | -0.17955300 |
| C                    | 2.04942900  | -0.01977800 | 0.29858800  |
| C                    | 3.35731700  | -0.65523100 | 0.11613100  |
| C                    | 4.54193700  | 0.11031200  | 0.17169300  |
| C                    | 3.46018600  | -2.04310400 | -0.12928200 |
| C                    | 5.78941600  | -0.49248000 | -0.02600800 |
| H                    | 4.47998000  | 1.18346400  | 0.34224500  |
| C                    | 4.70696300  | -2.64176300 | -0.32092800 |
| H                    | 2.55486600  | -2.64794400 | -0.15227200 |
| C                    | 5.87813500  | -1.86901600 | -0.27103100 |
| H                    | 6.69282200  | 0.11509000  | 0.01072400  |

|   |             |             |             |
|---|-------------|-------------|-------------|
| H | 4.76872100  | -3.71403700 | -0.50367200 |
| H | 6.84983500  | -2.33859400 | -0.41818700 |
| C | 0.40403300  | 1.23458900  | 1.47296100  |
| H | 0.31123300  | 0.49293900  | 2.27471400  |
| H | -0.04933400 | 2.18868200  | 1.77528400  |
| C | 1.85286300  | 1.36328000  | 0.94493000  |
| H | 2.64009100  | 1.70194500  | 1.62197000  |
| C | 1.62708400  | 2.28163700  | -0.28520800 |
| C | 0.22762400  | 1.90888500  | -0.82842900 |
| H | -0.44935700 | 2.76426500  | -0.69324700 |
| H | 0.25267900  | 1.64109100  | -1.88999300 |
| H | 0.62125100  | -1.27437700 | -0.79507100 |
| O | 2.38837700  | 3.11074500  | -0.73188800 |

**TS-S1**

0 1

|   |            |             |             |
|---|------------|-------------|-------------|
| C | 3.83984800 | -3.12418100 | -1.26184200 |
| C | 4.13680100 | -2.42376600 | -0.06148000 |
| C | 4.95876400 | -3.03846900 | 0.90528000  |
| C | 5.46200000 | -4.32942800 | 0.72173700  |
| C | 5.13796800 | -5.03682700 | -0.44169100 |
| C | 4.33993100 | -4.43454200 | -1.41692200 |
| C | 3.05222700 | -2.55373300 | -2.38949900 |
| C | 1.95367000 | -3.26329900 | -2.90958900 |
| C | 1.24201800 | -2.77346500 | -4.00816000 |
| C | 1.61565400 | -1.56423200 | -4.60679400 |
| C | 2.70051800 | -0.84320500 | -4.09378200 |
| C | 3.41621800 | -1.33771300 | -2.99917400 |
| H | 5.19899200 | -2.51130400 | 1.82533000  |
| H | 6.09378000 | -4.77928600 | 1.48627100  |

|   |            |             |             |
|---|------------|-------------|-------------|
| H | 5.51377900 | -6.04745500 | -0.59542600 |
| H | 4.11042400 | -4.97014500 | -2.33685800 |
| H | 1.65140500 | -4.19474800 | -2.43427200 |
| H | 0.38298400 | -3.32562400 | -4.38312900 |
| H | 1.06108900 | -1.18200700 | -5.46221800 |
| H | 3.00038600 | 0.09794700  | -4.55265700 |
| H | 4.28045300 | -0.79109900 | -2.63642900 |
| P | 3.42525200 | -0.76000300 | 0.30222700  |
| C | 4.78416400 | 0.42721500  | -0.20941100 |
| C | 4.21063000 | 1.78183900  | -0.67077900 |
| C | 5.89071400 | 0.59609300  | 0.85224000  |
| H | 5.25369700 | -0.06005100 | -1.07516200 |
| C | 5.33575600 | 2.69720700  | -1.18653400 |
| H | 3.70128000 | 2.27151400  | 0.16795800  |
| H | 3.44887500 | 1.61858700  | -1.44486700 |
| C | 7.00420500 | 1.52256500  | 0.32278000  |
| H | 5.46541400 | 1.03585500  | 1.76503900  |
| H | 6.30827500 | -0.38527500 | 1.11963200  |
| C | 6.43353700 | 2.88206600  | -0.12331900 |
| H | 4.91254900 | 3.66926900  | -1.47292600 |
| H | 5.78086200 | 2.24842700  | -2.09104300 |
| H | 7.76966500 | 1.66153400  | 1.10063400  |
| H | 7.49664200 | 1.03706800  | -0.53606900 |
| H | 7.23926500 | 3.52172600  | -0.51292000 |
| H | 6.00086300 | 3.39782500  | 0.74905200  |
| C | 3.31875200 | -0.66225600 | 2.15975700  |
| C | 2.79765400 | 0.72836500  | 2.58548400  |
| C | 2.38640400 | -1.76355000 | 2.70748300  |
| H | 4.32673800 | -0.79419000 | 2.57796300  |
| C | 2.72394000 | 0.82247500  | 4.12206200  |

|    |             |             |             |
|----|-------------|-------------|-------------|
| H  | 1.80180600  | 0.87904900  | 2.14753200  |
| H  | 3.43809300  | 1.52685800  | 2.19481800  |
| C  | 2.30436000  | -1.68609800 | 4.24488300  |
| H  | 1.38885200  | -1.61729100 | 2.26905300  |
| H  | 2.73528600  | -2.75717400 | 2.39813300  |
| C  | 1.85128400  | -0.29416100 | 4.72482400  |
| H  | 2.33048400  | 1.80733200  | 4.41315800  |
| H  | 3.74544400  | 0.74738300  | 4.53128400  |
| H  | 1.61544600  | -2.45832700 | 4.61743600  |
| H  | 3.29963100  | -1.90868400 | 4.66473300  |
| H  | 1.88262500  | -0.24598500 | 5.82329100  |
| H  | 0.80756600  | -0.13280200 | 4.42663500  |
| Au | 1.30030000  | -0.31599000 | -0.52722900 |
| C  | -6.93325800 | 2.18488400  | -0.92222100 |
| C  | -5.55947200 | 1.94615400  | -0.99705700 |
| C  | -4.69895600 | 2.88949200  | -1.61074300 |
| C  | -5.25603000 | 4.07344600  | -2.14578000 |
| C  | -6.63298500 | 4.30425400  | -2.06506400 |
| C  | -7.47613100 | 3.36389400  | -1.45518700 |
| H  | -7.57932000 | 1.45031400  | -0.44360800 |
| H  | -5.13109900 | 1.04101000  | -0.57759400 |
| H  | -4.59982800 | 4.80351600  | -2.61642800 |
| H  | -7.04963100 | 5.22233700  | -2.47807300 |
| H  | -8.54765500 | 3.54972100  | -1.39300800 |
| C  | -3.30346600 | 2.60882400  | -1.67831300 |
| C  | -2.14642900 | 2.23428100  | -1.65808300 |
| C  | -0.78861400 | 1.66116500  | -1.67955100 |
| O  | -1.13312000 | -1.99400700 | -2.16752300 |
| C  | -1.09381900 | -2.79769000 | -0.97642400 |
| H  | -0.24055100 | -2.52362900 | -0.34150900 |

|   |             |             |             |
|---|-------------|-------------|-------------|
| H | -2.02852200 | -2.70869100 | -0.41577100 |
| H | -0.97958600 | -3.83113800 | -1.32098500 |
| C | 0.14086000  | 2.60802100  | -1.05751000 |
| C | 0.90651100  | 3.36612700  | -0.49134000 |
| C | 1.83313900  | 4.18199400  | 0.21768200  |
| C | 2.65017900  | 5.11829500  | -0.45750900 |
| C | 1.97964700  | 4.03200400  | 1.61778700  |
| C | 3.59426700  | 5.86989300  | 0.24747800  |
| H | 2.53919100  | 5.23916100  | -1.53339000 |
| C | 2.92697900  | 4.78716900  | 2.31354900  |
| H | 1.35141500  | 3.31332200  | 2.13861800  |
| C | 3.74087000  | 5.70497400  | -1.63249700 |
| H | 4.22074900  | 6.58409000  | -0.28557500 |
| H | 3.03110200  | 4.66000100  | 3.39042700  |
| H | 4.47981700  | 6.29095700  | 2.17734400  |
| C | -0.41577100 | 1.27455400  | -3.14815500 |
| H | 0.64877000  | 1.01107900  | -3.16303400 |
| H | -0.60717500 | 2.09110900  | -3.85385000 |
| C | -1.28829100 | 0.03339600  | -3.40589100 |
| H | -2.26181000 | 0.34268600  | -3.79796600 |
| H | -0.83231100 | -0.66406000 | -4.11301900 |
| C | -1.45202200 | -0.65504300 | -2.02588300 |
| C | -0.72849400 | 0.22507500  | -0.99932400 |
| H | -1.27238100 | 0.25477200  | -0.05469900 |
| O | -2.95689200 | -0.59729200 | -1.59546800 |
| N | -3.75768600 | -0.82396700 | 0.77055700  |
| S | -3.29624000 | 0.27293800  | 1.97979800  |
| S | -4.57225500 | -2.24963100 | 1.12602300  |
| O | -4.21088000 | 0.24669100  | 3.11769100  |
| O | -2.94694900 | 1.51040000  | 1.29067700  |

|   |             |             |             |
|---|-------------|-------------|-------------|
| O | -4.39417700 | -3.13084600 | -0.03136100 |
| O | -4.33279600 | -2.70997000 | 2.49309400  |
| C | -1.59522800 | -0.47571400 | 2.61935800  |
| C | -6.41459300 | -1.69034500 | 1.02740700  |
| F | -1.71146300 | -0.82885200 | 3.90198300  |
| F | -1.23848500 | -1.54734400 | 1.89644300  |
| F | -0.65444500 | 0.47052900  | 2.49912400  |
| F | -6.68155700 | -1.27966400 | -0.22741700 |
| F | -7.18856600 | -2.74365000 | 1.32076700  |
| F | -6.66688400 | -0.69386600 | 1.87572600  |
| H | -3.29666100 | -0.70754200 | -0.37296500 |
| C | -3.92108000 | -1.18390600 | -2.49972100 |
| H | -4.82927500 | -1.37097200 | -1.92284100 |
| H | -4.14205900 | -0.47780100 | -3.30974900 |
| H | -3.53649200 | -2.12984000 | -2.89946100 |

**IM-S1**

0 1

|   |            |             |             |
|---|------------|-------------|-------------|
| C | 3.87308500 | -3.06658800 | -1.33145200 |
| C | 4.12474000 | -2.43052300 | -0.08524900 |
| C | 4.88121000 | -3.11139200 | 0.89006400  |
| C | 5.36750700 | -4.40285800 | 0.66726500  |
| C | 5.09293000 | -5.04386600 | -0.54620100 |
| C | 4.35675300 | -4.37694300 | -1.52850900 |
| C | 3.13760400 | -2.42882800 | -2.45882200 |
| C | 2.03105100 | -3.08057600 | -3.03328400 |
| C | 1.36079200 | -2.52133900 | -4.12465100 |
| C | 1.78521500 | -1.30053500 | -4.66241700 |
| C | 2.88233100 | -0.63902800 | -4.09771500 |
| C | 3.55511500 | -1.20216500 | -3.00954800 |

|   |            |             |             |
|---|------------|-------------|-------------|
| H | 5.07607700 | -2.63988600 | 1.84978200  |
| H | 5.94724800 | -4.90460000 | 1.44071800  |
| H | 5.45658800 | -6.05361400 | -0.73171800 |
| H | 4.16168500 | -4.86186400 | -2.48388900 |
| H | 1.68612500 | -4.01914900 | -2.60368000 |
| H | 0.49165300 | -3.02739800 | -4.53842900 |
| H | 1.26023300 | -0.86250000 | -5.50970100 |
| H | 3.22304000 | 0.31061900  | -4.50829900 |
| H | 4.42860700 | -0.70103400 | -2.60686200 |
| P | 3.41773500 | -0.77270100 | 0.31395400  |
| C | 4.78692100 | 0.42871200  | -0.13993800 |
| C | 4.21313000 | 1.78318100  | -0.60158300 |
| C | 5.86637500 | 0.59223600  | 0.95046300  |
| H | 5.28696000 | -0.04087400 | -0.99737000 |
| C | 5.34322400 | 2.71498500  | -1.07618500 |
| H | 3.67415400 | 2.25778800  | 0.22754400  |
| H | 3.47644200 | 1.61856100  | -1.39932500 |
| C | 6.98507400 | 1.53232200  | 0.45641300  |
| H | 5.42071300 | 1.01794700  | 1.85952000  |
| H | 6.28496400 | -0.38934900 | 1.21547700  |
| C | 6.41393500 | 2.89330700  | 0.01538000  |
| H | 4.91974700 | 3.68791600  | -1.35939800 |
| H | 5.81309600 | 2.28235100  | -1.97591000 |
| H | 7.73303600 | 1.66645100  | 1.25184800  |
| H | 7.49852800 | 1.06095700  | -0.39790700 |
| H | 7.22324500 | 3.54493900  | -0.34581600 |
| H | 5.95639300 | 3.39317000  | 0.88416700  |
| C | 3.29209200 | -0.71564200 | 2.17181500  |
| C | 2.77526800 | 0.66966400  | 2.62189500  |
| C | 2.34405100 | -1.81703500 | 2.69122200  |



|    |             |             |             |
|----|-------------|-------------|-------------|
| H  | 4.29574600  | -0.86249500 | 2.59645600  |
| C  | 2.70438700  | 0.73400600  | 4.16028100  |
| H  | 1.78000200  | 0.82840000  | 2.18639200  |
| H  | 3.41443700  | 1.47582600  | 2.24578500  |
| C  | 2.25960200  | -1.77402800 | 4.22985000  |
| H  | 1.35076500  | -1.64635700 | 2.25203500  |
| H  | 2.67811000  | -2.80845800 | 2.35984800  |
| C  | 1.82418900  | -0.38786300 | 4.74196600  |
| H  | 2.31982900  | 1.71564800  | 4.47312000  |
| H  | 3.72610600  | 0.64289900  | 4.56559000  |
| H  | 1.56016800  | -2.54556000 | 4.58412400  |
| H  | 3.25102000  | -2.01993300 | 4.64558200  |
| H  | 1.85914300  | -0.36436500 | 5.84113600  |
| H  | 0.78101100  | -0.20916000 | 4.45166000  |
| Au | 1.29869600  | -0.31773500 | -0.53413300 |
| C  | -6.96113600 | 2.19846700  | -0.96205600 |
| C  | -5.58949500 | 1.94328400  | -1.02201900 |
| C  | -4.71153400 | 2.87250900  | -1.63216900 |
| C  | -5.25050700 | 4.05899000  | -2.18077700 |
| C  | -6.62536500 | 4.30600900  | -2.11585900 |
| C  | -7.48538800 | 3.37995700  | -1.50764800 |
| H  | -7.62135000 | 1.47455400  | -0.48634900 |
| H  | -5.17735600 | 1.03362500  | -0.59606700 |
| H  | -4.58119300 | 4.77775200  | -2.65017600 |
| H  | -7.02746800 | 5.22558100  | -2.53984700 |
| H  | -8.55527100 | 3.57828900  | -1.45746400 |
| C  | -3.31778200 | 2.58091200  | -1.68479300 |
| C  | -2.15885600 | 2.21162400  | -1.66256400 |
| C  | -0.79299000 | 1.65740900  | -1.67801400 |
| O  | -1.04370200 | -1.99827300 | -2.24427200 |

|   |             |             |             |
|---|-------------|-------------|-------------|
| C | -1.04940700 | -2.82544900 | -1.07467800 |
| H | -0.23737600 | -2.54980100 | -0.38575900 |
| H | -2.01471700 | -2.77683700 | -0.55860000 |
| H | -0.89009200 | -3.85058000 | -1.42917100 |
| C | 0.11508900  | 2.60595800  | -1.02733100 |
| C | 0.87215400  | 3.35897200  | -0.44280100 |
| C | 1.78788200  | 4.16994300  | 0.28576800  |
| C | 2.62394600  | 5.10223000  | -0.37202900 |
| C | 1.90398800  | 4.02089800  | 1.68895400  |
| C | 3.55568300  | 5.85046800  | 0.35274400  |
| H | 2.53742300  | 5.22252600  | -1.45020300 |
| C | 2.83860400  | 4.77340900  | 2.40480200  |
| H | 1.26066900  | 3.30635100  | 2.19713900  |
| C | 3.67076200  | 5.68747400  | 1.74100000  |
| H | 4.19670000  | 6.56125000  | -0.16745400 |
| H | 2.91804100  | 4.64764600  | 3.48400300  |
| H | 4.39956300  | 6.27148000  | 2.30137000  |
| C | -0.39255800 | 1.30258300  | -3.14716800 |
| H | 0.67636300  | 1.05671500  | -3.14687100 |
| H | -0.58092000 | 2.13062900  | -3.84084100 |
| C | -1.24240200 | 0.05457400  | -3.44448800 |
| H | -2.20700100 | 0.35780200  | -3.86337900 |
| H | -0.75549800 | -0.62290800 | -4.15033100 |
| C | -1.44799500 | -0.66066200 | -2.07642200 |
| C | -0.72608800 | 0.21072700  | -1.02372700 |
| H | -1.29115900 | 0.22294500  | -0.08911300 |
| O | -2.88238600 | -0.66231400 | -1.66518600 |
| N | -3.80462600 | -0.81650800 | 0.81790300  |
| S | -3.29225600 | 0.27741200  | 2.02828900  |
| S | -4.60547600 | -2.27951000 | 1.13006400  |

|   |             |             |             |
|---|-------------|-------------|-------------|
| O | -4.20362500 | 0.21460400  | 3.16338000  |
| O | -2.95919000 | 1.51557100  | 1.33893000  |
| O | -4.39359000 | -3.13367900 | -0.03678900 |
| O | -4.36413900 | -2.72809800 | 2.49723700  |
| C | -1.58770200 | -0.50170600 | 2.61623600  |
| C | -6.44157700 | -1.70708900 | 1.01645100  |
| F | -1.69426700 | -0.88618000 | 3.88906800  |
| F | -1.26049900 | -1.55429600 | 1.85726800  |
| F | -0.64876200 | 0.44229900  | 2.50459700  |
| F | -6.67444900 | -1.25061100 | -0.22485200 |
| F | -7.22160700 | -2.76634800 | 1.25754600  |
| F | -6.69325500 | -0.74341000 | 1.90013900  |
| H | -3.35805200 | -0.72683200 | -0.17045300 |
| C | -3.82150400 | -1.22858600 | -2.59702100 |
| H | -4.73785000 | -1.43750600 | -2.03791300 |
| H | -4.04823600 | -0.51254500 | -3.39992900 |
| H | -3.43279400 | -2.16453500 | -3.01980000 |

**TS-S2**

0 1

|   |            |             |             |
|---|------------|-------------|-------------|
| C | 4.27528200 | -1.56278000 | -0.84963500 |
| C | 4.19154400 | -0.31142900 | -0.17942900 |
| C | 5.21170900 | 0.05681800  | 0.72277800  |
| C | 6.28830600 | -0.78991000 | 0.99573000  |
| C | 6.35661000 | -2.03771300 | 0.36768700  |
| C | 5.36535300 | -2.40671200 | -0.54227400 |
| C | 3.32930800 | -2.05190200 | -1.89038500 |
| C | 2.86964800 | -3.38401800 | -1.84223900 |
| C | 2.12329200 | -3.92061700 | -2.89340200 |
| C | 1.79673600 | -3.13448800 | -4.00497400 |

|   |            |             |             |
|---|------------|-------------|-------------|
| C | 2.22160000 | -1.80370000 | -4.05481900 |
| C | 2.98309700 | -1.26956900 | -3.00952100 |
| H | 5.16188400 | 1.00857800  | 1.24409300  |
| H | 7.05733800 | -0.47779000 | 1.70048000  |
| H | 7.18254900 | -2.71655200 | 0.57508000  |
| H | 5.43610700 | -3.36337100 | -1.05626000 |
| H | 3.09881900 | -3.99078300 | -0.96908500 |
| H | 1.77880300 | -4.95181800 | -2.83610300 |
| H | 1.20236800 | -3.55192600 | -4.81547600 |
| H | 1.97755600 | -1.18087100 | -4.91462500 |
| H | 3.35822600 | -0.25627700 | -3.09762900 |
| P | 2.76700300 | 0.83080000  | -0.37531800 |
| C | 3.25608100 | 2.02637500  | -1.73942700 |
| C | 2.02098300 | 2.45135400  | -2.55956000 |
| C | 4.09472500 | 3.23132300  | -1.25599200 |
| H | 3.91647200 | 1.43951200  | -2.39175800 |
| C | 2.41685400 | 3.37476300  | -3.72463200 |
| H | 1.30137300 | 2.96031900  | -1.90394300 |
| H | 1.51880700 | 1.55173300  | -2.94106000 |
| C | 4.47756600 | 4.12566300  | -2.45375000 |
| H | 3.52477200 | 3.83062500  | -0.53453200 |
| H | 4.99962200 | 2.87260700  | -0.74559500 |
| C | 3.22893800 | 4.58531700  | -3.22963600 |
| H | 1.51317900 | 3.70481700  | -4.25726500 |
| H | 3.02809600 | 2.80246800  | -4.44219000 |
| H | 5.04993300 | 4.99300600  | -2.09452900 |
| H | 5.13533700 | 3.55840400  | -3.13231400 |
| H | 3.52130600 | 5.22065700  | -4.07791100 |
| H | 2.59671100 | 5.19871200  | -2.56597000 |
| C | 2.67462600 | 1.82799000  | 1.18893500  |

|    |              |             |             |
|----|--------------|-------------|-------------|
| C  | 1.55107200   | 2.88239700  | 1.10815000  |
| C  | 2.42713000   | 0.92435800  | 2.41493100  |
| H  | 3.63137900   | 2.35635200  | 1.30344400  |
| C  | 1.58868900   | 3.76721300  | 2.36763200  |
| H  | 0.58847800   | 2.36201500  | 1.04268600  |
| H  | 1.63497000   | 3.50445600  | 0.21081100  |
| C  | 2.43625500   | 1.76741700  | 3.70479700  |
| H  | 1.44567500   | 0.44873500  | 2.29023500  |
| H  | 3.17115300   | 0.12276700  | 2.48171400  |
| C  | 1.41977000   | 2.92446300  | 3.64491100  |
| H  | 0.80110600   | 4.52654700  | 2.30430000  |
| H  | 2.55629200   | 4.29668000  | 2.40040900  |
| H  | 2.22514500   | 1.11713300  | 4.56482000  |
| H  | 3.44881000   | 2.18046100  | 3.84879900  |
| H  | 1.52037900   | 3.56147800  | 4.53606200  |
| H  | 0.40350700   | 2.51019000  | 3.65824100  |
| Au | 0.66665300   | -0.13677200 | -0.66895700 |
| C  | -8.20390600  | -0.76872000 | -0.61620300 |
| C  | -6.81656500  | -0.61187300 | -0.66904900 |
| C  | -6.24515000  | 0.42361000  | -1.44819200 |
| C  | -7.10046800  | 1.29288900  | -2.16553600 |
| C  | -8.48694100  | 1.12680200  | -2.10486000 |
| C  | -9.04404700  | 0.09753000  | -1.33192900 |
| H  | -8.63137500  | -1.56849500 | -0.01243700 |
| H  | -6.15918200  | -1.27786700 | -0.11379100 |
| H  | -6.66509200  | 2.09178600  | -2.76332600 |
| H  | -9.13501700  | 1.80351800  | -2.66083300 |
| H  | -10.12515100 | -0.02776100 | -1.28666400 |
| C  | -4.82928700  | 0.57121000  | -1.49968800 |
| C  | -3.61407100  | 0.61385900  | -1.52510700 |

|   |             |             |             |
|---|-------------|-------------|-------------|
| C | -2.14477500 | 0.71543300  | -1.51809300 |
| O | -0.68005100 | -2.62700400 | -2.33642700 |
| C | -0.61879300 | -3.50231800 | -1.20028700 |
| H | 0.10587400  | -3.11619900 | -0.47728700 |
| H | -1.60521100 | -3.61749700 | -0.73482600 |
| H | -0.27394500 | -4.47731000 | -1.56294600 |
| C | -1.82035600 | 1.92698900  | -0.75676200 |
| C | -1.66201900 | 2.98600800  | -0.17794800 |
| C | -1.46728600 | 4.19667200  | 0.54542000  |
| C | -0.77188700 | 5.28196000  | -0.03741900 |
| C | -1.96140300 | 4.32915400  | 1.86468300  |
| C | -0.57332700 | 6.46248100  | 0.68301100  |
| H | -0.39662400 | 5.18641700  | -1.05476200 |
| C | -1.76069800 | 5.51534100  | 2.57539400  |
| H | -2.49060700 | 3.49488000  | 2.31814100  |
| C | -1.06693000 | 6.58469600  | 1.99036700  |
| H | -0.03481000 | 7.29023200  | 0.22316400  |
| H | -2.14398200 | 5.60389700  | 3.59102700  |
| H | -0.91022800 | 7.50597000  | 2.54960600  |
| C | -1.58789900 | 0.79051800  | -2.98694400 |
| H | -0.60276400 | 1.26700400  | -2.93505800 |
| H | -2.23954800 | 1.40838600  | -3.61420800 |
| C | -1.45753700 | -0.66886200 | -3.47420100 |
| H | -2.21228700 | -0.90886200 | -4.22971600 |
| H | -0.47008900 | -0.84948200 | -3.91124000 |
| C | -1.62753600 | -1.58698000 | -2.23081300 |
| C | -1.50494100 | -0.64666600 | -0.98963700 |
| H | -2.17212000 | -1.03343700 | -0.21766700 |
| O | -2.95198400 | -2.13193000 | -2.10653800 |
| N | -0.64977100 | -1.70374500 | 1.66405900  |

|   |             |             |             |
|---|-------------|-------------|-------------|
| S | -1.99467700 | -1.46196000 | 2.62413700  |
| S | 0.69029500  | -2.51009500 | 2.26962000  |
| O | -2.07152500 | -2.38339800 | 3.76095900  |
| O | -3.14053900 | -1.26228500 | 1.73219500  |
| O | 1.72233100  | -2.44332300 | 1.22820600  |
| O | 1.02101500  | -2.16830900 | 3.65602400  |
| C | -1.65024800 | 0.28803700  | 3.33635500  |
| C | 0.11721600  | -4.39136400 | 2.29577300  |
| F | -0.69628000 | 0.24788700  | 4.27358500  |
| F | -1.25212300 | 1.08970500  | 2.33158300  |
| F | -2.77631900 | 0.78543800  | 3.87214400  |
| F | 1.03201300  | -5.11680300 | 1.62824000  |
| F | 0.04457500  | -4.82455500 | 3.55544700  |
| F | -1.07453000 | -4.54755500 | 1.70010300  |
| H | -0.60684500 | -1.03730500 | 0.30907900  |
| C | -3.36743300 | -3.02388300 | -3.14278800 |
| H | -4.32978900 | -3.43430500 | -2.81441000 |
| H | -3.51703500 | -2.50536500 | -4.10520200 |
| H | -2.64578200 | -3.84282000 | -3.28647600 |

**D**

0 1

|   |             |            |             |
|---|-------------|------------|-------------|
| C | -3.66668100 | 3.98908800 | 1.27954300  |
| C | -2.72441200 | 2.96290900 | 1.17070000  |
| C | -2.53593400 | 2.29334000 | -0.06162700 |
| C | -3.31675400 | 2.68050400 | -1.17677000 |
| C | -4.25734900 | 3.70695900 | -1.05691600 |
| C | -4.43649700 | 4.36456600 | 0.16885700  |
| H | -3.80147100 | 4.49695800 | 2.23373100  |
| H | -2.12630200 | 2.66738700 | 2.03057200  |

|   |             |             |             |
|---|-------------|-------------|-------------|
| H | -3.17486900 | 2.16903800  | -2.12710300 |
| H | -4.85265400 | 3.99497600  | -1.92253500 |
| H | -5.17077000 | 5.16407100  | 0.25754500  |
| C | -1.58183800 | 1.23940400  | -0.17694600 |
| C | -0.77779000 | 0.33075300  | -0.26800300 |
| C | 0.17374400  | -0.78605800 | -0.39636500 |
| O | -1.01453400 | -4.15696500 | 0.03018400  |
| C | -0.84670000 | -4.72562600 | 1.33563400  |
| H | 0.04253800  | -4.31801500 | 1.84617000  |
| H | -1.72964300 | -4.55010000 | 1.96836700  |
| H | -0.70819600 | -5.80262100 | 1.18350600  |
| C | 1.54629600  | -0.28232400 | -0.27158300 |
| C | 2.68980500  | 0.12191700  | -0.16658200 |
| C | 4.02655800  | 0.60171000  | -0.02921500 |
| C | 4.99638100  | 0.33384600  | -1.02428700 |
| C | 4.40233100  | 1.35792200  | 1.10655200  |
| C | 6.30299700  | 0.80859800  | -0.88181300 |
| H | 4.71205700  | -0.24635800 | -1.90022000 |
| C | 5.71150000  | 1.82810500  | 1.23894900  |
| H | 3.65893000  | 1.56835500  | 1.87312100  |
| C | 6.66584300  | 1.55675600  | 0.24763400  |
| H | 7.03999900  | 0.59532200  | -1.65501100 |
| H | 5.98724100  | 2.40945900  | 2.11788000  |
| H | 7.68514100  | 1.92531500  | 0.35456900  |
| C | -0.07087500 | -1.55897300 | -1.74047800 |
| H | 0.77020700  | -2.25031600 | -1.88531800 |
| H | -0.12506500 | -0.87812500 | -2.59727900 |
| C | -1.37217100 | -2.32890800 | -1.47202300 |
| H | -2.22823500 | -1.65519200 | -1.59940800 |
| H | -1.50229900 | -3.19719900 | -2.12647100 |



|   |             |             |             |
|---|-------------|-------------|-------------|
| C | -1.29358700 | -2.75330000 | 0.02423000  |
| C | -0.14267700 | -1.91317600 | 0.64973400  |
| H | -0.40138800 | -1.51060700 | 1.63293400  |
| O | -2.46872900 | -2.45134500 | 0.77049300  |
| C | -3.66153500 | -3.07604500 | 0.27971200  |
| H | -4.45369800 | -2.82555100 | 0.99509400  |
| H | -3.94305500 | -2.69083500 | -0.71477100 |
| H | -3.54767200 | -4.16935600 | 0.21979000  |
| H | 0.75137100  | -2.54191200 | 0.73579600  |

**TS-S3**

0 1

|   |             |             |             |
|---|-------------|-------------|-------------|
| C | 3.58971400  | -3.72596200 | 0.36343300  |
| C | 4.39134200  | -2.60569700 | 0.71222500  |
| C | 5.59341800  | -2.81758800 | 1.41884600  |
| C | 6.00043700  | -4.09940400 | 1.79909300  |
| C | 5.19793500  | -5.20143800 | 1.48104100  |
| C | 4.00982200  | -5.00930700 | 0.77295700  |
| C | 2.32524000  | -3.63401800 | -0.41622400 |
| C | 1.14601200  | -4.20788000 | 0.09637700  |
| C | -0.04056800 | -4.17883400 | -0.64043000 |
| C | -0.06840500 | -3.57893400 | -1.90502600 |
| C | 1.09415200  | -2.99731400 | -2.42341100 |
| C | 2.28263900  | -3.02642200 | -1.68536200 |
| H | 6.21539100  | -1.97019200 | 1.69521100  |
| H | 6.93369200  | -4.23287700 | 2.34428000  |
| H | 5.49813000  | -6.20604100 | 1.77577600  |
| H | 3.39279600  | -5.86536100 | 0.50445000  |
| H | 1.16424300  | -4.66350500 | 1.08521300  |
| H | -0.94962300 | -4.60489400 | -0.22319000 |

|   |             |             |             |
|---|-------------|-------------|-------------|
| H | -0.99622800 | -3.55400900 | -2.47216400 |
| H | 1.08049300  | -2.52324500 | -3.40407400 |
| H | 3.18636000  | -2.59763600 | -2.10881200 |
| P | 3.87505900  | -0.87946100 | 0.31945900  |
| C | 4.82296400  | -0.46643700 | -1.24536000 |
| C | 4.08145200  | 0.59718000  | -2.08102400 |
| C | 6.29650900  | -0.08491500 | -0.98994000 |
| H | 4.82704800  | -1.40858100 | -1.81280000 |
| C | 4.82969700  | 0.87958900  | -3.39609900 |
| H | 3.99456100  | 1.52406400  | -1.50058100 |
| H | 3.05749900  | 0.25501700  | -2.28340000 |
| C | 7.02191700  | 0.19250800  | -2.32194700 |
| H | 6.34059900  | 0.81940000  | -0.36708000 |
| H | 6.80336100  | -0.89149400 | -0.44186500 |
| C | 6.29338700  | 1.27880500  | -3.13463000 |
| H | 4.30890700  | 1.67149900  | -3.95280600 |
| H | 4.80991900  | -0.02684400 | -4.02415500 |
| H | 8.06037700  | 0.49381400  | -2.12017200 |
| H | 7.06148600  | -0.73791000 | -2.91215600 |
| H | 6.81624400  | 1.45592100  | -4.08607600 |
| H | 6.31110100  | 2.22531100  | -2.57044000 |
| C | 4.59293800  | 0.16976300  | 1.68535500  |
| C | 4.31622400  | 1.66760300  | 1.41614800  |
| C | 3.97758800  | -0.26015000 | 3.03701200  |
| H | 5.68144200  | 0.02260200  | 1.71486900  |
| C | 4.86073900  | 2.53103500  | 2.56892200  |
| H | 3.23125500  | 1.82033800  | 1.32383800  |
| H | 4.76124200  | 1.98605800  | 0.46648200  |
| C | 4.50853300  | 0.61307700  | 4.18912000  |
| H | 2.88332600  | -0.15006100 | 2.96865500  |

|    |             |             |             |
|----|-------------|-------------|-------------|
| H  | 4.18576500  | -1.32008300 | 3.23407300  |
| C  | 4.25375200  | 2.10687200  | 3.91798300  |
| H  | 4.64397000  | 3.58764400  | 2.36317100  |
| H  | 5.95798700  | 2.42785900  | 2.61377800  |
| H  | 4.03393000  | 0.30611300  | 5.13252200  |
| H  | 5.59270200  | 0.44466900  | 4.30102000  |
| H  | 4.66576600  | 2.71943200  | 4.73345300  |
| H  | 3.16611600  | 2.28566000  | 3.89132700  |
| Au | 1.61204500  | -0.34230200 | 0.27344800  |
| C  | -4.73632400 | 5.76441200  | 1.91315600  |
| C  | -3.63576600 | 4.98320600  | 1.55169200  |
| C  | -3.70009000 | 4.14942200  | 0.41046200  |
| C  | -4.88728900 | 4.12106800  | -0.35763100 |
| C  | -5.98259600 | 4.90300300  | 0.01648600  |
| C  | -5.91216400 | 5.72664100  | 1.14920600  |
| H  | -4.67766000 | 6.40222300  | 2.79413200  |
| H  | -2.72228000 | 5.00516700  | 2.14308200  |
| H  | -4.94084800 | 3.46965500  | -1.22564700 |
| H  | -6.89585200 | 4.86398300  | -0.57475700 |
| H  | -6.76946000 | 6.33374900  | 1.43681900  |
| C  | -2.58726000 | 3.33187700  | 0.04891800  |
| C  | -1.64898400 | 2.61077400  | -0.24927600 |
| C  | -0.51589900 | 1.72340000  | -0.58288400 |
| O  | -1.42609800 | -1.69025100 | 0.58627100  |
| C  | -1.10485400 | -1.87524700 | 1.97619600  |
| H  | -0.05003400 | -1.62631900 | 2.16780800  |
| H  | -1.75997400 | -1.26783300 | 2.61370900  |
| H  | -1.27709500 | -2.93541200 | 2.18382000  |
| C  | 0.67380900  | 2.56740500  | -0.73896200 |
| C  | 1.66429600  | 3.26131100  | -0.87757500 |

|   |             |             |             |
|---|-------------|-------------|-------------|
| C | 2.85945100  | 4.01942000  | -1.03560500 |
| C | 3.51533600  | 4.07190800  | -2.28845100 |
| C | 3.43400900  | 4.70014300  | 0.06312500  |
| C | 4.71643100  | 4.77122500  | -2.42969200 |
| H | 3.07838400  | 3.55009700  | -3.13667400 |
| C | 4.63514300  | 5.39791300  | -0.08751700 |
| H | 2.93399400  | 4.66430400  | 1.02831700  |
| C | 5.28408600  | 5.43294300  | -1.33053200 |
| H | 5.21203800  | 4.79746500  | -3.39913700 |
| H | 5.06830700  | 5.91367600  | 0.76854500  |
| H | 6.22146500  | 5.97578400  | -1.44339600 |
| C | -0.82343600 | 0.88284200  | -1.87733300 |
| H | 0.14372200  | 0.55868500  | -2.27937900 |
| H | -1.34437000 | 1.48214100  | -2.63178700 |
| C | -1.63647800 | -0.34060100 | -1.39357300 |
| H | -2.69259200 | -0.26702300 | -1.66594500 |
| H | -1.23186200 | -1.26782000 | -1.80669700 |
| C | -1.47232000 | -0.38872200 | 0.14066600  |
| C | -0.33031100 | 0.56484500  | 0.48291900  |
| H | -0.42415900 | 0.95831900  | 1.50413800  |
| O | -2.78723300 | 0.15051500  | 0.80326600  |
| H | -2.85202600 | 1.10480200  | 0.59159200  |
| N | -4.82966100 | -1.03605500 | -0.02541700 |
| S | -5.21522900 | -2.55883500 | 0.57628500  |
| S | -5.82622200 | -0.06360200 | -0.95591800 |
| O | -6.65571500 | -2.78918200 | 0.65246800  |
| O | -4.32362100 | -2.79045800 | 1.71129400  |
| O | -4.93117600 | 0.92086900  | -1.57273800 |
| O | -6.81178300 | -0.81300900 | -1.72921200 |
| C | -4.56733000 | -3.68269500 | -0.84169200 |

|   |             |             |             |
|---|-------------|-------------|-------------|
| C | -6.78862300 | 0.91902400  | 0.38921600  |
| F | -5.22935800 | -3.42965900 | -1.97558900 |
| F | -3.25885200 | -3.46657000 | -1.03462100 |
| F | -4.75668500 | -4.96325600 | -0.48642300 |
| F | -5.91183500 | 1.49138300  | 1.22791100  |
| F | -7.51663700 | 1.86953000  | -0.21664600 |
| F | -7.59570100 | 0.10596200  | 1.07498500  |
| H | -3.82114700 | -0.48346900 | 0.38129300  |

**IM-S2**

0 1

|   |             |             |             |
|---|-------------|-------------|-------------|
| C | 3.41235000  | -3.74880100 | 0.11733300  |
| C | 4.26082400  | -2.71096900 | 0.58586800  |
| C | 5.41547100  | -3.04897400 | 1.32097100  |
| C | 5.72782300  | -4.37893900 | 1.61637100  |
| C | 4.87303200  | -5.40099500 | 1.18670100  |
| C | 3.73240000  | -5.08277600 | 0.44588400  |
| C | 2.20848100  | -3.51543300 | -0.72645700 |
| C | 0.95957100  | -4.02605100 | -0.32743700 |
| C | -0.16540700 | -3.87401900 | -1.14200500 |
| C | -0.05917200 | -3.21328900 | -2.37195800 |
| C | 1.17516800  | -2.68900900 | -2.77504700 |
| C | 2.30048900  | -2.83876800 | -1.95747600 |
| H | 6.07253800  | -2.26451000 | 1.68802100  |
| H | 6.62653900  | -4.61126800 | 2.18597000  |
| H | 5.09767800  | -6.44125600 | 1.41822100  |
| H | 3.07816700  | -5.87553200 | 0.08660200  |
| H | 0.87507700  | -4.53063600 | 0.63367700  |
| H | -1.12703600 | -4.25494000 | -0.81068900 |
| H | -0.93648900 | -3.10029600 | -3.00663900 |

|   |            |             |             |
|---|------------|-------------|-------------|
| H | 1.26569500 | -2.16922100 | -3.72811600 |
| H | 3.26170700 | -2.45522900 | -2.28835600 |
| P | 3.84284300 | -0.93366600 | 0.33105700  |
| C | 4.88912900 | -0.41859300 | -1.13704500 |
| C | 4.22900200 | 0.73727300  | -1.91704400 |
| C | 6.35760100 | -0.10864800 | -0.77652400 |
| H | 4.89706800 | -1.30825300 | -1.78383300 |
| C | 5.04969700 | 1.08453900  | -3.17181400 |
| H | 4.15620400 | 1.62251700  | -1.27309400 |
| H | 3.20130400 | 0.45867900  | -2.18670900 |
| C | 7.16201000 | 0.24305500  | -2.04422600 |
| H | 6.39505800 | 0.74320400  | -0.08335300 |
| H | 6.81001900 | -0.97099700 | -0.26668700 |
| C | 6.51094400 | 1.40905100  | -2.81214800 |
| H | 4.58596900 | 1.93592100  | -3.68880200 |
| H | 5.02865700 | 0.22723700  | -3.86582800 |
| H | 8.19650400 | 0.49414600  | -1.76674300 |
| H | 7.20616400 | -0.64290600 | -2.69887300 |
| H | 7.08746600 | 1.63284600  | -3.72190400 |
| H | 6.52938800 | 2.31400200  | -2.18362300 |
| C | 4.53814600 | -0.05539900 | 1.82346000  |
| C | 4.31933600 | 1.46949200  | 1.69100600  |
| C | 3.85478700 | -0.58405500 | 3.10471300  |
| H | 5.61924100 | -0.24666400 | 1.87707300  |
| C | 4.85435500 | 2.20386700  | 2.93396100  |
| H | 3.24213300 | 1.66623300  | 1.58747400  |
| H | 4.79950100 | 1.85948600  | 0.78664600  |
| C | 4.37395400 | 0.15694700  | 4.35177200  |
| H | 2.76892200 | -0.42414900 | 3.00708400  |
| H | 4.01647800 | -1.66483600 | 3.20965600  |

|    |             |             |             |
|----|-------------|-------------|-------------|
| C  | 4.18731900  | 1.67945000  | 4.21823900  |
| H  | 4.67965800  | 3.28380200  | 2.82435700  |
| H  | 5.94529000  | 2.05654600  | 3.00236100  |
| H  | 3.85327200  | -0.21696000 | 5.24544300  |
| H  | 5.44608600  | -0.06612700 | 4.48385900  |
| H  | 4.59664900  | 2.19307300  | 5.10058700  |
| H  | 3.10915700  | 1.90629300  | 4.17846700  |
| Au | 1.60644200  | -0.30070400 | 0.23857700  |
| C  | -4.65047800 | 6.04128200  | 1.75147900  |
| C  | -3.53776400 | 5.26855500  | 1.40876000  |
| C  | -3.64845800 | 4.26441900  | 0.41827600  |
| C  | -4.89480100 | 4.05846400  | -0.21936100 |
| C  | -6.00169900 | 4.83310200  | 0.13636700  |
| C  | -5.88425600 | 5.82621600  | 1.11950000  |
| H  | -4.55594800 | 6.81211300  | 2.51524000  |
| H  | -2.57959400 | 5.42854100  | 1.89951700  |
| H  | -4.98032900 | 3.28602400  | -0.97887500 |
| H  | -6.95782600 | 4.65884600  | -0.35468500 |
| H  | -6.74930600 | 6.42891300  | 1.39297800  |
| C  | -2.52307400 | 3.45866600  | 0.06862500  |
| C  | -1.57948600 | 2.74408300  | -0.22894100 |
| C  | -0.46460300 | 1.83945100  | -0.57774500 |
| O  | -1.46902400 | -1.58901400 | 0.48015100  |
| C  | -1.13085600 | -1.86313400 | 1.84964100  |
| H  | -0.07891000 | -1.61010500 | 2.05294100  |
| H  | -1.79078900 | -1.31633300 | 2.53503700  |
| H  | -1.28030200 | -2.93861300 | 1.98544400  |
| C  | 0.74828500  | 2.65171100  | -0.71985000 |
| C  | 1.76448700  | 3.30945100  | -0.84847600 |
| C  | 2.99043900  | 4.02029400  | -0.99115300 |

|   |             |             |             |
|---|-------------|-------------|-------------|
| C | 3.51323700  | 4.30558000  | -2.27484700 |
| C | 3.72946500  | 4.41558800  | 0.14888400  |
| C | 4.74206400  | 4.95678200  | -2.40861300 |
| H | 2.94858300  | 4.00415700  | -3.15479500 |
| C | 4.95805500  | 5.06528500  | 0.00529900  |
| H | 3.33435900  | 4.19565500  | 1.13766600  |
| C | 5.47133800  | 5.33610300  | -1.27173400 |
| H | 5.13439500  | 5.16564200  | -3.40301300 |
| H | 5.51757900  | 5.35874600  | 0.89268100  |
| H | 6.42974200  | 5.84174700  | -1.38071100 |
| C | -0.80288100 | 1.03454000  | -1.88415400 |
| H | 0.14727800  | 0.64897200  | -2.27204300 |
| H | -1.27147800 | 1.67155900  | -2.64268200 |
| C | -1.70122300 | -0.13152500 | -1.41643000 |
| H | -2.75305900 | 0.04784800  | -1.65286900 |
| H | -1.39370100 | -1.07324700 | -1.87704000 |
| C | -1.51121400 | -0.24593000 | 0.11726300  |
| C | -0.30927700 | 0.65044900  | 0.46134300  |
| H | -0.38802000 | 1.03114200  | 1.48951100  |
| O | -2.74471100 | 0.26924200  | 0.83050900  |
| H | -2.78728700 | 1.23219300  | 0.67901200  |
| N | -4.89370500 | -0.97643300 | 0.13087000  |
| S | -5.11147100 | -2.53826400 | 0.74427500  |
| S | -5.89904100 | -0.17970800 | -0.95420200 |
| O | -6.52832200 | -2.87283600 | 0.83441900  |
| O | -4.19876900 | -2.64788300 | 1.87717900  |
| O | -5.07928900 | 0.85033900  | -1.59396200 |
| O | -6.71465300 | -1.12357800 | -1.71154700 |
| C | -4.36395500 | -3.64524000 | -0.68130400 |
| C | -7.05645900 | 0.78158400  | 0.24617300  |



|   |             |             |             |
|---|-------------|-------------|-------------|
| F | -5.35768700 | -4.18106900 | -1.39265500 |
| F | -3.57873700 | -2.92117900 | -1.48636400 |
| F | -3.64140000 | -4.62139100 | -0.11254100 |
| F | -6.30485100 | 1.43960600  | 1.13803000  |
| F | -7.77306700 | 1.65902300  | -0.47195800 |
| F | -7.87371300 | -0.06128100 | 0.87786700  |
| H | -3.95884100 | -0.44280100 | 0.42170700  |

**TS-S4**

0 1

|   |            |             |             |
|---|------------|-------------|-------------|
| C | 4.33954100 | -1.38393900 | -0.79817600 |
| C | 4.15913800 | -0.17984800 | -0.06218300 |
| C | 5.10765200 | 0.17604300  | 0.91967000  |
| C | 6.20878100 | -0.63434800 | 1.20368700  |
| C | 6.37623700 | -1.83355900 | 0.50434700  |
| C | 5.45574000 | -2.19051400 | -0.48141400 |
| C | 3.47401300 | -1.85980800 | -1.91288800 |
| C | 3.10858200 | -3.22062600 | -1.97585500 |
| C | 2.45180900 | -3.73495800 | -3.09584300 |
| C | 2.12115500 | -2.89981300 | -4.16972400 |
| C | 2.44954100 | -1.54238000 | -4.11000300 |
| C | 3.12089000 | -1.02952300 | -2.99486700 |
| H | 4.98216300 | 1.08790000  | 1.49614600  |
| H | 6.91946800 | -0.33177700 | 1.97103900  |
| H | 7.22415200 | -2.48339700 | 0.71583500  |
| H | 5.60537800 | -3.10851900 | -1.04646000 |
| H | 3.34134200 | -3.87046600 | -1.13523400 |
| H | 2.18215400 | -4.78949800 | -3.12316100 |
| H | 1.59959800 | -3.30173500 | -5.03636300 |
| H | 2.20083900 | -0.87976900 | -4.93813100 |

|   |            |            |             |
|---|------------|------------|-------------|
| H | 3.42361200 | 0.01099700 | -3.00108500 |
| P | 2.69699000 | 0.91232900 | -0.27028200 |
| C | 3.19207100 | 2.19974700 | -1.54753200 |
| C | 1.97241700 | 2.60942000 | -2.40014400 |
| C | 3.94871700 | 3.41493600 | -0.96413800 |
| H | 3.90890500 | 1.68061500 | -2.19819300 |
| C | 2.36428400 | 3.62305000 | -3.48969400 |
| H | 1.19693900 | 3.03834400 | -1.75000800 |
| H | 1.53835900 | 1.70829600 | -2.85512200 |
| C | 4.32923600 | 4.39820000 | -2.09039700 |
| H | 3.32070600 | 3.94230100 | -0.23513400 |
| H | 4.85109700 | 3.07460500 | -0.43710500 |
| C | 3.08802500 | 4.84044000 | -2.88705000 |
| H | 1.46578300 | 3.93799500 | -4.04002300 |
| H | 3.03416600 | 3.13046300 | -4.21403500 |
| H | 4.83998800 | 5.26988500 | -1.65622400 |
| H | 5.04203600 | 3.90893700 | -2.77405300 |
| H | 3.37720900 | 5.54333100 | -3.68149700 |
| H | 2.39790800 | 5.37590200 | -2.21359800 |
| C | 2.48471400 | 1.82506700 | 1.33139400  |
| C | 1.31847900 | 2.83195000 | 1.24458700  |
| C | 2.22011800 | 0.86100800 | 2.50631300  |
| H | 3.41051600 | 2.38880100 | 1.51172600  |
| C | 1.27280300 | 3.66980900 | 2.53613000  |
| H | 0.38408000 | 2.27123400 | 1.12190200  |
| H | 1.40653000 | 3.49152500 | 0.37518800  |
| C | 2.15584700 | 1.65016200 | 3.82853200  |
| H | 1.25853200 | 0.36361100 | 2.32326900  |
| H | 2.98505100 | 0.07899200 | 2.56770100  |
| C | 1.10449300 | 2.77704700 | 3.77957500  |

|    |              |             |             |
|----|--------------|-------------|-------------|
| H  | 0.45189800   | 4.39358500  | 2.47395700  |
| H  | 2.21201200   | 4.24318500  | 2.61835900  |
| H  | 1.93490000   | 0.95907000  | 4.65346500  |
| H  | 3.14923400   | 2.08691800  | 4.02640600  |
| H  | 1.16395700   | 3.38657800  | 4.69345100  |
| H  | 0.10283600   | 2.33058000  | 3.75626800  |
| Au | 0.66154400   | -0.12691900 | -0.71602100 |
| C  | -8.20246500  | -1.18165600 | -1.01910300 |
| C  | -6.82050100  | -0.97625900 | -1.00570700 |
| C  | -6.25651200  | 0.12193300  | -1.69916500 |
| C  | -7.11367100  | 1.00399100  | -2.39875600 |
| C  | -8.49456500  | 0.78872900  | -2.40511700 |
| C  | -9.04440800  | -0.30298600 | -1.71735200 |
| H  | -8.62458700  | -2.03004700 | -0.48159600 |
| H  | -6.16178200  | -1.65245300 | -0.46444300 |
| H  | -6.68398400  | 1.85166300  | -2.92977900 |
| H  | -9.14392300  | 1.47551600  | -2.94709200 |
| H  | -10.12121900 | -0.46716600 | -1.72423000 |
| C  | -4.84615200  | 0.32182600  | -1.68791200 |
| C  | -3.63409500  | 0.42191100  | -1.67566700 |
| C  | -2.17360500  | 0.60261100  | -1.61278400 |
| O  | -0.45695100  | -2.58575900 | -2.56119500 |
| C  | -0.39201000  | -3.50830000 | -1.46353200 |
| H  | 0.17524300   | -3.06484400 | -0.63971700 |
| H  | -1.39660200  | -3.79841900 | -1.13093400 |
| H  | 0.14280600   | -4.39270900 | -1.82414300 |
| C  | -1.94151400  | 1.78532400  | -0.77535300 |
| C  | -1.84645400  | 2.82651500  | -0.15236100 |
| C  | -1.72880400  | 4.01826700  | 0.61759100  |
| C  | -1.04288600  | 5.14345800  | 0.10318300  |

|   |             |             |             |
|---|-------------|-------------|-------------|
| C | -2.29076500 | 4.09299900  | 1.91392600  |
| C | -0.92209600 | 6.30696600  | 0.86713000  |
| H | -0.61239200 | 5.09185600  | -0.89526400 |
| C | -2.16775900 | 5.26261300  | 2.66858600  |
| H | -2.81070000 | 3.22714600  | 2.31576500  |
| C | -1.48442100 | 6.37254700  | 2.15073400  |
| H | -0.38994000 | 7.16587400  | 0.45994100  |
| H | -2.60441700 | 5.30626700  | 3.66536800  |
| H | -1.38802700 | 7.28118600  | 2.74326800  |
| C | -1.57165000 | 0.80598800  | -3.05561500 |
| H | -0.62933900 | 1.35346400  | -2.93853000 |
| H | -2.24774100 | 1.40653200  | -3.67325100 |
| C | -1.30107100 | -0.60697100 | -3.61800300 |
| H | -2.00203100 | -0.86768900 | -4.42101700 |
| H | -0.28194500 | -0.68169100 | -4.01147900 |
| C | -1.46934200 | -1.60799000 | -2.44174700 |
| C | -1.46728900 | -0.74546500 | -1.14137200 |
| H | -2.13648800 | -1.22609700 | -0.42569000 |
| O | -2.75684700 | -2.23790700 | -2.46420700 |
| N | -0.68119900 | -1.78131800 | 1.53470700  |
| S | -2.07552400 | -1.63966400 | 2.44398300  |
| S | 0.64787200  | -2.60444300 | 2.14518000  |
| O | -2.17615200 | -2.63681000 | 3.51333800  |
| O | -3.18557600 | -1.40915100 | 1.51499400  |
| O | 1.72550000  | -2.44407500 | 1.16207500  |
| O | 0.90594800  | -2.35457900 | 3.56594600  |
| C | -1.81898900 | 0.06360000  | 3.29045600  |
| C | 0.11318600  | -4.49440600 | 2.01390500  |
| F | -0.87828700 | -0.00543100 | 4.23907100  |
| F | -1.44341000 | 0.95721800  | 2.35749300  |

|   |             |             |             |
|---|-------------|-------------|-------------|
| F | -2.97507400 | 0.46798800  | 3.84095700  |
| F | 1.04978800  | -5.14818800 | 1.30378200  |
| F | 0.03525100  | -5.02608000 | 3.23517600  |
| F | -1.06806200 | -4.62587500 | 1.39272900  |
| H | -0.61978100 | -1.09265800 | 0.19462400  |
| H | -2.84842300 | -2.63494100 | -3.34301000 |

**D'**

0 1

|   |             |             |             |
|---|-------------|-------------|-------------|
| C | -3.85510000 | -3.72915200 | -1.14160100 |
| C | -2.89644300 | -2.71317200 | -1.10296500 |
| C | -2.65126000 | -2.00731500 | 0.09879300  |
| C | -3.39400000 | -2.34637000 | 1.25493600  |
| C | -4.35145300 | -3.36298400 | 1.20512400  |
| C | -4.58616300 | -4.05756600 | 0.00947100  |
| H | -4.03300000 | -4.26560400 | -2.07281000 |
| H | -2.32827100 | -2.45495700 | -1.99460600 |
| H | -3.20870100 | -1.80677300 | 2.18203600  |
| H | -4.91654200 | -3.61413600 | 2.10193500  |
| H | -5.33324500 | -4.84943000 | -0.02471100 |
| C | -1.67599400 | -0.96727100 | 0.14464600  |
| C | -0.84834200 | -0.07604900 | 0.18205700  |
| C | 0.13986400  | 1.01386700  | 0.25105200  |
| O | -0.77886300 | 4.41378400  | -0.33569300 |
| C | 1.49479900  | 0.45654100  | 0.17102900  |
| C | 2.62559200  | 0.01079100  | 0.10326400  |
| C | 3.94741600  | -0.51817600 | 0.00807400  |
| C | 4.90028200  | -0.26939600 | 1.02429600  |
| C | 4.32635200  | -1.30114000 | -1.10835000 |
| C | 6.19292600  | -0.79058200 | 0.92230400  |

|             |             |             |             |
|-------------|-------------|-------------|-------------|
| H           | 4.61355600  | 0.33207200  | 1.88498700  |
| C           | 5.62150800  | -1.81756700 | -1.20038300 |
| H           | 3.59621100  | -1.49608400 | -1.89155300 |
| C           | 6.55883800  | -1.56555600 | -0.18792800 |
| H           | 6.91681700  | -0.59194500 | 1.71159100  |
| H           | 5.89980900  | -2.41924000 | -2.06472100 |
| H           | 7.56709800  | -1.97041600 | -0.26337300 |
| C           | -0.08984100 | 1.87041400  | 1.54790600  |
| H           | 0.77533600  | 2.53614300  | 1.66800900  |
| H           | -0.18225200 | 1.24019500  | 2.43944200  |
| C           | -1.35488100 | 2.67559300  | 1.21750300  |
| H           | -2.23867500 | 2.03610900  | 1.33271300  |
| H           | -1.47491400 | 3.56624800  | 1.84334300  |
| C           | -1.20724100 | 3.04909200  | -0.28380200 |
| C           | -0.13077400 | 2.08661300  | -0.86605400 |
| H           | -0.44905800 | 1.63255400  | -1.80913600 |
| O           | -2.38613800 | 2.85478600  | -1.05728000 |
| C           | -3.52851400 | 3.59245600  | -0.60143400 |
| H           | -4.32425400 | 3.40549900  | -1.33212300 |
| H           | -3.86574800 | 3.24658700  | 0.39047500  |
| H           | -3.31475000 | 4.67101400  | -0.55400800 |
| H           | 0.79789000  | 2.64808200  | -1.02233200 |
| H           | -0.60270500 | 4.60710600  | -1.26901600 |
| <b>TS4'</b> |             |             |             |
| 0 1         |             |             |             |
| C           | 3.54848900  | -3.36085800 | -0.50594200 |
| C           | 4.19995800  | -2.25592500 | 0.10330000  |
| C           | 5.39319100  | -2.47800100 | 0.82179400  |
| C           | 5.93317900  | -3.76008600 | 0.95687100  |
| C           | 5.27422700  | -4.85327400 | 0.38252200  |

|   |             |             |             |
|---|-------------|-------------|-------------|
| C | 4.09452200  | -4.64837000 | -0.33739900 |
| C | 2.30511500  | -3.22526000 | -1.31308500 |
| C | 1.10473500  | -3.80088500 | -0.85829000 |
| C | -0.08155200 | -3.62729300 | -1.58067800 |
| C | -0.08123400 | -2.88091400 | -2.76673000 |
| C | 1.11369900  | -2.31830800 | -3.23387400 |
| C | 2.30157900  | -2.49345000 | -2.51496100 |
| H | 5.90405800  | -1.64541700 | 1.29843200  |
| H | 6.85714200  | -3.90186700 | 1.51544600  |
| H | 5.67811900  | -5.85898200 | 0.48925200  |
| H | 3.58312800  | -5.49130300 | -0.79955900 |
| H | 1.09957700  | -4.34885000 | 0.08245500  |
| H | -1.00786800 | -4.05934200 | -1.20829500 |
| H | -1.00926900 | -2.72236200 | -3.30969600 |
| H | 1.11878300  | -1.73854800 | -4.15578500 |
| H | 3.22865300  | -2.05050200 | -2.87426800 |
| P | 3.51922900  | -0.53944500 | 0.05609800  |
| C | 4.49786500  | 0.32599800  | -1.27418000 |
| C | 3.70961400  | 1.50590000  | -1.87920600 |
| C | 5.90926100  | 0.75364400  | -0.81820200 |
| H | 4.60819000  | -0.44690500 | -2.05059400 |
| C | 4.49334200  | 2.13106000  | -3.04649000 |
| H | 3.53684700  | 2.26779700  | -1.10930900 |
| H | 2.72047400  | 1.15963800  | -2.21071300 |
| C | 6.68068800  | 1.39815500  | -1.98815700 |
| H | 5.81992900  | 1.48434900  | -0.00054700 |
| H | 6.46538400  | -0.11263400 | -0.43344500 |
| C | 5.89712200  | 2.57543400  | -2.59793700 |
| H | 3.93197700  | 2.98486700  | -3.44858700 |
| H | 4.58770800  | 1.38829100  | -3.85621800 |

|    |             |             |             |
|----|-------------|-------------|-------------|
| H  | 7.66772700  | 1.73309900  | -1.63695300 |
| H  | 6.85344900  | 0.63564800  | -2.76516000 |
| H  | 6.45309600  | 2.99987700  | -3.44673000 |
| H  | 5.79365500  | 3.37203700  | -1.84382300 |
| C  | 3.93879800  | 0.19341400  | 1.71405500  |
| C  | 3.48500200  | 1.66803900  | 1.77436000  |
| C  | 3.24919000  | -0.64197400 | 2.81949500  |
| H  | 5.02827100  | 0.16058900  | 1.85159800  |
| C  | 3.76121300  | 2.25598900  | 3.17101200  |
| H  | 2.40727500  | 1.72207000  | 1.56077500  |
| H  | 3.99404200  | 2.26122100  | 1.00590800  |
| C  | 3.49677700  | -0.03471600 | 4.21300400  |
| H  | 2.16695200  | -0.65935300 | 2.61758900  |
| H  | 3.60076900  | -1.68159700 | 2.78952900  |
| C  | 3.05401500  | 1.43791900  | 4.26504800  |
| H  | 3.43112400  | 3.30263600  | 3.20129300  |
| H  | 4.84795700  | 2.25341300  | 3.35934600  |
| H  | 2.96074300  | -0.62705700 | 4.96885200  |
| H  | 4.57141300  | -0.09874400 | 4.45176500  |
| H  | 3.25811900  | 1.86510900  | 5.25751800  |
| H  | 1.96549600  | 1.49315200  | 4.09992700  |
| Au | 1.24195900  | -0.37803100 | -0.16909900 |
| C  | -5.99689100 | 6.48436600  | 0.65904900  |
| C  | -4.81671500 | 5.73571600  | 0.68008900  |
| C  | -4.84903200 | 4.34419900  | 0.42487400  |
| C  | -6.09298000 | 3.72819200  | 0.14644700  |
| C  | -7.26660800 | 4.48608200  | 0.12922900  |
| C  | -7.22490000 | 5.86454700  | 0.38512100  |
| H  | -5.95837100 | 7.55472800  | 0.85839900  |
| H  | -3.86235500 | 6.21412200  | 0.89277500  |



|   |             |             |             |
|---|-------------|-------------|-------------|
| H | -6.12205600 | 2.65966600  | -0.05256500 |
| H | -8.21717500 | 3.99833900  | -0.08376600 |
| H | -8.14269800 | 6.45099100  | 0.37136300  |
| C | -3.65284700 | 3.56728700  | 0.44679700  |
| C | -2.64834800 | 2.87987400  | 0.46217500  |
| C | -1.47248600 | 1.99648900  | 0.46884400  |
| C | -0.25128300 | 2.80058500  | 0.25848300  |
| C | 0.73170000  | 3.48542400  | 0.03766500  |
| C | 1.87190400  | 4.29557900  | -0.23217900 |
| C | 2.25369100  | 4.57804300  | -1.56511100 |
| C | 2.64938400  | 4.82301500  | 0.82454600  |
| C | 3.38788900  | 5.35066000  | -1.82658300 |
| H | 1.65628500  | 4.17806500  | -2.38174700 |
| C | 3.78681300  | 5.58819100  | 0.55453500  |
| H | 2.34956000  | 4.62218600  | 1.84986700  |
| C | 4.16360100  | 5.85172400  | -0.77081700 |
| H | 3.67137200  | 5.55818500  | -2.85724100 |
| H | 4.37852700  | 5.98252900  | 1.37987600  |
| H | 5.05003200  | 6.44897200  | -0.97966600 |
| C | -1.60244400 | 0.89534100  | -0.66985800 |
| H | -1.09100900 | 1.20604400  | -1.58364000 |
| H | -2.66854200 | 0.77543700  | -0.89040800 |
| C | -1.03202900 | -0.37032900 | -0.01183600 |
| H | -0.73465400 | -1.30382600 | -0.52092700 |
| C | -1.06944500 | -0.12305100 | 1.45494900  |
| C | -1.37414100 | 1.16101400  | 1.75504100  |
| H | -2.19469100 | -1.17518700 | -0.08329000 |
| O | -0.79815500 | -1.16557600 | 2.27106100  |
| N | -3.32752200 | -1.79524700 | -0.21975800 |
| S | -4.11997100 | -2.45344100 | 1.10340300  |

|                        |             |             |             |
|------------------------|-------------|-------------|-------------|
| S                      | -3.99508200 | -1.78610900 | -1.75873200 |
| O                      | -5.53317100 | -2.71718200 | 0.82180500  |
| O                      | -3.70062300 | -1.72912100 | 2.30133800  |
| O                      | -2.95275000 | -1.20928000 | -2.61468200 |
| O                      | -4.66325000 | -3.03505200 | -2.12402600 |
| C                      | -3.24968200 | -4.16089200 | 1.21862500  |
| C                      | -5.39151700 | -0.41371800 | -1.62069000 |
| F                      | -3.45031100 | -4.86686300 | 0.09759700  |
| F                      | -1.92903700 | -3.98644700 | 1.39726800  |
| F                      | -3.75291100 | -4.83276300 | 2.26542200  |
| F                      | -5.23813700 | 0.45550000  | -2.62889600 |
| F                      | -6.59647100 | -0.97948600 | -1.69924700 |
| F                      | -5.28086600 | 0.24565200  | -0.45543700 |
| H                      | -1.46992900 | 1.60797700  | 2.73618800  |
| C                      | -0.87480600 | -0.88702100 | 3.67812000  |
| H                      | -0.62769300 | -1.82529100 | 4.18545900  |
| H                      | -0.15076600 | -0.10435100 | 3.95490600  |
| H                      | -1.89101700 | -0.56925600 | 3.94793800  |
| <b>C<sub>DCE</sub></b> |             |             |             |
| 0 1                    |             |             |             |
| C                      | 4.03937100  | -2.40123400 | -1.54883400 |
| C                      | 4.15263600  | -1.71024100 | -0.31456700 |
| C                      | 5.02323300  | -2.20873300 | 0.67646300  |
| C                      | 5.75365900  | -3.38359700 | 0.47312800  |
| C                      | 5.60878400  | -4.09137600 | -0.72648600 |
| C                      | 4.76058700  | -3.59980000 | -1.72275100 |
| C                      | 3.21226800  | -1.91430500 | -2.68563700 |
| C                      | 2.17801600  | -2.71762300 | -3.20197600 |
| C                      | 1.41395100  | -2.27868900 | -4.28800100 |
| C                      | 1.66869200  | -1.03005100 | -4.87034500 |

|   |            |             |             |
|---|------------|-------------|-------------|
| C | 2.69265100 | -0.22117400 | -4.36136700 |
| C | 3.46511000 | -0.66357400 | -3.28067200 |
| H | 5.12058500 | -1.68925400 | 1.62576800  |
| H | 6.41920000 | -3.74803900 | 1.25410800  |
| H | 6.15922100 | -5.01672100 | -0.89040400 |
| H | 4.66159300 | -4.13422000 | -2.66628500 |
| H | 1.96865000 | -3.67967100 | -2.73715300 |
| H | 0.60939800 | -2.90410400 | -4.66924700 |
| H | 1.06663600 | -0.68800900 | -5.71013900 |
| H | 2.89751500 | 0.75032600  | -4.80944100 |
| H | 4.27419000 | -0.04355700 | -2.90343100 |
| P | 3.12898900 | -0.23236900 | 0.08047800  |
| C | 4.21708700 | 1.24720200  | -0.27640100 |
| C | 3.37880100 | 2.49080600  | -0.64167900 |
| C | 5.21559300 | 1.53293800  | 0.86658700  |
| H | 4.79608500 | 0.94658100  | -1.16064900 |
| C | 4.28584300 | 3.69273400  | -0.96141600 |
| H | 2.71713700 | 2.74040700  | 0.19614000  |
| H | 2.73183700 | 2.25993600  | -1.49945500 |
| C | 6.11713800 | 2.72971800  | 0.50425300  |
| H | 4.66165500 | 1.77107300  | 1.78545900  |
| H | 5.82538300 | 0.64097600  | 1.06641100  |
| C | 5.27317800 | 3.97704500  | 0.18503300  |
| H | 3.66243000 | 4.57713600  | -1.16059300 |
| H | 4.85432600 | 3.47845100  | -1.88163200 |
| H | 6.80679100 | 2.93407200  | 1.33626800  |
| H | 6.72918500 | 2.46892200  | -0.37479200 |
| H | 5.92589300 | 4.82269000  | -0.07750900 |
| H | 4.70669600 | 4.26495600  | 1.08487200  |
| C | 2.83282000 | -0.30347500 | 1.91370300  |

|    |             |             |             |
|----|-------------|-------------|-------------|
| C  | 2.00625100  | 0.91916700  | 2.37369100  |
| C  | 2.10410700  | -1.61534300 | 2.27922000  |
| H  | 3.80966300  | -0.27076800 | 2.41579800  |
| C  | 1.74914400  | 0.84712000  | 3.89058700  |
| H  | 1.04607800  | 0.92106500  | 1.83841300  |
| H  | 2.51763400  | 1.85596300  | 2.12540900  |
| C  | 1.83551100  | -1.67999700 | 3.79508500  |
| H  | 1.15108800  | -1.64209900 | 1.73642300  |
| H  | 2.69039500  | -2.48659400 | 1.96121500  |
| C  | 1.02848800  | -0.45825100 | 4.26910800  |
| H  | 1.15780600  | 1.71951800  | 4.19734400  |
| H  | 2.71504700  | 0.90023700  | 4.42083000  |
| H  | 1.30281700  | -2.60951100 | 4.03313600  |
| H  | 2.80027800  | -1.70748500 | 4.32937600  |
| H  | 0.86728700  | -0.50585400 | 5.35661600  |
| H  | 0.04118800  | -0.47547200 | 3.78458900  |
| Au | 1.06736100  | -0.04552600 | -0.94568500 |
| C  | -7.27539600 | 3.23776100  | -0.24946500 |
| C  | -5.88057600 | 3.21546600  | -0.33295600 |
| C  | -5.24448800 | 2.60493100  | -1.43952800 |
| C  | -6.03688500 | 2.01796600  | -2.45411300 |
| C  | -7.43103000 | 2.04598300  | -2.36012200 |
| C  | -8.05464800 | 2.65418700  | -1.25997200 |
| H  | -7.75521700 | 3.70543500  | 0.60910600  |
| H  | -5.27181300 | 3.65389900  | 0.45529200  |
| H  | -5.54952500 | 1.53582900  | -3.29934900 |
| H  | -8.03251200 | 1.58668000  | -3.14339800 |
| H  | -9.14125300 | 2.66952100  | -1.18865600 |
| C  | -3.82257600 | 2.52622500  | -1.49637700 |
| C  | -2.61079000 | 2.41065600  | -1.50446200 |

|   |             |             |             |
|---|-------------|-------------|-------------|
| C | -1.17136100 | 2.10202700  | -1.44451600 |
| O | -1.21900200 | -1.01558800 | -3.33711500 |
| C | -1.42092100 | -2.13788600 | -2.42586200 |
| H | -0.52036600 | -2.25783500 | -1.81391600 |
| H | -2.29463600 | -1.95201200 | -1.79471700 |
| H | -1.58114800 | -3.01006400 | -3.06351600 |
| C | -0.57442700 | 2.77206200  | -0.28453700 |
| C | -0.07699900 | 3.36549800  | 0.65391500  |
| C | 0.52293500  | 4.03365600  | 1.76078400  |
| C | 1.69035900  | 4.81391300  | 1.58171900  |
| C | -0.03074700 | 3.90930800  | 3.05621400  |
| C | 2.29071800  | 5.44180100  | 2.67682400  |
| H | 2.11907100  | 4.91221300  | 0.58725300  |
| C | 0.57464500  | 4.54641100  | 4.14336900  |
| H | -0.92528300 | 3.30590700  | 3.19690800  |
| C | 1.73725300  | 5.30981600  | 3.95989400  |
| H | 3.19151900  | 6.03548700  | 2.52822600  |
| H | 0.14179500  | 4.44032200  | 5.13698700  |
| H | 2.20822900  | 5.80015900  | 4.81065400  |
| C | -0.42681900 | 2.47549700  | -2.78099500 |
| H | 0.64796900  | 2.48299600  | -2.56155500 |
| H | -0.73581200 | 3.45586900  | -3.15486600 |
| C | -0.75879300 | 1.31278800  | -3.73112100 |
| H | -1.69293400 | 1.49450300  | -4.28484900 |
| H | 0.02996500  | 1.08974100  | -4.45716200 |
| C | -1.00286000 | 0.16101000  | -2.79989500 |
| C | -1.03590100 | 0.54023400  | -1.44734600 |
| H | -1.60593300 | -0.01933100 | -0.70737800 |
| N | -3.04356900 | -2.91157500 | 0.53000700  |
| S | -1.59732300 | -2.60209700 | 1.22803600  |

|   |             |             |             |
|---|-------------|-------------|-------------|
| S | -4.44123700 | -2.30159800 | 1.12502500  |
| O | -1.36036500 | -1.19709800 | 1.61157200  |
| O | -0.58977100 | -3.29694800 | 0.40717800  |
| O | -5.53426500 | -3.08513400 | 0.52796900  |
| O | -4.45043500 | -2.01701800 | 2.57304300  |
| C | -1.58613200 | -3.58818700 | 2.91614500  |
| C | -4.62108100 | -0.57088700 | 0.29054100  |
| F | -1.75070300 | -2.75766400 | 3.95505200  |
| F | -2.55723700 | -4.51702700 | 2.93246700  |
| F | -0.39779700 | -4.21069500 | 3.04508700  |
| F | -4.35130000 | -0.66273100 | -1.02763200 |
| F | -5.88777100 | -0.14164300 | 0.44264100  |
| F | -3.79162300 | 0.32078800  | 0.84905700  |

**TS3<sub>DCE</sub>**

0 1

|   |            |             |             |
|---|------------|-------------|-------------|
| C | 4.07020200 | -3.40015800 | -0.42423300 |
| C | 4.71486000 | -2.30815400 | 0.21691200  |
| C | 5.92170800 | -2.53272900 | 0.90980600  |
| C | 6.48268300 | -3.81155200 | 0.99267600  |
| C | 5.83136900 | -4.89488500 | 0.38928400  |
| C | 4.63838300 | -4.68483300 | -0.30918100 |
| C | 2.81688400 | -3.25103600 | -1.21515800 |
| C | 1.65717100 | -3.95580300 | -0.84044500 |
| C | 0.46864700 | -3.80590000 | -1.56348200 |
| C | 0.42106900 | -2.94926700 | -2.67128800 |
| C | 1.57135900 | -2.24911900 | -3.05741500 |
| C | 2.76272800 | -2.40592000 | -2.33976900 |
| H | 6.42372900 | -1.70576000 | 1.40576600  |
| H | 7.41656900 | -3.95916000 | 1.53320200  |
| H | 6.25241200 | -5.89720100 | 0.45535300  |

|   |             |             |             |
|---|-------------|-------------|-------------|
| H | 4.13689600  | -5.52073400 | -0.79486400 |
| H | 1.68589700  | -4.60192500 | 0.03581200  |
| H | -0.42733800 | -4.33375500 | -1.24575100 |
| H | -0.50743200 | -2.82206000 | -3.22351000 |
| H | 1.54422100  | -1.58174200 | -3.91782700 |
| H | 3.65487000  | -1.87041100 | -2.65223900 |
| P | 3.97219900  | -0.62096900 | 0.22219400  |
| C | 4.85495900  | 0.28283900  | -1.15796900 |
| C | 3.96951200  | 1.39050300  | -1.76572600 |
| C | 6.24688600  | 0.81091200  | -0.75102000 |
| H | 5.00844300  | -0.48960500 | -1.92471100 |
| C | 4.68022400  | 2.05287800  | -2.95941600 |
| H | 3.75462300  | 2.14791000  | -1.00164100 |
| H | 3.00524900  | 0.96370000  | -2.07405600 |
| C | 6.94005700  | 1.47543200  | -1.95686600 |
| H | 6.13902500  | 1.55325700  | 0.05218100  |
| H | 6.86325100  | -0.01174300 | -0.36248400 |
| C | 6.06465700  | 2.59288200  | -2.55576900 |
| H | 4.05340400  | 2.86412300  | -3.35509800 |
| H | 4.80252300  | 1.30645600  | -3.76216000 |
| H | 7.91657600  | 1.87571300  | -1.64607700 |
| H | 7.12898200  | 0.71116300  | -2.72862200 |
| H | 6.56627900  | 3.04417300  | -3.42486400 |
| H | 5.93149300  | 3.38858100  | -1.80466000 |
| C | 4.49812700  | 0.16097900  | 1.82897800  |
| C | 3.98045400  | 1.61689700  | 1.89148400  |
| C | 3.94080200  | -0.66017700 | 3.01342600  |
| H | 5.59541200  | 0.17771600  | 1.87423800  |
| C | 4.34867700  | 2.27187500  | 3.23484200  |
| H | 2.88548900  | 1.61000000  | 1.78294800  |

|    |             |             |             |
|----|-------------|-------------|-------------|
| H  | 4.37838200  | 2.20982400  | 1.06074200  |
| C  | 4.29823500  | -0.00026500 | 4.35896900  |
| H  | 2.84449900  | -0.71316000 | 2.91137600  |
| H  | 4.32317300  | -1.68910400 | 2.98132000  |
| C  | 3.79871500  | 1.45500800  | 4.41792900  |
| H  | 3.95324800  | 3.29794000  | 3.25896600  |
| H  | 5.44608000  | 2.34046600  | 3.31751600  |
| H  | 3.86683900  | -0.58808800 | 5.18259600  |
| H  | 5.39347300  | -0.01269700 | 4.48650400  |
| H  | 4.08756700  | 1.91965600  | 5.37218900  |
| H  | 2.69709000  | 1.45738300  | 4.37075200  |
| Au | 1.65307900  | -0.46160100 | 0.19490000  |
| C  | -6.15045300 | 4.46697900  | 1.21172200  |
| C  | -4.95661700 | 3.95831000  | 0.69317800  |
| C  | -4.34843900 | 2.82408800  | 1.28203000  |
| C  | -4.96347400 | 2.22150300  | 2.40463300  |
| C  | -6.15978500 | 2.73598900  | 2.91320400  |
| C  | -6.75835400 | 3.85745000  | 2.32006700  |
| H  | -6.61076200 | 5.33811000  | 0.74707100  |
| H  | -4.49031300 | 4.42194600  | -0.17378400 |
| H  | -4.50127800 | 1.34811000  | 2.85800400  |
| H  | -6.62792900 | 2.25671400  | 3.77204200  |
| H  | -7.69205600 | 4.25312500  | 2.71743300  |
| C  | -3.15250800 | 2.27727900  | 0.72966100  |
| C  | -2.15773400 | 1.78256300  | 0.23103300  |
| C  | -0.93846100 | 1.20516800  | -0.36379800 |
| O  | -1.34049000 | -2.36099600 | 0.46263100  |
| C  | -0.80499300 | -2.56205500 | 1.79001800  |
| H  | 0.27815700  | -2.37726800 | 1.79701200  |
| H  | -1.30686100 | -1.90135100 | 2.50688400  |



|   |             |             |             |
|---|-------------|-------------|-------------|
| H | -1.01126700 | -3.60875200 | 2.03253000  |
| C | 0.06515500  | 2.27024600  | -0.48788200 |
| C | 0.91147600  | 3.14287000  | -0.56593600 |
| C | 1.95728700  | 4.10820300  | -0.64666400 |
| C | 2.31248300  | 4.68612900  | -1.88843900 |
| C | 2.68908700  | 4.46711400  | 0.51099600  |
| C | 3.37514000  | 5.59080800  | -1.96701600 |
| H | 1.75620300  | 4.40976000  | -2.78206700 |
| C | 3.75039700  | 5.37203600  | 0.42156500  |
| H | 2.42682800  | 4.01909500  | 1.46656400  |
| C | 4.09977900  | 5.93519900  | -0.81565000 |
| H | 3.64274600  | 6.02322700  | -2.93015000 |
| H | 4.30920500  | 5.63494200  | 1.31885300  |
| H | 4.92937800  | 6.63766700  | -0.88206100 |
| C | -1.27542800 | 0.51579100  | -1.74203800 |
| H | -0.32875100 | 0.42048200  | -2.30400600 |
| H | -1.97912000 | 1.11657500  | -2.33082300 |
| C | -1.78927800 | -0.84078100 | -1.30748800 |
| H | -3.38780700 | -0.65834400 | -0.69380700 |
| H | -2.09615600 | -1.60761400 | -2.01425900 |
| C | -1.21344000 | -1.14300200 | -0.08760700 |
| C | -0.44357100 | -0.02926200 | 0.49131100  |
| H | -0.59455500 | 0.12871600  | 1.56605600  |
| N | -4.49377300 | -0.69401200 | -0.41882000 |
| S | -4.84002200 | -1.37712600 | 1.08981200  |
| S | -5.54841300 | -0.68420300 | -1.73630200 |
| O | -6.67788600 | -1.59189000 | -1.53135400 |
| O | -4.72338600 | -0.72480700 | -2.94384600 |
| C | -6.22979800 | 1.11122900  | -1.62542400 |
| O | -3.72098700 | -1.01073300 | 1.95472900  |

|   |             |             |             |
|---|-------------|-------------|-------------|
| O | -6.22926200 | -1.13780100 | 1.47205400  |
| C | -4.66382400 | -3.29910300 | 0.74866900  |
| F | -4.06321100 | -3.50923200 | -0.42828400 |
| F | -3.93283600 | -3.83550000 | 1.73137800  |
| F | -5.87802200 | -3.85416500 | 0.73523600  |
| F | -6.76057900 | 1.32466600  | -0.42150900 |
| F | -5.22889800 | 1.96846500  | -1.85012000 |
| F | -7.17016900 | 1.25834100  | -2.56923900 |

**IM2<sub>DCE</sub>**

0 1

|   |             |             |             |
|---|-------------|-------------|-------------|
| C | 3.21153600  | -2.72557000 | -1.19624200 |
| C | 3.46802500  | -2.03826900 | 0.02054000  |
| C | 4.19780700  | -2.68666600 | 1.03624600  |
| C | 4.65137200  | -4.00074400 | 0.87588200  |
| C | 4.37208700  | -4.69064600 | -0.31066000 |
| C | 3.66101400  | -4.05326300 | -1.33256700 |
| C | 2.44049900  | -2.11701800 | -2.31596800 |
| C | 1.23367100  | -2.70941100 | -2.73340700 |
| C | 0.46016400  | -2.11612200 | -3.73637700 |
| C | 0.87950400  | -0.92326100 | -4.34005100 |
| C | 2.08989300  | -0.33739200 | -3.94773700 |
| C | 2.86811700  | -0.93550900 | -2.94943500 |
| H | 4.39817100  | -2.17202900 | 1.97315200  |
| H | 5.20961700  | -4.48300700 | 1.67717500  |
| H | 4.70861200  | -5.71821000 | -0.44240600 |
| H | 3.44965000  | -4.58182200 | -2.26125000 |
| H | 0.88665600  | -3.61603800 | -2.24439000 |
| H | -0.47808900 | -2.57938100 | -4.03376200 |
| H | 0.26614600  | -0.45206500 | -5.10528900 |

|   |            |             |             |
|---|------------|-------------|-------------|
| H | 2.42951200 | 0.58647500  | -4.41396600 |
| H | 3.80825000 | -0.47832000 | -2.65526500 |
| P | 2.77623400 | -0.35587100 | 0.32630400  |
| C | 4.17703000 | 0.79137600  | -0.15409100 |
| C | 3.65012700 | 2.15203500  | -0.65097500 |
| C | 5.24616500 | 0.94841900  | 0.94729300  |
| H | 4.66047500 | 0.28279000  | -0.99939500 |
| C | 4.81417600 | 3.03699500  | -1.13244000 |
| H | 3.12168900 | 2.65929500  | 0.16486100  |
| H | 2.91748700 | 1.99363200  | -1.45384500 |
| C | 6.39916400 | 1.84398600  | 0.45053900  |
| H | 4.79498100 | 1.40920900  | 1.83694900  |
| H | 5.62913600 | -0.03889500 | 1.24292500  |
| C | 5.87390100 | 3.21055400  | -0.02899500 |
| H | 4.42550800 | 4.01519500  | -1.44746100 |
| H | 5.28400300 | 2.56580600  | -2.01236000 |
| H | 7.13827100 | 1.97534400  | 1.25493500  |
| H | 6.91029600 | 1.33981400  | -0.38627400 |
| H | 6.70626400 | 3.83123700  | -0.39312200 |
| H | 5.41788300 | 3.74105100  | 0.82251900  |
| C | 2.56120000 | -0.20074900 | 2.17300300  |
| C | 2.05918100 | 1.22094800  | 2.51827500  |
| C | 1.55532800 | -1.25921600 | 2.67294000  |
| H | 3.53378800 | -0.35412300 | 2.66055400  |
| C | 1.81967500 | 1.36162600  | 4.03266600  |
| H | 1.11412100 | 1.40554900  | 1.98619500  |
| H | 2.77052700 | 1.98065700  | 2.17723600  |
| C | 1.29195700 | -1.11232200 | 4.18293200  |
| H | 0.61242700 | -1.12628200 | 2.12122800  |
| H | 1.92451000 | -2.26671200 | 2.45197200  |

|    |             |             |             |
|----|-------------|-------------|-------------|
| C  | 0.81489800  | 0.30854300  | 4.53365000  |
| H  | 1.45296900  | 2.37547300  | 4.25105300  |
| H  | 2.77712000  | 1.23667000  | 4.56579500  |
| H  | 0.54532700  | -1.85705000 | 4.49643100  |
| H  | 2.22267800  | -1.32824400 | 4.73401500  |
| H  | 0.66608000  | 0.40519500  | 5.61945300  |
| H  | -0.15882200 | 0.48873200  | 4.05031700  |
| Au | 0.69098600  | 0.15478900  | -0.59264700 |
| C  | -7.24559500 | 2.93149800  | 0.60353400  |
| C  | -5.97041100 | 2.58752300  | 0.14606500  |
| C  | -5.09653300 | 3.58492200  | -0.35302000 |
| C  | -5.53689700 | 4.92996800  | -0.37892900 |
| C  | -6.81432100 | 5.26303900  | 0.08241700  |
| C  | -7.67325500 | 4.26793500  | 0.57353200  |
| H  | -7.90643500 | 2.15437500  | 0.98606600  |
| H  | -5.63723200 | 1.55253100  | 0.17078400  |
| H  | -4.86951900 | 5.70114700  | -0.75971100 |
| H  | -7.14036100 | 6.30210400  | 0.05830200  |
| H  | -8.66752400 | 4.53224900  | 0.93104700  |
| C  | -3.79449100 | 3.22623900  | -0.81508800 |
| C  | -2.69176300 | 2.87949800  | -1.20191300 |
| C  | -1.35601800 | 2.36811800  | -1.57159600 |
| O  | -2.33946600 | -1.10210500 | -2.02414700 |
| C  | -3.13763400 | -1.71127900 | -3.05988300 |
| H  | -4.01865800 | -1.08630100 | -3.26271500 |
| H  | -2.54428400 | -1.82613200 | -3.97611500 |
| H  | -3.43602500 | -2.69159700 | -2.67944400 |
| C  | -0.34126300 | 3.24519700  | -0.97773200 |
| C  | 0.47579700  | 3.96278100  | -0.42882500 |
| C  | 1.45584400  | 4.73766400  | 0.25754000  |

|   |             |             |             |
|---|-------------|-------------|-------------|
| C | 2.29760300  | 5.63611300  | -0.43927300 |
| C | 1.62344600  | 4.58503600  | 1.65545500  |
| C | 3.28378300  | 6.35295600  | 0.24530300  |
| H | 2.17573200  | 5.75509000  | -1.51423200 |
| C | 2.61257200  | 5.30553100  | 2.33009500  |
| H | 0.98368100  | 3.88935300  | 2.19315800  |
| C | 3.44822900  | 6.18901600  | 1.62903100  |
| H | 3.93020800  | 7.03649600  | -0.30359300 |
| H | 2.73458200  | 5.17424400  | 3.40458300  |
| H | 4.22101500  | 6.74599300  | 2.15694700  |
| C | -1.23490000 | 2.22112400  | -3.13836500 |
| H | -0.16099900 | 2.18813700  | -3.39635000 |
| H | -1.68743900 | 3.07703400  | -3.65594200 |
| C | -1.91024600 | 0.89004200  | -3.39495300 |
| H | -2.14724900 | -1.77209800 | -0.49882800 |
| H | -2.25527000 | 0.55480500  | -4.36763400 |
| C | -1.88818200 | 0.17297300  | -2.25187300 |
| C | -1.26729800 | 0.85719100  | -1.08767300 |
| H | -1.87223900 | 0.73420800  | -0.18273200 |
| N | -2.16076400 | -2.33849100 | 0.39537600  |
| S | -1.87775100 | -4.00171900 | 0.12361300  |
| S | -2.99914400 | -1.65069200 | 1.71011100  |
| O | -2.56726100 | -0.26215400 | 1.81893100  |
| O | -2.97055800 | -2.57673200 | 2.83499800  |
| C | -4.79608100 | -1.58819400 | 1.00808400  |
| O | -2.79976900 | -4.84168600 | 0.87892300  |
| O | -1.67578700 | -4.13881000 | -1.31662000 |
| C | -0.14253000 | -4.16916900 | 0.93408500  |
| F | -0.24205300 | -3.97965000 | 2.25123700  |
| F | 0.30947800  | -5.40268400 | 0.68027800  |

|   |             |             |             |
|---|-------------|-------------|-------------|
| F | 0.67271200  | -3.26688100 | 0.39610100  |
| F | -4.77078800 | -0.96139400 | -0.17507900 |
| F | -5.26166800 | -2.82875700 | 0.85389200  |
| F | -5.56082900 | -0.90910300 | 1.86610900  |

### IM3<sub>DCE</sub>

0 1

|   |             |             |             |
|---|-------------|-------------|-------------|
| C | -3.07737100 | -1.85924700 | -2.28778200 |
| C | -2.77718300 | -2.63094900 | -1.13159300 |
| C | -3.78632000 | -3.43147600 | -0.56149300 |
| C | -5.07949700 | -3.46095900 | -1.09535500 |
| C | -5.38557500 | -2.67416700 | -2.21262200 |
| C | -4.39008900 | -1.88453600 | -2.79738500 |
| C | -2.07524800 | -0.98476800 | -2.95973700 |
| C | -2.28635700 | 0.40612600  | -3.01581500 |
| C | -1.31563200 | 1.25260700  | -3.56262600 |
| C | -0.12203500 | 0.72143400  | -4.06900500 |
| C | 0.08309200  | -0.66425700 | -4.04992900 |
| C | -0.88971900 | -1.51150900 | -3.50564600 |
| H | -3.56769700 | -4.02373300 | 0.32369900  |
| H | -5.84239400 | -4.08609600 | -0.63333400 |
| H | -6.39158000 | -2.67741200 | -2.63018000 |
| H | -4.61941300 | -1.27861800 | -3.67293500 |
| H | -3.19514400 | 0.82308800  | -2.58887400 |
| H | -1.48011600 | 2.32826600  | -3.56485900 |
| H | 0.64416600  | 1.38316400  | -4.47033600 |
| H | 1.00384400  | -1.08806900 | -4.44862700 |
| H | -0.72330600 | -2.58503900 | -3.49192500 |
| P | -1.13225400 | -2.53273400 | -0.29641500 |
| C | -0.18632000 | -3.97795100 | -1.01981400 |

|   |             |             |             |
|---|-------------|-------------|-------------|
| C | 1.33052600  | -3.70720900 | -1.06583200 |
| C | -0.50555100 | -5.32818500 | -0.34469500 |
| H | -0.55192400 | -4.03792300 | -2.05414300 |
| C | 2.05256300  | -4.85676300 | -1.79206200 |
| H | 1.71923900  | -3.62079500 | -0.04335000 |
| H | 1.52195900  | -2.74709800 | -1.56387500 |
| C | 0.23151600  | -6.47303800 | -1.06962600 |
| H | -0.17858800 | -5.29910700 | 0.70426100  |
| H | -1.59022600 | -5.50774400 | -0.35098200 |
| C | 1.74865700  | -6.21122200 | -1.12521900 |
| H | 3.13503100  | -4.66832800 | -1.79986600 |
| H | 1.71361100  | -4.88539900 | -2.84143000 |
| H | 0.02433300  | -7.42673400 | -0.56136200 |
| H | -0.16008000 | -6.55612000 | -2.09688700 |
| H | 2.25571200  | -7.02569800 | -1.66397700 |
| H | 2.14890400  | -6.19648900 | -0.09901000 |
| C | -1.43079100 | -2.90911600 | 1.50129700  |
| C | -0.07381400 | -2.88675600 | 2.24218200  |
| C | -2.38924500 | -1.86117500 | 2.10684600  |
| H | -1.86952000 | -3.91250500 | 1.59725500  |
| C | -0.26508600 | -3.11136300 | 3.75282000  |
| H | 0.40290100  | -1.90805700 | 2.07734700  |
| H | 0.60418900  | -3.64321200 | 1.83300600  |
| C | -2.57597200 | -2.08559000 | 3.61815300  |
| H | -1.96204800 | -0.86205000 | 1.93880900  |
| H | -3.36020600 | -1.89073900 | 1.59912100  |
| C | -1.22410800 | -2.06805000 | 4.35370800  |
| H | 0.71323600  | -3.06790200 | 4.25338400  |
| H | -0.67518700 | -4.12120700 | 3.92083800  |
| H | -3.24462300 | -1.31168300 | 4.02231200  |

|    |             |             |             |
|----|-------------|-------------|-------------|
| H  | -3.06514900 | -3.06064500 | 3.78222000  |
| H  | -1.36837800 | -2.25332000 | 5.42855700  |
| H  | -0.77416600 | -1.06682400 | 4.24854900  |
| Au | -0.06127200 | -0.46598300 | -0.42569500 |
| C  | 9.39354200  | 2.91311900  | -0.10353200 |
| C  | 8.14580700  | 2.31067700  | 0.08382900  |
| C  | 6.97930900  | 2.89905300  | -0.46284900 |
| C  | 7.09968000  | 4.10256900  | -1.19906000 |
| C  | 8.35239900  | 4.69656600  | -1.37992600 |
| C  | 9.50254100  | 4.10652600  | -0.83364500 |
| H  | 10.28295400 | 2.45070300  | 0.32270000  |
| H  | 8.05916600  | 1.38535900  | 0.65061800  |
| H  | 6.20643000  | 4.55986400  | -1.62091400 |
| H  | 8.43117000  | 5.62315200  | -1.94716000 |
| H  | 10.47610400 | 4.57359500  | -0.97588000 |
| C  | 5.70202100  | 2.29149800  | -0.26784500 |
| C  | 4.61054900  | 1.77800800  | -0.09381600 |
| C  | 3.28357800  | 1.18005500  | 0.12054600  |
| O  | 0.11370800  | 2.43860300  | 1.51451800  |
| C  | 0.34860600  | 2.86928900  | 2.87443100  |
| H  | 0.69364000  | 2.01701500  | 3.47501100  |
| H  | 1.09703300  | 3.67277100  | 2.88820000  |
| H  | -0.61237900 | 3.23238600  | 3.24911700  |
| C  | 3.44947800  | -0.24581800 | 0.47888000  |
| C  | 3.63229200  | -1.39459000 | 0.84272400  |
| C  | 3.82791100  | -2.74261600 | 1.26470800  |
| C  | 3.24714700  | -3.20875500 | 2.46755900  |
| C  | 4.58531800  | -3.64164000 | 0.47646100  |
| C  | 3.41150100  | -4.53975700 | 2.86127100  |
| H  | 2.65571800  | -2.52576300 | 3.07204100  |



|   |             |             |             |
|---|-------------|-------------|-------------|
| C | 4.74645100  | -4.96978700 | 0.87990000  |
| H | 5.02957900  | -3.28895800 | -0.45206400 |
| C | 4.15854900  | -5.42555400 | 2.06987100  |
| H | 2.95127000  | -4.88745100 | 3.78525400  |
| H | 5.32379000  | -5.65372900 | 0.25942400  |
| H | 4.28117100  | -6.46333300 | 2.37664800  |
| C | 2.34759100  | 1.36479100  | -1.14258600 |
| H | 2.51038300  | 0.56757800  | -1.87450300 |
| H | 2.60852500  | 2.33202900  | -1.59832800 |
| C | 0.91545900  | 1.42598200  | -0.55296000 |
| H | 0.27217000  | 2.09724100  | -1.13833500 |
| C | 1.18553300  | 1.96864700  | 0.80119400  |
| C | 2.47090200  | 1.89013400  | 1.21304100  |
| H | 2.87863900  | 2.09674200  | 2.19591400  |
| N | -2.35321200 | 2.90573400  | 0.56750400  |
| S | -2.42819700 | 4.22217700  | -0.49992600 |
| S | -3.58671400 | 2.30128100  | 1.57605100  |
| O | -3.80397500 | 4.41161700  | -0.94303800 |
| O | -1.30297000 | 4.06852800  | -1.41684500 |
| O | -2.89389200 | 1.58249000  | 2.64246800  |
| O | -4.61676300 | 3.30269300  | 1.82645700  |
| C | -1.96065200 | 5.69727900  | 0.65212800  |
| C | -4.36263600 | 0.97137500  | 0.41872600  |
| F | -2.83794100 | 5.79077600  | 1.65233600  |
| F | -0.73358500 | 5.48461200  | 1.14121900  |
| F | -1.97439400 | 6.81519200  | -0.07830200 |
| F | -3.39675500 | 0.20725400  | -0.07759400 |
| F | -5.20485900 | 0.23280100  | 1.15105200  |
| F | -5.02718400 | 1.57241200  | -0.57189700 |
| H | -1.37368700 | 2.62055700  | 0.85768400  |

**TS4<sub>DCE</sub>**

0 1

|   |            |             |             |
|---|------------|-------------|-------------|
| C | 4.58103400 | -2.81739200 | -1.57866100 |
| C | 5.03274400 | -1.94078100 | -0.55507400 |
| C | 6.23931400 | -2.23402200 | 0.11296800  |
| C | 6.98175100 | -3.37898200 | -0.19456200 |
| C | 6.51664100 | -4.26328100 | -1.17578900 |
| C | 5.32918000 | -3.97897200 | -1.85692000 |
| C | 3.34687100 | -2.56937900 | -2.37455500 |
| C | 2.27394700 | -3.47841700 | -2.31164000 |
| C | 1.08332100 | -3.22001400 | -3.00059800 |
| C | 0.94988000 | -2.05187900 | -3.76336800 |
| C | 2.02167700 | -1.15385300 | -3.85249800 |
| C | 3.21573800 | -1.41452900 | -3.16896500 |
| H | 6.59949300 | -1.56887300 | 0.89396100  |
| H | 7.91027500 | -3.58129400 | 0.33759300  |
| H | 7.07799900 | -5.16542300 | -1.41541600 |
| H | 4.97204100 | -4.65405700 | -2.63348300 |
| H | 2.36626000 | -4.36814900 | -1.69081000 |
| H | 0.25179100 | -3.91919500 | -2.92322300 |
| H | 0.01464900 | -1.84054900 | -4.27984300 |
| H | 1.92735700 | -0.24583900 | -4.44660500 |
| H | 4.04492800 | -0.71393400 | -3.23592400 |
| P | 4.05672200 | -0.46570300 | -0.01357800 |
| C | 4.86731900 | 0.96597500  | -0.90178500 |
| C | 3.87831200 | 2.12648300  | -1.13405000 |
| C | 6.17192400 | 1.44904900  | -0.23505200 |
| H | 5.13010900 | 0.54526900  | -1.88329200 |
| C | 4.54220900 | 3.23160900  | -1.97522700 |

|    |            |             |             |
|----|------------|-------------|-------------|
| H  | 3.56541800 | 2.54319100  | -0.16898800 |
| H  | 2.97242500 | 1.74922300  | -1.62850400 |
| C  | 6.82221800 | 2.56469600  | -1.07792200 |
| H  | 5.94326300 | 1.84289700  | 0.76557500  |
| H  | 6.86816400 | 0.60794000  | -0.11180300 |
| C  | 5.84074200 | 3.72866500  | -1.31330300 |
| H  | 3.83849700 | 4.06431900  | -2.11022100 |
| H  | 4.77678000 | 2.82917800  | -2.97506400 |
| H  | 7.73245000 | 2.92468300  | -0.57559300 |
| H  | 7.12785400 | 2.14644900  | -2.05103700 |
| H  | 6.31325900 | 4.50478400  | -1.93379500 |
| H  | 5.59005300 | 4.18977800  | -0.34427100 |
| C  | 4.39126400 | -0.29085300 | 1.80809500  |
| C  | 3.66319800 | 0.96591400  | 2.33346000  |
| C  | 3.89303500 | -1.55354600 | 2.54743300  |
| H  | 5.47066800 | -0.17013700 | 1.97205500  |
| C  | 3.84112500 | 1.11163300  | 3.85482700  |
| H  | 2.59144100 | 0.87363800  | 2.10046300  |
| H  | 4.02364100 | 1.86635500  | 1.82417200  |
| C  | 4.06235700 | -1.40463500 | 4.07137200  |
| H  | 2.82625800 | -1.69630700 | 2.30992900  |
| H  | 4.42931600 | -2.44242700 | 2.18989900  |
| C  | 3.34705800 | -0.14494200 | 4.59366300  |
| H  | 3.29512500 | 2.00112400  | 4.20055100  |
| H  | 4.90822400 | 1.27190200  | 4.08214700  |
| H  | 3.67327400 | -2.30306500 | 4.57295800  |
| H  | 5.13674500 | -1.33578100 | 4.31039300  |
| H  | 3.50275800 | -0.03901900 | 5.67757300  |
| H  | 2.26277400 | -0.25348600 | 4.42572300  |
| Au | 1.75685300 | -0.63453900 | -0.28775400 |

|   |             |             |             |
|---|-------------|-------------|-------------|
| C | -7.29309700 | 3.64953700  | -0.48505400 |
| C | -6.01974000 | 3.18888400  | -0.13791200 |
| C | -5.03279600 | 3.00222000  | -1.13484600 |
| C | -5.35393600 | 3.29248600  | -2.48222400 |
| C | -6.63026500 | 3.75295800  | -2.81839000 |
| C | -7.60428500 | 3.93118700  | -1.82389800 |
| H | -8.04591100 | 3.78266800  | 0.29078600  |
| H | -5.77851200 | 2.96196900  | 0.89835800  |
| H | -4.60018600 | 3.14405400  | -3.25309500 |
| H | -6.86728800 | 3.96907000  | -3.85940100 |
| H | -8.59898300 | 4.28534800  | -2.09112600 |
| C | -3.75310500 | 2.47393400  | -0.79214900 |
| C | -2.69026200 | 1.95369000  | -0.50644900 |
| C | -1.47262400 | 1.20664200  | -0.15738900 |
| O | -0.77144500 | -1.93014700 | 1.62924800  |
| C | -1.10392200 | -1.70480500 | 3.02055300  |
| H | -0.41250900 | -0.96482200 | 3.44789200  |
| H | -2.13588900 | -1.35335700 | 3.13006800  |
| H | -0.98221000 | -2.67158900 | 3.51802100  |
| C | -0.37983400 | 2.15229500  | 0.15076500  |
| C | 0.47392400  | 2.96643000  | 0.45645200  |
| C | 1.48894100  | 3.90369900  | 0.80872500  |
| C | 1.93020000  | 4.87228200  | -0.12408500 |
| C | 2.09087900  | 3.86142800  | 2.08828200  |
| C | 2.95302100  | 5.76205500  | 0.21376200  |
| H | 1.47448500  | 4.90542800  | -1.11157300 |
| C | 3.11363500  | 4.75528900  | 2.41681900  |
| H | 1.76401000  | 3.11346200  | 2.80634900  |
| C | 3.55190400  | 5.70525200  | 1.48162600  |
| H | 3.29150400  | 6.49489800  | -0.51715400 |

|   |             |             |             |
|---|-------------|-------------|-------------|
| H | 3.57468000  | 4.70507300  | 3.40231800  |
| H | 4.35351200  | 6.39626900  | 1.73852700  |
| C | -1.06515100 | 0.19186700  | -1.29848500 |
| H | -0.45997400 | 0.68166900  | -2.06719200 |
| H | -1.99137700 | -0.18211200 | -1.75285800 |
| C | -0.34942500 | -0.94760200 | -0.54164600 |
| H | -0.45992500 | -1.92526700 | -1.02828300 |
| C | -0.95661400 | -0.89669900 | 0.79247200  |
| C | -1.69804300 | 0.24827800  | 1.02850200  |
| H | -1.96944000 | 0.63728800  | 2.00499100  |
| N | -4.29449800 | -0.80669000 | 0.50448900  |
| S | -4.61351800 | -1.90760400 | -0.73534000 |
| S | -5.30581400 | -0.56780700 | 1.84418100  |
| O | -5.65102600 | -2.85468200 | -0.32451400 |
| O | -3.32280000 | -2.33881500 | -1.27007700 |
| O | -4.64845500 | 0.47370000  | 2.63272700  |
| O | -6.70693000 | -0.48307600 | 1.44351200  |
| C | -5.41250300 | -0.78182200 | -2.08644900 |
| C | -5.10439700 | -2.23963700 | 2.85650500  |
| F | -6.35168600 | -0.01049100 | -1.54088100 |
| F | -4.46943700 | -0.02774600 | -2.65677500 |
| F | -5.96219300 | -1.58638600 | -3.00637900 |
| F | -4.85500600 | -1.92243300 | 4.13141500  |
| F | -6.23165400 | -2.94346800 | 2.77633600  |
| F | -4.08396200 | -2.95745400 | 2.36822900  |
| H | -3.23216500 | -0.47010000 | 0.65290500  |

**E<sub>DCE</sub>**

0 1

|   |             |             |             |
|---|-------------|-------------|-------------|
| C | -5.92327800 | -0.69312000 | -1.00574400 |
|---|-------------|-------------|-------------|

|   |             |             |             |
|---|-------------|-------------|-------------|
| C | -4.68146900 | -0.06577800 | -0.86783700 |
| C | -3.71492200 | -0.58641600 | 0.02606800  |
| C | -4.02592300 | -1.74743500 | 0.77438700  |
| C | -5.27080900 | -2.36660900 | 0.62808500  |
| C | -6.22269100 | -1.84383000 | -0.26058600 |
| H | -6.65871800 | -0.28331200 | -1.69679100 |
| H | -4.44717800 | 0.82684700  | -1.44527000 |
| H | -3.28570200 | -2.15178900 | 1.46248900  |
| H | -5.49841400 | -3.25968300 | 1.20863700  |
| H | -7.19081500 | -2.33012800 | -0.37182300 |
| C | -2.44336800 | 0.04675600  | 0.17087600  |
| C | -1.35602600 | 0.58080100  | 0.29725300  |
| C | -0.04313500 | 1.21690800  | 0.46028100  |
| O | 1.74591000  | 4.38525000  | -0.31814100 |
| C | 2.05989600  | 4.29343800  | -1.72574000 |
| H | 2.69362700  | 3.41778000  | -1.93093900 |
| H | 1.14560100  | 4.24346400  | -2.33483400 |
| H | 2.60931200  | 5.20995400  | -1.96589000 |
| C | 1.01392900  | 0.20301000  | 0.29262400  |
| C | 1.88815500  | -0.63289900 | 0.15194700  |
| C | 2.91596400  | -1.61034600 | -0.01271800 |
| C | 3.93070300  | -1.75771400 | 0.96357700  |
| C | 2.93280400  | -2.44938100 | -1.15296900 |
| C | 4.93284300  | -2.71843700 | 0.79769300  |
| H | 3.92216800  | -1.11467400 | 1.84190500  |
| C | 3.93936400  | -3.40719600 | -1.30812500 |
| H | 2.15380500  | -2.34072700 | -1.90551900 |
| C | 4.94124500  | -3.54617200 | -0.33545300 |
| H | 5.70869700  | -2.82214300 | 1.55514300  |
| H | 3.94104700  | -4.04718700 | -2.18950200 |

|   |             |             |             |
|---|-------------|-------------|-------------|
| H | 5.72331200  | -4.29384300 | -0.45976400 |
| C | 0.12825700  | 1.92787400  | 1.87011000  |
| H | 0.50746900  | 1.21917900  | 2.61806500  |
| H | -0.85784300 | 2.28163700  | 2.21489100  |
| C | 1.06321600  | 3.06912500  | 1.55488700  |
| H | 1.58695200  | 3.65059000  | 2.31014400  |
| C | 1.08912000  | 3.32815400  | 0.23352300  |
| C | 0.19609900  | 2.39259700  | -0.56279900 |
| H | -0.75766000 | 2.88652400  | -0.80605100 |
| H | 0.63721300  | 2.02554300  | -1.49580000 |

**TS5<sub>DCE</sub>**

0 1

|   |             |             |             |
|---|-------------|-------------|-------------|
| C | -1.56005000 | -3.02996600 | -1.77126200 |
| C | -0.71037600 | -3.44232600 | -0.71133500 |
| C | -1.05107400 | -4.58524400 | 0.03969300  |
| C | -2.21872300 | -5.30643200 | -0.22952500 |
| C | -3.07140900 | -4.88610200 | -1.25689000 |
| C | -2.73907400 | -3.76027000 | -2.01548800 |
| C | -1.28477500 | -1.84364000 | -2.62961400 |
| C | -2.19169100 | -0.76647000 | -2.64763100 |
| C | -1.95104900 | 0.35312000  | -3.45064200 |
| C | -0.80485700 | 0.40930000  | -4.25418400 |
| C | 0.10233700  | -0.65782200 | -4.24682200 |
| C | -0.13803900 | -1.77884100 | -3.44265600 |
| H | -0.41261200 | -4.91000600 | 0.85684100  |
| H | -2.46388500 | -6.18173900 | 0.36998400  |
| H | -3.99201300 | -5.42871000 | -1.46636400 |
| H | -3.39777500 | -3.43051600 | -2.81711400 |
| H | -3.07653500 | -0.80274000 | -2.01849800 |

|   |             |             |             |
|---|-------------|-------------|-------------|
| H | -2.65411900 | 1.18349700  | -3.44099800 |
| H | -0.61738500 | 1.28281700  | -4.87569300 |
| H | 0.99656000  | -0.62206500 | -4.86789900 |
| H | 0.55996000  | -2.61222400 | -3.45477600 |
| P | 0.79873900  | -2.49271200 | -0.25233900 |
| C | 2.18674700  | -3.37074600 | -1.15362200 |
| C | 3.36636300  | -2.42166300 | -1.45034200 |
| C | 2.63714300  | -4.66241200 | -0.43755500 |
| H | 1.73535100  | -3.66587400 | -2.11101300 |
| C | 4.47925500  | -3.15005700 | -2.22516000 |
| H | 3.76893700  | -2.03350300 | -0.50737100 |
| H | 3.00561700  | -1.55575300 | -2.02245500 |
| C | 3.74222600  | -5.36841200 | -1.24794400 |
| H | 3.03179200  | -4.41476300 | 0.55743000  |
| H | 1.77769100  | -5.33256000 | -0.29765600 |
| C | 4.93427300  | -4.42519600 | -1.49224400 |
| H | 5.32838700  | -2.46649600 | -2.37360800 |
| H | 4.10122300  | -3.42514200 | -3.22382700 |
| H | 4.06876400  | -6.27242100 | -0.71302900 |
| H | 3.32954100  | -5.69047000 | -2.21809700 |
| H | 5.71559400  | -4.93926700 | -2.07131800 |
| H | 5.37352500  | -4.14414700 | -0.52158800 |
| C | 1.05045300  | -2.75942000 | 1.57328400  |
| C | 2.36461500  | -2.09477800 | 2.04351200  |
| C | -0.15426000 | -2.17960400 | 2.34526600  |
| H | 1.12286700  | -3.83890200 | 1.76185900  |
| C | 2.54148400  | -2.27519200 | 3.56291300  |
| H | 2.33008200  | -1.02178700 | 1.80356500  |
| H | 3.22815400  | -2.51248700 | 1.51447500  |
| C | 0.02900400  | -2.33327400 | 3.86580000  |



|    |             |             |             |
|----|-------------|-------------|-------------|
| H  | -0.24340100 | -1.11052400 | 2.09417100  |
| H  | -1.07964600 | -2.66815200 | 2.02671300  |
| C  | 1.34605400  | -1.69149800 | 4.33615100  |
| H  | 3.47804600  | -1.79591600 | 3.87663900  |
| H  | 2.63002500  | -3.35090700 | 3.78930600  |
| H  | -0.83088100 | -1.88193100 | 4.38240000  |
| H  | 0.03875800  | -3.40608700 | 4.12017000  |
| H  | 1.47976700  | -1.83889000 | 5.41813000  |
| H  | 1.30076800  | -0.60442000 | 4.15494000  |
| Au | 0.84993600  | -0.19940900 | -0.58297000 |
| C  | 3.17556800  | 8.43608900  | -0.17443900 |
| C  | 2.90050500  | 7.09344800  | -0.45048900 |
| C  | 3.76490100  | 6.07662900  | 0.02261900  |
| C  | 4.90636700  | 6.44079500  | 0.77678700  |
| C  | 5.17076400  | 7.78668800  | 1.04767500  |
| C  | 4.30896900  | 8.78794600  | 0.57437900  |
| H  | 2.50349000  | 9.20940300  | -0.54412600 |
| H  | 2.02110600  | 6.81812500  | -1.03019700 |
| H  | 5.57392900  | 5.66250000  | 1.14217000  |
| H  | 6.05193700  | 8.05480300  | 1.62909700  |
| H  | 4.51917900  | 9.83508100  | 0.78741000  |
| C  | 3.48626900  | 4.70493000  | -0.25717000 |
| C  | 3.25138500  | 3.53428100  | -0.50105500 |
| C  | 2.89663900  | 2.13421300  | -0.80049500 |
| O  | -0.47646500 | 2.83666000  | -1.87223400 |
| C  | -1.60513500 | 2.76021600  | -0.11168900 |
| H  | -1.32031600 | 1.71718100  | -0.01366500 |
| H  | -0.95125100 | 3.53668800  | 0.26360400  |
| H  | -2.45215100 | 3.02565600  | -0.73225500 |
| C  | 3.76797800  | 1.24061800  | -0.02948500 |

|   |             |             |             |
|---|-------------|-------------|-------------|
| C | 4.51161400  | 0.50949200  | 0.59901400  |
| C | 5.35418200  | -0.36638500 | 1.34460900  |
| C | 6.09251300  | -1.38353100 | 0.69358400  |
| C | 5.44828500  | -0.24362300 | 2.75085800  |
| C | 6.89107000  | -2.25893400 | 1.43529700  |
| H | 6.02511000  | -1.48289800 | -0.38698800 |
| C | 6.25384400  | -1.12101700 | 3.48265900  |
| H | 4.88023900  | 0.53502800  | 3.25611000  |
| C | 6.97364500  | -2.13343500 | 2.83059000  |
| H | 7.44978200  | -3.04057800 | 0.92259100  |
| H | 6.31416400  | -1.01838700 | 4.56522000  |
| H | 7.59607200  | -2.81792500 | 3.40511500  |
| C | 2.98171000  | 1.86005200  | -2.35038800 |
| H | 2.95658800  | 0.77148700  | -2.48641600 |
| H | 3.90359500  | 2.26436700  | -2.78095400 |
| C | 1.69832700  | 2.49796800  | -2.90285200 |
| H | 1.85106800  | 3.55882000  | -3.15168600 |
| H | 1.29908000  | 1.99592500  | -3.78975400 |
| C | 0.70861800  | 2.44828900  | -1.74339600 |
| C | 1.35891000  | 1.93375000  | -0.54688100 |
| H | 1.00465200  | 2.33333300  | 0.40758200  |
| O | -2.66429500 | 2.80404000  | 1.48065800  |
| H | -3.42139200 | 2.16429600  | 1.28035800  |
| H | -2.15253400 | 2.36267800  | 2.18076900  |
| N | -4.58496400 | 1.03551000  | 0.90988300  |
| S | -5.74591900 | 1.37604700  | -0.20482500 |
| S | -4.60200900 | -0.22404500 | 1.96372400  |
| O | -6.62586400 | 0.25784900  | -0.56671700 |
| O | -5.09539700 | 2.18198600  | -1.24910800 |
| O | -3.61494100 | 0.11619100  | 3.00312600  |

|   |             |             |             |
|---|-------------|-------------|-------------|
| O | -5.91806500 | -0.75994700 | 2.33143600  |
| C | -6.84295100 | 2.62429500  | 0.75305100  |
| C | -3.74502000 | -1.58553100 | 0.92675200  |
| F | -7.34241200 | 2.05398300  | 1.85946200  |
| F | -6.10936000 | 3.69512500  | 1.10053000  |
| F | -7.85506600 | 3.01996100  | -0.03703300 |
| F | -2.55161200 | -1.12985500 | 0.51174100  |
| F | -3.56527100 | -2.68236000 | 1.68289200  |
| F | -4.49527600 | -1.90420300 | -0.13735500 |

#### IM4<sub>DCE</sub>

0 1

|   |            |             |             |
|---|------------|-------------|-------------|
| C | 5.41545700 | -1.32175300 | 1.11647600  |
| C | 4.78874600 | -0.13312800 | 1.57924400  |
| C | 5.27698300 | 0.49166900  | 2.74451200  |
| C | 6.35153400 | -0.05025200 | 3.45889700  |
| C | 6.94830700 | -1.23921100 | 3.02110300  |
| C | 6.48002600 | -1.86449700 | 1.86045000  |
| C | 4.97749300 | -2.02147000 | -0.12517400 |
| C | 4.36194300 | -3.28384800 | -0.04171600 |
| C | 3.87667000 | -3.91469500 | -1.19331700 |
| C | 4.00606200 | -3.29363300 | -2.44237500 |
| C | 4.63620700 | -2.04586600 | -2.53792200 |
| C | 5.12451700 | -1.41671700 | -1.38690100 |
| H | 4.80718500 | 1.40111700  | 3.11001700  |
| H | 6.71205900 | 0.45046100  | 4.35635600  |
| H | 7.77741400 | -1.67605000 | 3.57614200  |
| H | 6.94839600 | -2.78221600 | 1.50750100  |
| H | 4.22729300 | -3.74737800 | 0.93414800  |
| H | 3.35786100 | -4.86610200 | -1.10613200 |

|   |            |             |             |
|---|------------|-------------|-------------|
| H | 3.61182500 | -3.77589300 | -3.33520700 |
| H | 4.74689000 | -1.55990500 | -3.50662000 |
| H | 5.62305400 | -0.45435200 | -1.46663300 |
| P | 3.31138500 | 0.55791600  | 0.71727400  |
| C | 4.01456500 | 1.82326500  | -0.46800300 |
| C | 3.12361300 | 2.00217600  | -1.71405700 |
| C | 4.35494500 | 3.16926900  | 0.20526100  |
| H | 4.96311600 | 1.37569200  | -0.79269100 |
| C | 3.79124800 | 2.96485900  | -2.71349100 |
| H | 2.14655500 | 2.40358700  | -1.41851600 |
| H | 2.93841200 | 1.02375800  | -2.17827400 |
| C | 5.01076000 | 4.12397900  | -0.81318000 |
| H | 3.43735100 | 3.63419400  | 0.59081700  |
| H | 5.02531500 | 3.00013600  | 1.05980400  |
| C | 4.11540400 | 4.31719900  | -2.05214900 |
| H | 3.13224900 | 3.11029900  | -3.58067300 |
| H | 4.72664800 | 2.50956200  | -3.08016000 |
| H | 5.21655100 | 5.09165300  | -0.33190200 |
| H | 5.97894900 | 3.70172600  | -1.12939800 |
| H | 4.60512000 | 4.98798200  | -2.77377300 |
| H | 3.17271600 | 4.79834500  | -1.74404700 |
| C | 2.34765000 | 1.49210100  | 2.00812400  |
| C | 1.13798600 | 2.19576300  | 1.35183400  |
| C | 1.85925600 | 0.53378800  | 3.11570900  |
| H | 2.99924400 | 2.26036000  | 2.44804800  |
| C | 0.34366300 | 2.98674700  | 2.40805900  |
| H | 0.49093000 | 1.43366700  | 0.89505000  |
| H | 1.45999600 | 2.86528000  | 0.54725300  |
| C | 1.05600000 | 1.30599100  | 4.18158900  |
| H | 1.22107000 | -0.23399300 | 2.65022700  |

|    |             |             |             |
|----|-------------|-------------|-------------|
| H  | 2.70797600  | 0.01683200  | 3.58247200  |
| C  | -0.12338900 | 2.07639700  | 3.55795300  |
| H  | -0.52138600 | 3.46906400  | 1.93050600  |
| H  | 0.98578500  | 3.78731000  | 2.81142000  |
| H  | 0.69020600  | 0.60532500  | 4.94680400  |
| H  | 1.73014100  | 2.01834400  | 4.68575300  |
| H  | -0.63804800 | 2.66996600  | 4.32814500  |
| H  | -0.85327500 | 1.35657600  | 3.16460700  |
| Au | 1.83228100  | -0.97319300 | -0.19410200 |
| C  | -6.91024600 | -1.87116400 | -1.68855900 |
| C  | -5.57176000 | -1.72153400 | -2.06630000 |
| C  | -4.56964800 | -2.54176200 | -1.48693700 |
| C  | -4.95105800 | -3.52126000 | -0.53670900 |
| C  | -6.29356100 | -3.66677000 | -0.17554600 |
| C  | -7.27598800 | -2.84164900 | -0.74400200 |
| H  | -7.66729200 | -1.22556500 | -2.13112400 |
| H  | -5.28336500 | -0.96356600 | -2.79055000 |
| H  | -4.18625600 | -4.14748200 | -0.08263700 |
| H  | -6.57202000 | -4.41838400 | 0.56153200  |
| H  | -8.31873000 | -2.95239100 | -0.45042900 |
| C  | -3.19317100 | -2.31892900 | -1.78929300 |
| C  | -2.01781100 | -2.06441500 | -1.98793600 |
| C  | -0.60081300 | -1.65911300 | -2.04784800 |
| O  | 0.83221700  | -4.45507300 | -0.26206600 |
| C  | -0.55120100 | -0.20210300 | -2.21939200 |
| C  | -0.47402300 | 1.00731700  | -2.34203900 |
| C  | -0.33634200 | 2.42334900  | -2.42590800 |
| C  | 0.19313400  | 3.03301000  | -3.58771300 |
| C  | -0.68477900 | 3.23746000  | -1.32218100 |
| C  | 0.37498000  | 4.41810600  | -3.63639200 |

|   |             |             |             |
|---|-------------|-------------|-------------|
| H | 0.46811400  | 2.41040200  | -4.43700000 |
| C | -0.49922600 | 4.62114500  | -1.38086000 |
| H | -1.08775900 | 2.77423600  | -0.42677600 |
| C | 0.03345500  | 5.21714200  | -2.53445900 |
| H | 0.79121200  | 4.87452600  | -4.53346800 |
| H | -0.76759800 | 5.23522400  | -0.52202400 |
| H | 0.18128400  | 6.29543200  | -2.57495100 |
| C | 0.20354100  | -2.40201700 | -3.18044600 |
| H | 1.14176300  | -1.84839700 | -3.31226000 |
| H | -0.34970800 | -2.41040700 | -4.12625900 |
| C | 0.48685400  | -3.78894400 | -2.59267000 |
| H | -0.33894600 | -4.48807500 | -2.79675800 |
| H | 1.41461800  | -4.24447200 | -2.95700300 |
| C | 0.53405600  | -3.57576700 | -1.07070200 |
| C | 0.13363600  | -2.18230000 | -0.75727000 |
| H | -0.49582900 | -2.14109300 | 0.13430800  |
| H | -4.82043600 | -0.71538800 | 0.12981500  |
| N | -4.53693300 | 0.04597800  | 0.75785400  |
| S | -4.14694700 | -0.41910200 | 2.35433600  |
| S | -4.30050900 | 1.56111900  | -0.00455600 |
| O | -4.99413800 | -1.56443400 | 2.66575700  |
| O | -4.05849700 | 0.77141200  | 3.18650800  |
| O | -3.34701200 | 2.35025100  | 0.76161800  |
| O | -4.17973900 | 1.29646200  | -1.43263000 |
| C | -2.35179600 | -1.10054500 | 2.10315200  |
| C | -6.04505100 | 2.32423900  | 0.27737100  |
| F | -1.66785800 | -0.27033500 | 1.31359000  |
| F | -1.75864100 | -1.19252000 | 3.29532200  |
| F | -2.44308100 | -2.30670800 | 1.54123900  |
| F | -6.27065000 | 2.43704500  | 1.58668400  |

|   |             |            |             |
|---|-------------|------------|-------------|
| F | -6.06905300 | 3.52710800 | -0.30084100 |
| F | -6.95910000 | 1.52659700 | -0.28212300 |

**TS6<sub>DCE</sub>**

0 1

|   |            |             |             |
|---|------------|-------------|-------------|
| C | 4.20883400 | -3.06654500 | -0.26782500 |
| C | 4.29510400 | -2.01949900 | 0.68734800  |
| C | 5.07185300 | -2.20477500 | 1.84901400  |
| C | 5.74336200 | -3.41020500 | 2.07938700  |
| C | 5.63604000 | -4.45427900 | 1.15249700  |
| C | 4.87574200 | -4.27819800 | -0.00866400 |
| C | 3.43111300 | -2.92749600 | -1.53229400 |
| C | 2.23527500 | -3.64787000 | -1.70553800 |
| C | 1.45168200 | -3.45450700 | -2.84952200 |
| C | 1.85615300 | -2.54409800 | -3.83498100 |
| C | 3.06014800 | -1.84275600 | -3.68284900 |
| C | 3.84493500 | -2.03736200 | -2.54005200 |
| H | 5.14786800 | -1.41104900 | 2.58756800  |
| H | 6.33764900 | -3.53297200 | 2.98347700  |
| H | 6.14664200 | -5.40002100 | 1.32855900  |
| H | 4.79989900 | -5.08214900 | -0.73936000 |
| H | 1.90008100 | -4.32291000 | -0.92041100 |
| H | 0.50673400 | -3.98278800 | -2.94541800 |
| H | 1.23540000 | -2.38055000 | -4.71449700 |
| H | 3.38848600 | -1.14328400 | -4.45072600 |
| H | 4.78327200 | -1.49979800 | -2.42885000 |
| P | 3.37724200 | -0.44002200 | 0.47073800  |
| C | 4.56899400 | 0.69689800  | -0.40045000 |
| C | 3.85905300 | 1.77740500  | -1.24083200 |
| C | 5.60887500 | 1.29769900  | 0.57033800  |

|   |            |             |             |
|---|------------|-------------|-------------|
| H | 5.10544600 | 0.03115200  | -1.08890000 |
| C | 4.89804600 | 2.62421700  | -1.99999700 |
| H | 3.26747700 | 2.43005500  | -0.58814900 |
| H | 3.15812800 | 1.29967900  | -1.93940200 |
| C | 6.63053200 | 2.14909900  | -0.20911200 |
| H | 5.10038000 | 1.93387900  | 1.30818700  |
| H | 6.12121100 | 0.49457900  | 1.11851700  |
| C | 5.92630300 | 3.24196100  | -1.03409900 |
| H | 4.38370500 | 3.41128200  | -2.56819600 |
| H | 5.42444700 | 1.98197900  | -2.72537900 |
| H | 7.34742700 | 2.59731100  | 0.49430600  |
| H | 7.20006500 | 1.49335800  | -0.88767500 |
| H | 6.66647700 | 3.83324600  | -1.59298600 |
| H | 5.40477600 | 3.93030000  | -0.34891500 |
| C | 3.05310500 | 0.23641400  | 2.17364100  |
| C | 2.35367900 | 1.61096100  | 2.05971400  |
| C | 2.18055600 | -0.75112100 | 2.98147500  |
| H | 4.02201300 | 0.37417700  | 2.67252700  |
| C | 2.02478000 | 2.17413000  | 3.45364500  |
| H | 1.42182800 | 1.48764500  | 1.48842900  |
| H | 2.97742000 | 2.32175200  | 1.50755100  |
| C | 1.84840300 | -0.17898300 | 4.37275100  |
| H | 1.24224200 | -0.92009400 | 2.43200200  |
| H | 2.68554200 | -1.72075500 | 3.07823300  |
| C | 1.15754000 | 1.19224200  | 4.26036600  |
| H | 1.51184200 | 3.13973600  | 3.33970700  |
| H | 2.96524500 | 2.36317800  | 3.99739800  |
| H | 1.20571200 | -0.88936800 | 4.91240600  |
| H | 2.78007800 | -0.07021600 | 4.95255200  |
| H | 0.95050700 | 1.59836700  | 5.26152900  |



|    |             |             |             |
|----|-------------|-------------|-------------|
| H  | 0.19069700  | 1.06273400  | 3.75029300  |
| Au | 1.31517000  | -0.62559600 | -0.49185500 |
| C  | -7.54542600 | 1.78776000  | -2.14390100 |
| C  | -6.22599900 | 1.33600300  | -2.23991400 |
| C  | -5.18067000 | 2.05672900  | -1.61567500 |
| C  | -5.49074500 | 3.23486200  | -0.89503300 |
| C  | -6.81375300 | 3.67698500  | -0.80532600 |
| C  | -7.84465200 | 2.95777100  | -1.42921100 |
| H  | -8.34321500 | 1.22275700  | -2.62434600 |
| H  | -5.99094100 | 0.42065900  | -2.77752100 |
| H  | -4.68950500 | 3.78480800  | -0.40542600 |
| H  | -7.04120200 | 4.58296600  | -0.24489900 |
| H  | -8.87467500 | 3.30391100  | -1.35511400 |
| C  | -3.83260100 | 1.59930800  | -1.69714300 |
| C  | -2.68401100 | 1.20056500  | -1.74275700 |
| C  | -1.28329500 | 0.73865500  | -1.76192100 |
| O  | -1.19532600 | -2.89056900 | -1.15006200 |
| C  | -0.43089000 | 1.88938800  | -1.43888500 |
| C  | 0.24872500  | 2.85406600  | -1.13803700 |
| C  | 1.06698100  | 3.95112100  | -0.74223300 |
| C  | 1.09971700  | 4.35796700  | 0.61272800  |
| C  | 1.88474600  | 4.62113300  | -1.68212000 |
| C  | 1.94120600  | 5.39890200  | 1.01412200  |
| H  | 0.47695600  | 3.84165300  | 1.33949500  |
| C  | 2.72112400  | 5.66218400  | -1.27067800 |
| H  | 1.86605800  | 4.30655200  | -2.72347000 |
| C  | 2.75605500  | 6.05238700  | 0.07689400  |
| H  | 1.96375700  | 5.69801800  | 2.06100200  |
| H  | 3.35248300  | 6.16571400  | -2.00124600 |
| H  | 3.41276900  | 6.86129800  | 0.39367600  |

|   |             |             |             |
|---|-------------|-------------|-------------|
| C | -0.91964700 | 0.09444600  | -3.15765600 |
| H | 0.17730200  | 0.09109100  | -3.22691100 |
| H | -1.34232200 | 0.66991500  | -3.98792600 |
| C | -1.43408000 | -1.34610600 | -3.05253500 |
| H | -2.51912200 | -1.39539200 | -3.22955000 |
| H | -0.93541900 | -2.04530600 | -3.73128700 |
| C | -1.19257000 | -1.74574800 | -1.59120800 |
| C | -1.06825300 | -0.48477800 | -0.81887400 |
| H | -0.72856900 | -0.36058500 | 0.22433300  |
| H | -2.25104700 | -0.76161900 | -0.09775500 |
| N | -3.21822200 | -1.01980100 | 0.72546200  |
| S | -4.71126900 | -1.52210400 | 0.15592400  |
| S | -2.87543700 | -0.56126000 | 2.29176600  |
| O | -4.60709200 | -1.52279900 | -1.30399100 |
| O | -5.83946300 | -0.89699700 | 0.85037100  |
| O | -3.87830200 | -0.98629800 | 3.26848400  |
| O | -1.44572100 | -0.82937300 | 2.49252800  |
| C | -4.73792600 | -3.38884800 | 0.65113600  |
| C | -2.99735500 | 1.35469000  | 2.19681600  |
| F | -4.39753400 | -3.54774500 | 1.93557300  |
| F | -5.98838200 | -3.84251500 | 0.46124700  |
| F | -3.89353600 | -4.07423600 | -0.12383200 |
| F | -4.19955600 | 1.71967700  | 1.74336800  |
| F | -2.80834600 | 1.85240200  | 3.42912700  |
| F | -2.04239100 | 1.82926300  | 1.38038800  |

**P<sub>2DCE</sub>**

0 1

|   |             |             |             |
|---|-------------|-------------|-------------|
| C | -5.48905800 | -1.69852600 | -0.00801400 |
| C | -4.43880900 | -0.77625600 | 0.02919300  |

|   |             |             |             |
|---|-------------|-------------|-------------|
| C | -3.09675700 | -1.22580100 | 0.03501200  |
| C | -2.83590600 | -2.61689200 | 0.00353500  |
| C | -3.89416700 | -3.52962600 | -0.03377800 |
| C | -5.22191400 | -3.07576800 | -0.03962600 |
| H | -6.51810300 | -1.34170900 | -0.01258000 |
| H | -4.64331400 | 0.29270100  | 0.05244100  |
| H | -1.80500900 | -2.96604200 | 0.00814300  |
| H | -3.68179800 | -4.59763700 | -0.05816300 |
| H | -6.04281800 | -3.79092900 | -0.06853400 |
| C | -2.01836700 | -0.29072100 | 0.07022800  |
| C | -1.09121600 | 0.49809600  | 0.09549800  |
| C | 0.01311300  | 1.47352500  | 0.12521800  |
| O | -1.75485200 | 4.37113900  | -1.13232300 |
| C | 1.29902900  | 0.77079600  | 0.06831800  |
| C | 2.36818800  | 0.18897200  | 0.03166200  |
| C | 3.62308500  | -0.49122000 | -0.01332300 |
| C | 4.35990300  | -0.71616400 | 1.17438700  |
| C | 4.14386000  | -0.95681700 | -1.24464200 |
| C | 5.58626600  | -1.38571000 | 1.12552400  |
| H | 3.96212000  | -0.36188500 | 2.12360500  |
| C | 5.37130000  | -1.62529300 | -1.28148100 |
| H | 3.57949300  | -0.78807900 | -2.15998200 |
| C | 6.09567400  | -1.84265700 | -0.09951200 |
| H | 6.14456400  | -1.55296900 | 2.04566200  |
| H | 5.76234200  | -1.97906300 | -2.23445100 |
| H | 7.05102000  | -2.36444300 | -0.13288200 |
| C | -0.10763500 | 2.39447500  | 1.40609500  |
| H | 0.84829000  | 2.92078000  | 1.52368000  |
| H | -0.30166400 | 1.79863900  | 2.30339100  |
| C | -1.22662100 | 3.38622300  | 1.05222000  |

|   |             |            |             |
|---|-------------|------------|-------------|
| H | -2.21914100 | 2.97120400 | 1.28597900  |
| H | -1.14280200 | 4.35785500 | 1.55391300  |
| C | -1.14951200 | 3.55255200 | -0.46953600 |
| C | -0.16548000 | 2.51839100 | -1.02800000 |
| H | 0.79378600  | 3.03523800 | -1.18782100 |
| H | -0.49801200 | 2.08775000 | -1.97769800 |

**TS4<sub>gas</sub>**

0 1

|   |            |             |             |
|---|------------|-------------|-------------|
| C | 4.59563600 | -2.80275200 | -1.56750500 |
| C | 5.03668200 | -1.94901500 | -0.52077000 |
| C | 6.23148400 | -2.26007900 | 0.15840300  |
| C | 6.97705300 | -3.39778000 | -0.16408300 |
| C | 6.52705300 | -4.25530300 | -1.17455200 |
| C | 5.34919600 | -3.95491600 | -1.86392100 |
| C | 3.36179100 | -2.54303400 | -2.35896000 |
| C | 2.28431400 | -3.44497100 | -2.29265300 |
| C | 1.08786100 | -3.17229700 | -2.96372000 |
| C | 0.95376200 | -1.99704600 | -3.71295600 |
| C | 2.03003200 | -1.10683000 | -3.80874100 |
| C | 3.22962200 | -1.38185800 | -3.14269800 |
| H | 6.57782900 | -1.61612200 | 0.96334900  |
| H | 7.89668100 | -3.61523600 | 0.37706700  |
| H | 7.09286700 | -5.15025900 | -1.42925800 |
| H | 5.00102100 | -4.60891100 | -2.66203400 |
| H | 2.37631600 | -4.33611600 | -1.67406700 |
| H | 0.25001700 | -3.86231900 | -2.87914500 |
| H | 0.01219700 | -1.77345800 | -4.21115200 |
| H | 1.93482700 | -0.19420600 | -4.39511400 |
| H | 4.06395800 | -0.68787000 | -3.21540900 |

|   |            |             |             |
|---|------------|-------------|-------------|
| P | 4.05914000 | -0.47692300 | 0.01724800  |
| C | 4.88203900 | 0.95122900  | -0.86768200 |
| C | 3.89618400 | 2.11157000  | -1.11045000 |
| C | 6.18418200 | 1.43351100  | -0.19567900 |
| H | 5.15432300 | 0.52629400  | -1.84580000 |
| C | 4.56637000 | 3.21413900  | -1.94894800 |
| H | 3.57625200 | 2.53251200  | -0.14998700 |
| H | 2.98991500 | 1.73482000  | -1.60348100 |
| C | 6.83844700 | 2.55385900  | -1.03014600 |
| H | 5.95329200 | 1.82308600  | 0.80657300  |
| H | 6.88194100 | 0.59277000  | -0.07379600 |
| C | 5.85543500 | 3.71530400  | -1.27242400 |
| H | 3.86251300 | 4.04394500  | -2.09140500 |
| H | 4.81138900 | 2.81167700  | -2.94654800 |
| H | 7.74459600 | 2.91364900  | -0.52119200 |
| H | 7.15418300 | 2.13758300  | -2.00089100 |
| H | 6.33296500 | 4.49397500  | -1.88484900 |
| H | 5.58915200 | 4.17485300  | -0.30719500 |
| C | 4.39195600 | -0.29159700 | 1.83958100  |
| C | 3.66979000 | 0.97574000  | 2.34915000  |
| C | 3.88002800 | -1.54839700 | 2.58132100  |
| H | 5.47179500 | -0.17615700 | 2.01373400  |
| C | 3.81825700 | 1.12426100  | 3.87358700  |
| H | 2.60241400 | 0.89856200  | 2.09206500  |
| H | 4.04907700 | 1.87222000  | 1.84582700  |
| C | 4.02275400 | -1.38955000 | 4.10688100  |
| H | 2.81777600 | -1.69265000 | 2.32674200  |
| H | 4.41931400 | -2.44000300 | 2.23542600  |
| C | 3.29775700 | -0.12579100 | 4.60545000  |
| H | 3.27739800 | 2.02105100  | 4.20809700  |

|    |             |             |             |
|----|-------------|-------------|-------------|
| H  | 4.88144900  | 1.27566300  | 4.12428500  |
| H  | 3.62643800  | -2.28428500 | 4.60813400  |
| H  | 5.09196900  | -1.31881600 | 4.36798800  |
| H  | 3.42209400  | -0.01512000 | 5.69221900  |
| H  | 2.21786700  | -0.23132200 | 4.40853900  |
| Au | 1.76428600  | -0.64361400 | -0.25901200 |
| C  | -7.32651200 | 3.40127300  | -0.58588200 |
| C  | -6.03419200 | 2.98570200  | -0.25776800 |
| C  | -5.03882900 | 2.90078300  | -1.25845400 |
| C  | -5.36955200 | 3.24855700  | -2.58821900 |
| C  | -6.66391400 | 3.66772500  | -2.90506300 |
| C  | -7.64668100 | 3.74379900  | -1.90729400 |
| H  | -8.08804000 | 3.44725400  | 0.19112500  |
| H  | -5.78472500 | 2.70478800  | 0.76253800  |
| H  | -4.60590900 | 3.17269700  | -3.35985500 |
| H  | -6.90927900 | 3.92992700  | -3.93364900 |
| H  | -8.65698800 | 4.06327700  | -2.15950900 |
| C  | -3.74265700 | 2.40921200  | -0.93270900 |
| C  | -2.67186200 | 1.91200500  | -0.64409400 |
| C  | -1.46528800 | 1.17334300  | -0.25559100 |
| O  | -0.76238900 | -1.87541900 | 1.67051600  |
| C  | -1.18398700 | -1.61040200 | 3.02675900  |
| H  | -0.56510700 | -0.80848000 | 3.45496700  |
| H  | -2.23968100 | -1.32001400 | 3.05721000  |
| H  | -1.03403800 | -2.54610500 | 3.57223500  |
| C  | -0.37159200 | 2.11352000  | 0.05444600  |
| C  | 0.48282600  | 2.92312800  | 0.36484300  |
| C  | 1.49014400  | 3.86144500  | 0.72421000  |
| C  | 1.94362800  | 4.82893300  | -0.20327200 |
| C  | 2.07418200  | 3.83284900  | 2.01195600  |

|   |             |             |             |
|---|-------------|-------------|-------------|
| C | 2.96439100  | 5.71730100  | 0.14148900  |
| H | 1.49142200  | 4.86162600  | -1.19235800 |
| C | 3.09649400  | 4.72293300  | 2.34879300  |
| H | 1.72375800  | 3.09778900  | 2.73224100  |
| C | 3.55156200  | 5.66453200  | 1.41413700  |
| H | 3.30784100  | 6.45109400  | -0.58639900 |
| H | 3.54003200  | 4.68135600  | 3.34294900  |
| H | 4.34935500  | 6.35729900  | 1.67761700  |
| C | -1.03510400 | 0.11700000  | -1.34753200 |
| H | -0.41266300 | 0.57745900  | -2.12035400 |
| H | -1.94687600 | -0.28257700 | -1.80609700 |
| C | -0.32978000 | -0.98826800 | -0.53314300 |
| H | -0.41077000 | -1.98855000 | -0.97324900 |
| C | -0.94207500 | -0.88755600 | 0.78656600  |
| C | -1.72853300 | 0.25249900  | 0.95871100  |
| H | -1.95648500 | 0.70335500  | 1.92204700  |
| N | -4.23166800 | -0.80108400 | 0.54260600  |
| S | -4.53706500 | -1.94425900 | -0.64748900 |
| S | -5.29538500 | -0.40785700 | 1.78694300  |
| O | -5.57052200 | -2.88826600 | -0.22523400 |
| O | -3.22748500 | -2.37569600 | -1.14134500 |
| O | -4.58160800 | 0.60764400  | 2.56563100  |
| O | -6.66809200 | -0.22280300 | 1.32982800  |
| C | -5.31282600 | -0.90693800 | -2.07922800 |
| C | -5.30399600 | -2.01182400 | 2.90984100  |
| F | -6.29676800 | -0.13605300 | -1.62353800 |
| F | -4.36670900 | -0.14916400 | -2.65262400 |
| F | -5.79536800 | -1.76948000 | -2.98863800 |
| F | -5.23107800 | -1.61620300 | 4.19170100  |
| F | -6.41997800 | -2.70867400 | 2.72209600  |

|   |             |             |            |
|---|-------------|-------------|------------|
| F | -4.23398600 | -2.78270600 | 2.63657900 |
| H | -3.10591200 | -0.39405600 | 0.67624100 |

**TS6<sub>gas</sub>**

0 1

|   |            |             |             |
|---|------------|-------------|-------------|
| C | 4.16873600 | -2.95096700 | -0.27132600 |
| C | 4.18507200 | -1.96370700 | 0.74817400  |
| C | 4.89038600 | -2.21334800 | 1.94203600  |
| C | 5.56286900 | -3.42299900 | 2.13995500  |
| C | 5.52776000 | -4.40731100 | 1.14577200  |
| C | 4.83484100 | -4.16855700 | -0.04510000 |
| C | 3.45205600 | -2.75179000 | -1.56294300 |
| C | 2.26732600 | -3.46364300 | -1.82006900 |
| C | 1.54942400 | -3.23843600 | -2.99941500 |
| C | 2.00139900 | -2.29531100 | -3.92968000 |
| C | 3.18984400 | -1.59323700 | -3.68975600 |
| C | 3.91500500 | -1.82739700 | -2.51661300 |
| H | 4.90266100 | -1.46833300 | 2.73342700  |
| H | 6.10057200 | -3.59678600 | 3.07051800  |
| H | 6.03861400 | -5.35716200 | 1.29561400  |
| H | 4.80864400 | -4.92660100 | -0.82620000 |
| H | 1.88224200 | -4.15544300 | -1.07441700 |
| H | 0.61595200 | -3.77108800 | -3.15612500 |
| H | 1.43141700 | -2.10905900 | -4.83842300 |
| H | 3.55548900 | -0.86908800 | -4.41651000 |
| H | 4.85197200 | -1.30319800 | -2.34501000 |
| P | 3.26884700 | -0.38352800 | 0.55558600  |
| C | 4.48834500 | 0.78515800  | -0.23872800 |
| C | 3.79548200 | 1.87124500  | -1.08544900 |
| C | 5.48638100 | 1.38031200  | 0.77813700  |



|   |            |             |             |
|---|------------|-------------|-------------|
| H | 5.05958300 | 0.13853100  | -0.91784700 |
| C | 4.84648000 | 2.74832500  | -1.78953900 |
| H | 3.16890600 | 2.50264400  | -0.44496600 |
| H | 3.12312500 | 1.39851000  | -1.81446100 |
| C | 6.51883500 | 2.27016000  | 0.05651400  |
| H | 4.94423900 | 1.98921700  | 1.51491200  |
| H | 5.99628400 | 0.57333400  | 1.32415600  |
| C | 5.82444800 | 3.36636100  | -0.77360000 |
| H | 4.33800500 | 3.53585700  | -2.36021600 |
| H | 5.41163800 | 2.13122700  | -2.50815600 |
| H | 7.20058000 | 2.71587700  | 0.79500900  |
| H | 7.12894100 | 1.64142100  | -0.61257500 |
| H | 6.57446400 | 3.98211500  | -1.29046700 |
| H | 5.26195200 | 4.03307800  | -0.10000600 |
| C | 2.89727800 | 0.24303700  | 2.26444600  |
| C | 2.21387400 | 1.62638300  | 2.17407800  |
| C | 1.98672100 | -0.75201300 | 3.02100400  |
| H | 3.85250700 | 0.35827900  | 2.79813300  |
| C | 1.89675500 | 2.16217900  | 3.58233500  |
| H | 1.27891900 | 1.51788000  | 1.60767800  |
| H | 2.83738500 | 2.34543800  | 1.63139400  |
| C | 1.66141800 | -0.21819200 | 4.43044600  |
| H | 1.05003800 | -0.86739300 | 2.45692700  |
| H | 2.46098400 | -1.74012100 | 3.08571500  |
| C | 1.01239800 | 1.17734200  | 4.36817500  |
| H | 1.39875000 | 3.13833100  | 3.49299800  |
| H | 2.84256000 | 2.32963900  | 4.12569700  |
| H | 0.99119000 | -0.92546100 | 4.93786600  |
| H | 2.59199200 | -0.16588800 | 5.02176600  |
| H | 0.83268200 | 1.55649200  | 5.38446300  |

|    |             |             |             |
|----|-------------|-------------|-------------|
| H  | 0.03969900  | 1.09269100  | 3.86567300  |
| Au | 1.25360000  | -0.52954000 | -0.51051000 |
| C  | -6.98260700 | 3.24667000  | -1.13400000 |
| C  | -5.64328100 | 2.94251700  | -1.38633600 |
| C  | -5.27246500 | 1.63454900  | -1.77601300 |
| C  | -6.27131600 | 0.64317600  | -1.90626700 |
| C  | -7.60730500 | 0.95877700  | -1.64824200 |
| C  | -7.96843300 | 2.25740700  | -1.26358700 |
| H  | -7.25834900 | 4.25553000  | -0.82910900 |
| H  | -4.87057000 | 3.70042300  | -1.27441700 |
| H  | -5.97991300 | -0.36764600 | -2.17860700 |
| H  | -8.36693500 | 0.18340800  | -1.73468800 |
| H  | -9.01109300 | 2.49605600  | -1.05784400 |
| C  | -3.90172700 | 1.31146900  | -1.98681600 |
| C  | -2.72465800 | 1.03582800  | -2.10944800 |
| C  | -1.30459000 | 0.64815000  | -2.11672500 |
| O  | -0.99998900 | -2.93158600 | -1.30069800 |
| C  | -0.48945000 | 1.82918200  | -1.81785700 |
| C  | 0.16747100  | 2.78414500  | -1.44781400 |
| C  | 0.93956100  | 3.85395300  | -0.91619400 |
| C  | 1.82014500  | 4.60709300  | -1.72547800 |
| C  | 0.86057400  | 4.14738800  | 0.46601600  |
| C  | 2.61907900  | 5.60442100  | -1.16085600 |
| H  | 1.87598200  | 4.38900400  | -2.79005000 |
| C  | 1.66446400  | 5.14475200  | 1.02172100  |
| H  | 0.17546000  | 3.57476000  | 1.08673600  |
| C  | 2.55205900  | 5.87175600  | 0.21430700  |
| H  | 3.29918300  | 6.17268500  | -1.79384700 |
| H  | 1.59901300  | 5.35504400  | 2.08830700  |
| H  | 3.17873400  | 6.64765300  | 0.65138900  |

|   |             |             |             |
|---|-------------|-------------|-------------|
| C | -0.91985500 | -0.06885400 | -3.46522200 |
| H | 0.17685500  | -0.06189500 | -3.53873100 |
| H | -1.35253800 | 0.44664700  | -4.32924700 |
| C | -1.41984700 | -1.50677900 | -3.26564300 |
| H | -2.51252900 | -1.56239200 | -3.38271700 |
| H | -0.95687900 | -2.24491900 | -3.92821100 |
| C | -1.11457100 | -1.82303500 | -1.79526000 |
| C | -1.05211200 | -0.50354500 | -1.09147700 |
| H | -0.69992300 | -0.27444700 | -0.05475000 |
| H | -2.12971700 | -0.66520000 | -0.34185500 |
| N | -3.13060200 | -0.77008700 | 0.59281200  |
| S | -4.40109000 | -1.81564800 | 0.29895500  |
| S | -2.74520400 | -0.11353600 | 2.05066500  |
| O | -4.32806700 | -2.07719300 | -1.14206700 |
| O | -5.65037400 | -1.41834600 | 0.94592700  |
| O | -3.34881100 | -0.78275000 | 3.20328300  |
| O | -1.29167900 | 0.15220100  | 2.00404400  |
| C | -3.82237000 | -3.46633500 | 1.17631600  |
| C | -3.51953900 | 1.63998600  | 1.94612300  |
| F | -2.50621200 | -3.43559800 | 1.42595200  |
| F | -4.48833900 | -3.62051000 | 2.32496300  |
| F | -4.09634900 | -4.49459600 | 0.36140800  |
| F | -4.82583100 | 1.56727100  | 1.69373700  |
| F | -3.31834000 | 2.26612100  | 3.12128000  |
| F | -2.90868000 | 2.33934400  | 0.97260100  |
